# Supplementary material for: Mice deficient in poly(C)-binding protein 4 are susceptible to spontaneous tumors through increased expression of ZFP871 that targets p53 for degradation
Source: PubMed Central journal article supplement — Genes Dev. 2016 Mar 1;30(5):522–34. doi: 10.1101/gad.271890.115 (PMC4782047; doi:10.1101/gad.271890.115), 2016-03-01
Supplement: supp_gad.271890.115_SuppFigures.pdf [file supp_gad.271890.115_SuppFigures.pdf]

Figure S1

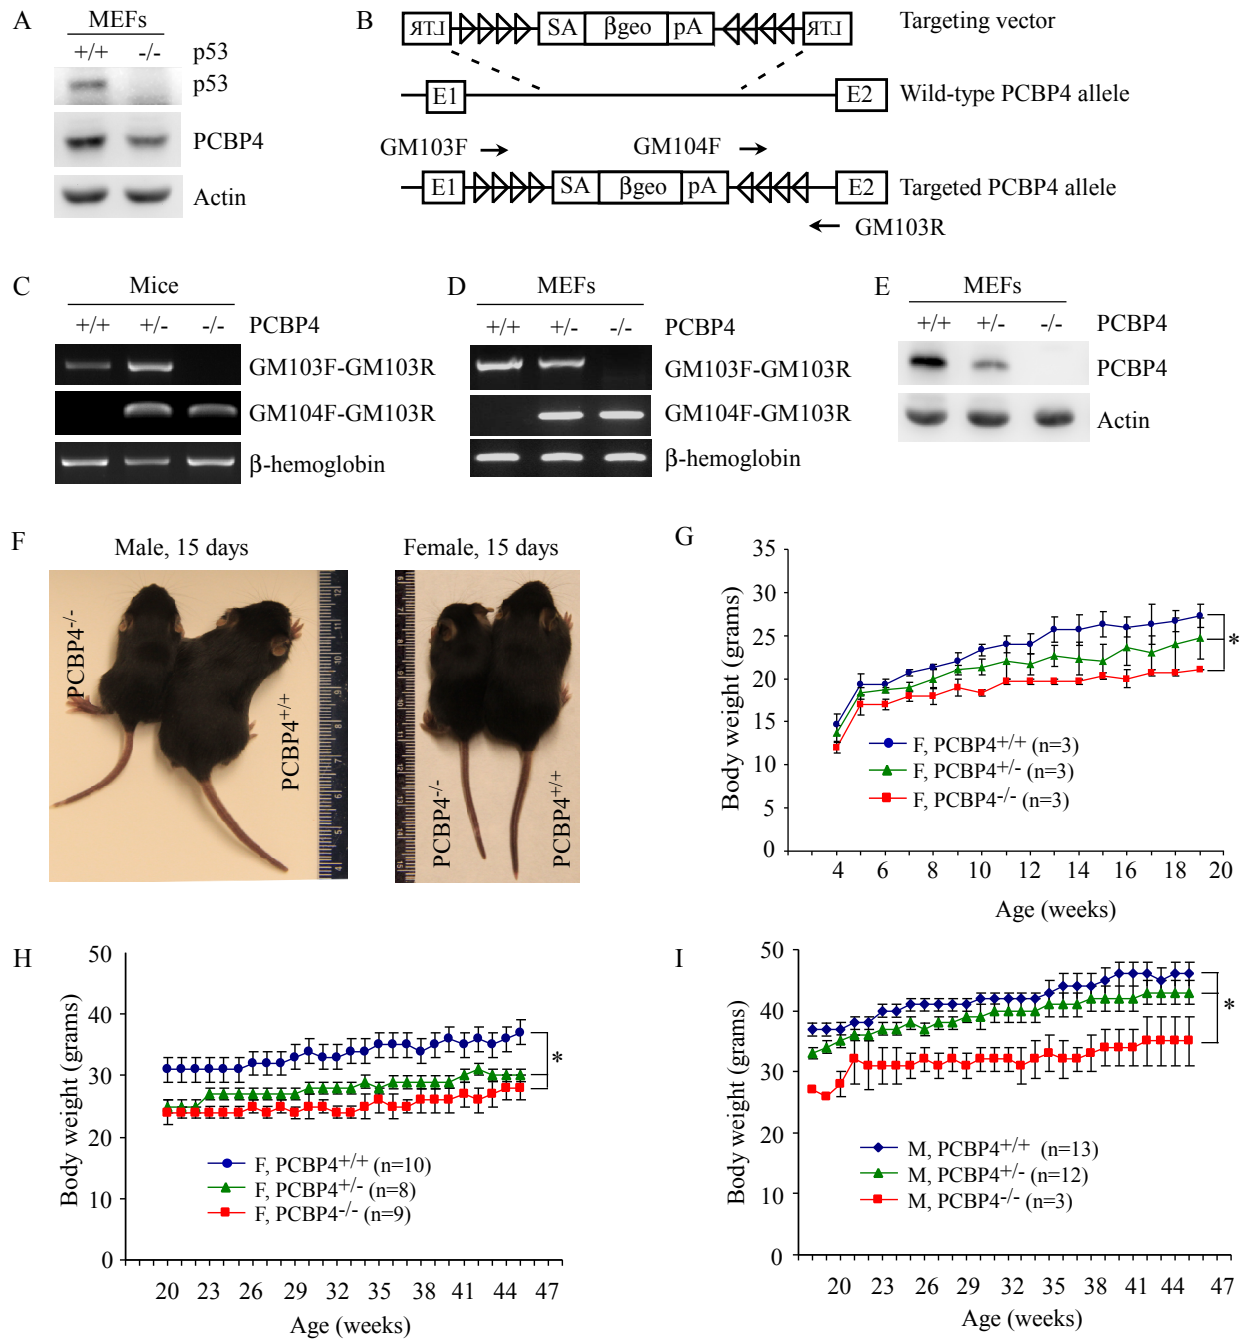

**Figure S1. Generation of *PCBP4* knockout mice and MEFs.** (A) The level of PCBP4 protein was measured in WT and *p53*<sup>-/-</sup> MEFs. (B) *PCBP4* knockout strategy and primers used for genotyping. The *PCBP4* gene was disrupted by insertion of a gene trap (rFRosaβgeo+1s) into the first intron. Primers GM103F and GM103R were used for genotyping wild-type *PCBP4* allele; primers GM104F and GM103R were used for genotyping the null allele. (C) Genotyping of WT, *PCBP4*<sup>+/-</sup>, and *PCBP4*<sup>-/-</sup> mice. Top and middle panels represent wild-type and knockout alleles of *PCBP4*, respectively. Bottom panel: β-hemoglobin was measured as an internal control. (D) Genotyping of *PCBP4* knockout MEFs. (E) The level of PCBP4 protein was measured in WT, *PCBP4*<sup>+/-</sup>, and *PCBP4*<sup>-/-</sup> MEFs. Actin was measured as an internal control. (F) Representative images of 15-day-old WT and *PCBP4*<sup>-/-</sup> male and female littermates. (G) The body weight of WT, *PCBP4*<sup>+/-</sup>, and *PCBP4*<sup>-/-</sup> female mice was measured each week from 4-19 weeks of age. Data are presented as means ± SDs. \* *P* < 0.05. (H) The body weight of WT, *PCBP4*<sup>+/-</sup>, and *PCBP4*<sup>-/-</sup> female mice was measured each week from 20-45 weeks of age. (I) The body weight of WT, *PCBP4*<sup>+/-</sup>, and *PCBP4*<sup>-/-</sup> male mice was measured each week from 18-45 weeks of age.

Figure S2

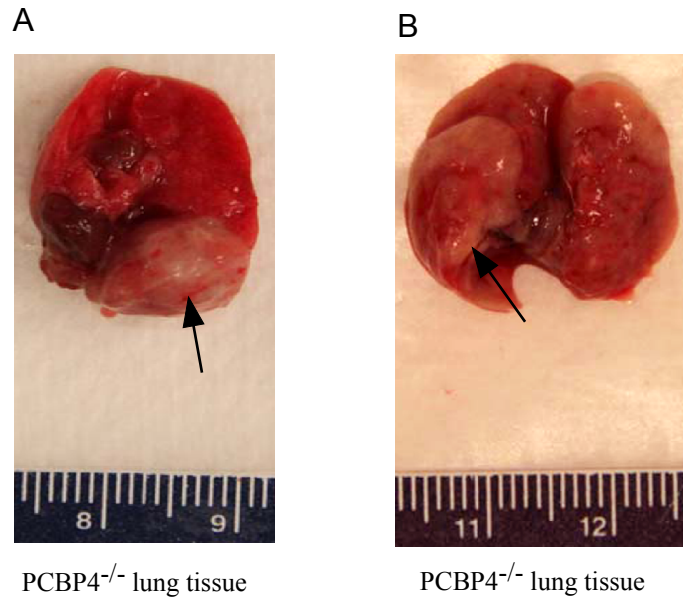

**Figure S2. *PCBP4* knockout mice are prone to lung cancer.** (A-B) Representative images of lung tissues from two *PCBP4*<sup>-/-</sup> mice. The main tick mark of the ruler represents one centimeter.

Figure S3

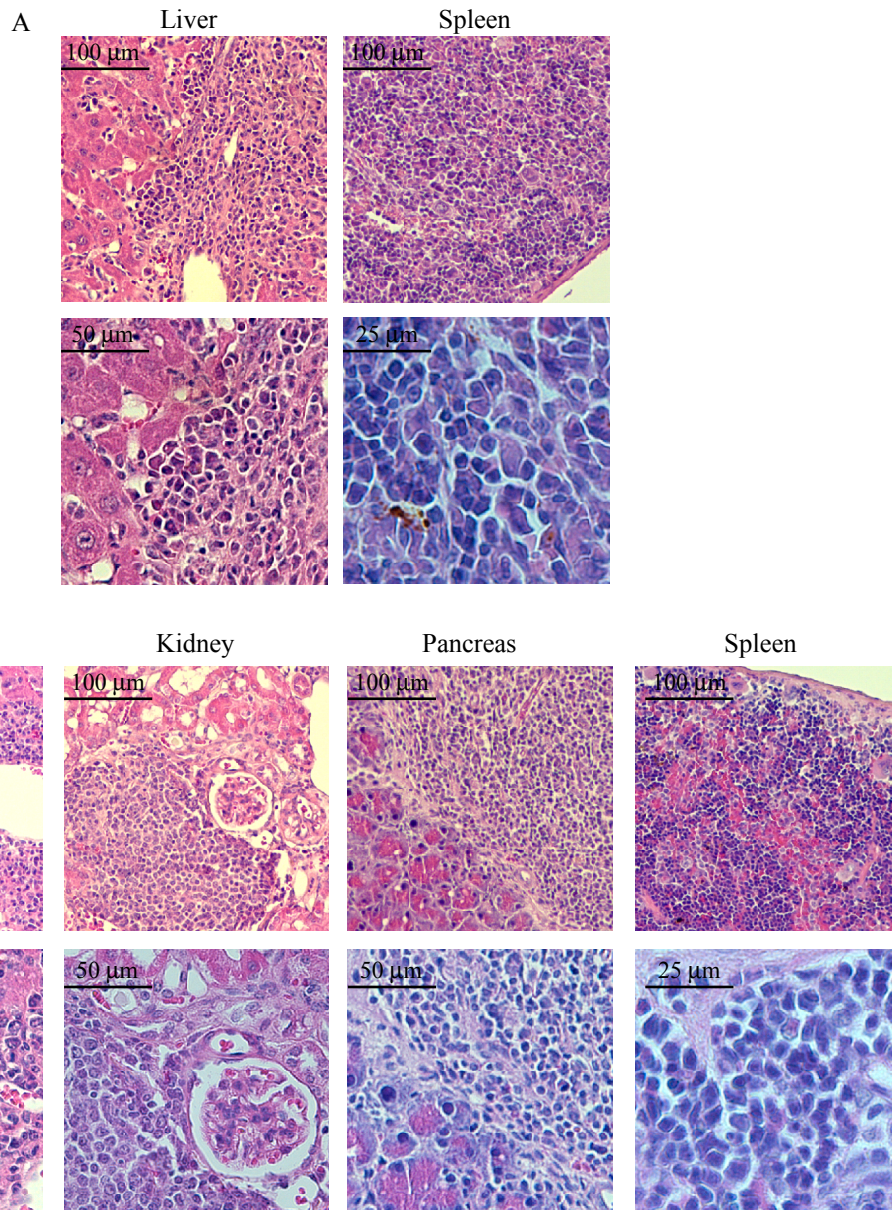

**Figure S3. *PCBP4* knockout mice are prone to lymphoma.** (A) Representative images of HE-stained sections of liver and spleen from *PCBP4*<sup>+/-</sup> mice. (B) Representative images of HE-stained sections of liver, kidney, pancreas, and spleen from *PCBP4*<sup>-/-</sup> mice.

Figure S4

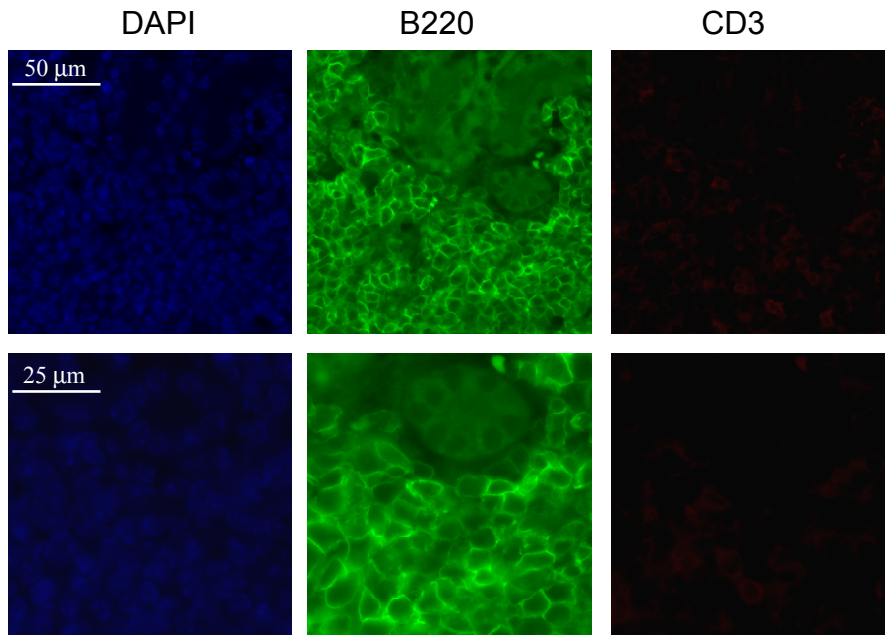

**Figure S4. *PCBP4* knockout mice are prone to B-cell lymphoma.** Representative images of immunofluorescence-stained kidney sections of *PCBP4*<sup>-/-</sup> mice with antibodies against B-cell marker B220 and T-cell marker CD3, respectively.

Figure S5

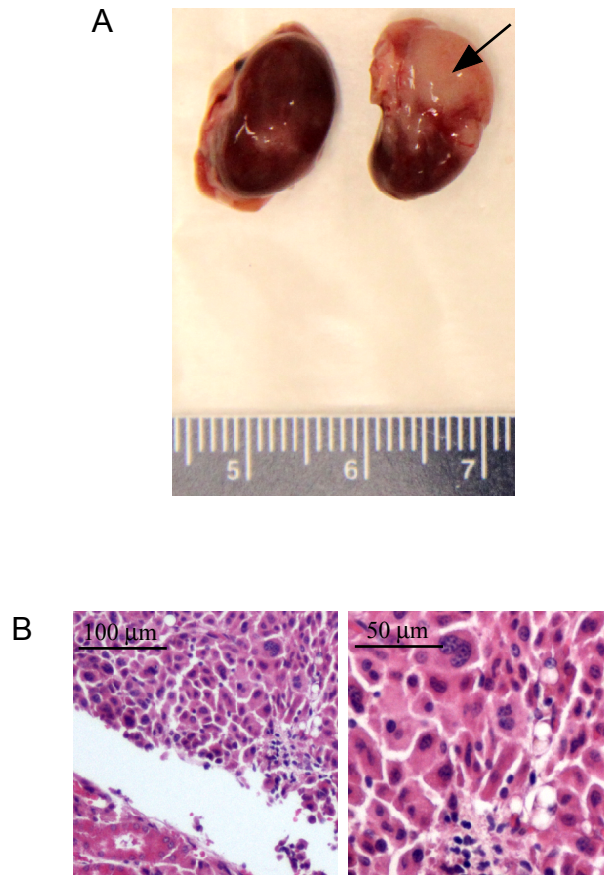

**Figure S5. Kidney tumors in *PCBP4*-deficient mice.** (A) Representative image of kidney tumor in one *PCBP4*<sup>-/-</sup> mouse. The main tick mark of the ruler represents one centimeter. (B) Representative images of HE-stained kidney tumor in one *PCBP4*<sup>+/-</sup> mouse.

Figure S6

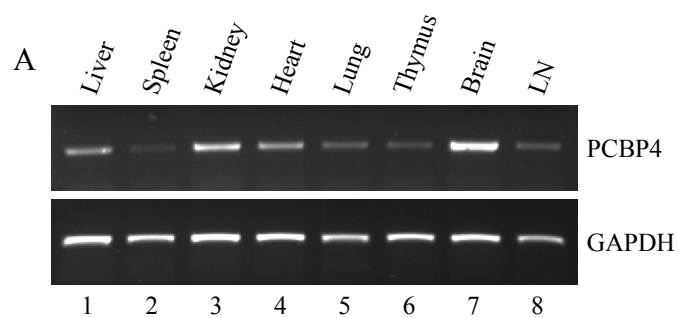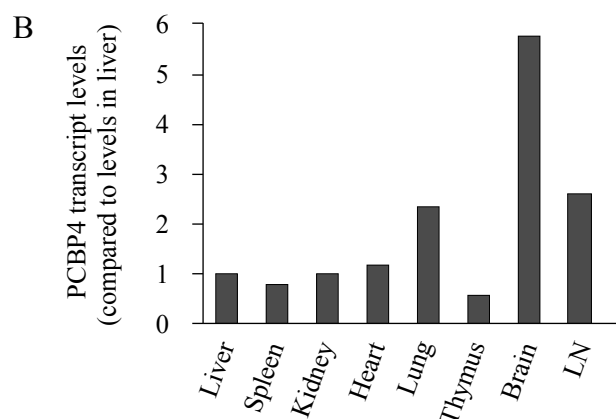

**Figure S6. The level of PCBP4 transcript in eight tissues of wild-type mouse.** (A) RT-PCR was performed to measure the levels of PCBP4 transcript in mouse liver, spleen, kidney, heart, lung, thymus, brain, and lymph node (LN). GAPDH was measured and used as a loading control. (B) The relative levels of PCBP4 transcript measured in (A) were normalized by level of GAPDH and then compared to the level of PCBP4 in liver.

Figure S7

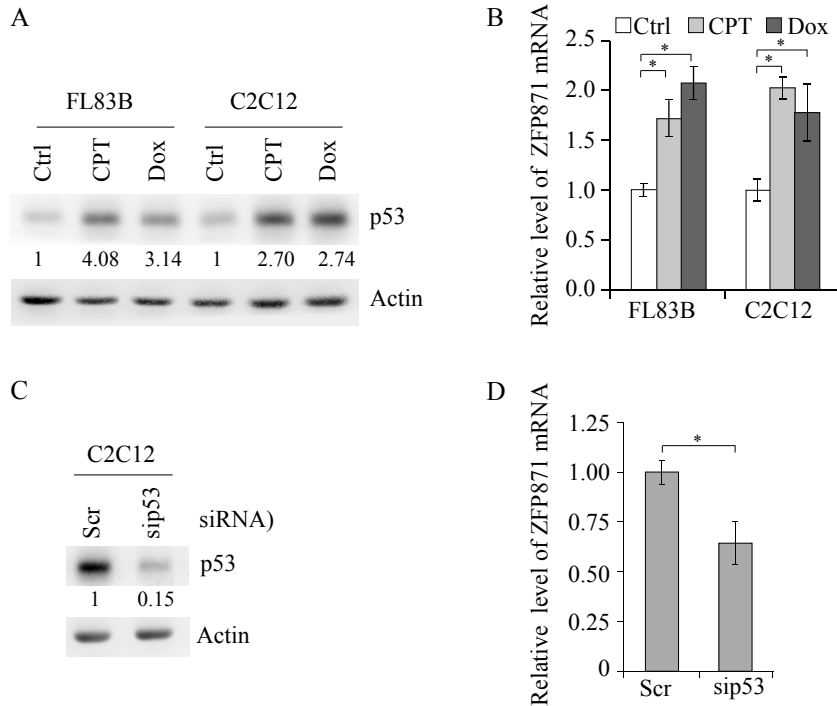

**Figure S7. The expression of ZFP871 is increased by activation of p53 but decreased by knockdown of p53 in cells.** (A) The levels of p53 and actin proteins were measured in FL83B and C2C12 cells, untreated or treated with 300 nM camptothecin or 0.3  $\mu$ g/ml doxorubicin for 24 h. (B) The level of ZFP871 mRNA was measured by qRT-PCR in FL83B and C2C12 cells, treated as in (A). Data were presented as means  $\pm$  SDs normalized to actin mRNA from three separate experiments. \* $P$ <0.05. (C) The levels of p53 and actin proteins were measured in C2C12 cells transfected with scrambled siRNA or siRNA against p53 for 3 day. (D) The level of ZFP871 mRNA was measured by qRT-PCR in C2C12 cells, treated as in (C). Data were presented as means  $\pm$  SDs normalized to actin mRNA from three separate experiments. \* $P$ <0.05.

Figure S8

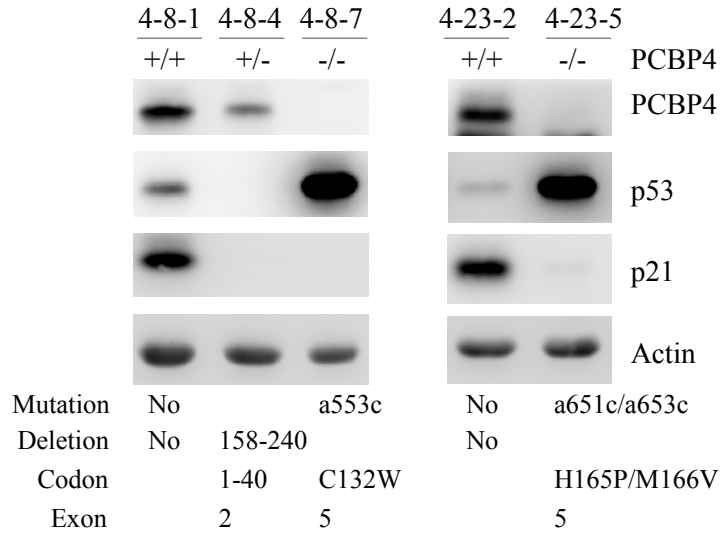

**Figure S8. The *p53* gene is prone to mutation in immortalized *PCBP4*-deficient MEFs.** The levels of PCBP4, p53, and p21 proteins were measured in two sets of immortalized WT, *PCBP4*<sup>+/-</sup> and *PCBP4*<sup>-/-</sup> littermate MEFs. Actin was used as a loading control. The mutation or deletion of the *p53* gene was determined by sequencing p53 cDNA from each line of MEFs and listed below the western blots.



Figure S9

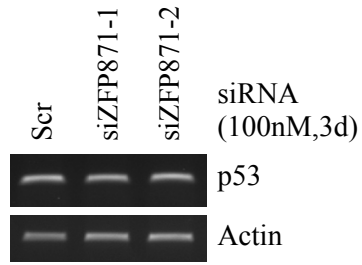

**Figure S9.** The level of p53 transcript was measured in C2C12 cells transfected with a scrambled siRNA or one of the two unique siRNAs against ZFP871. Actin was measured and used as a loading control.

Figure S10

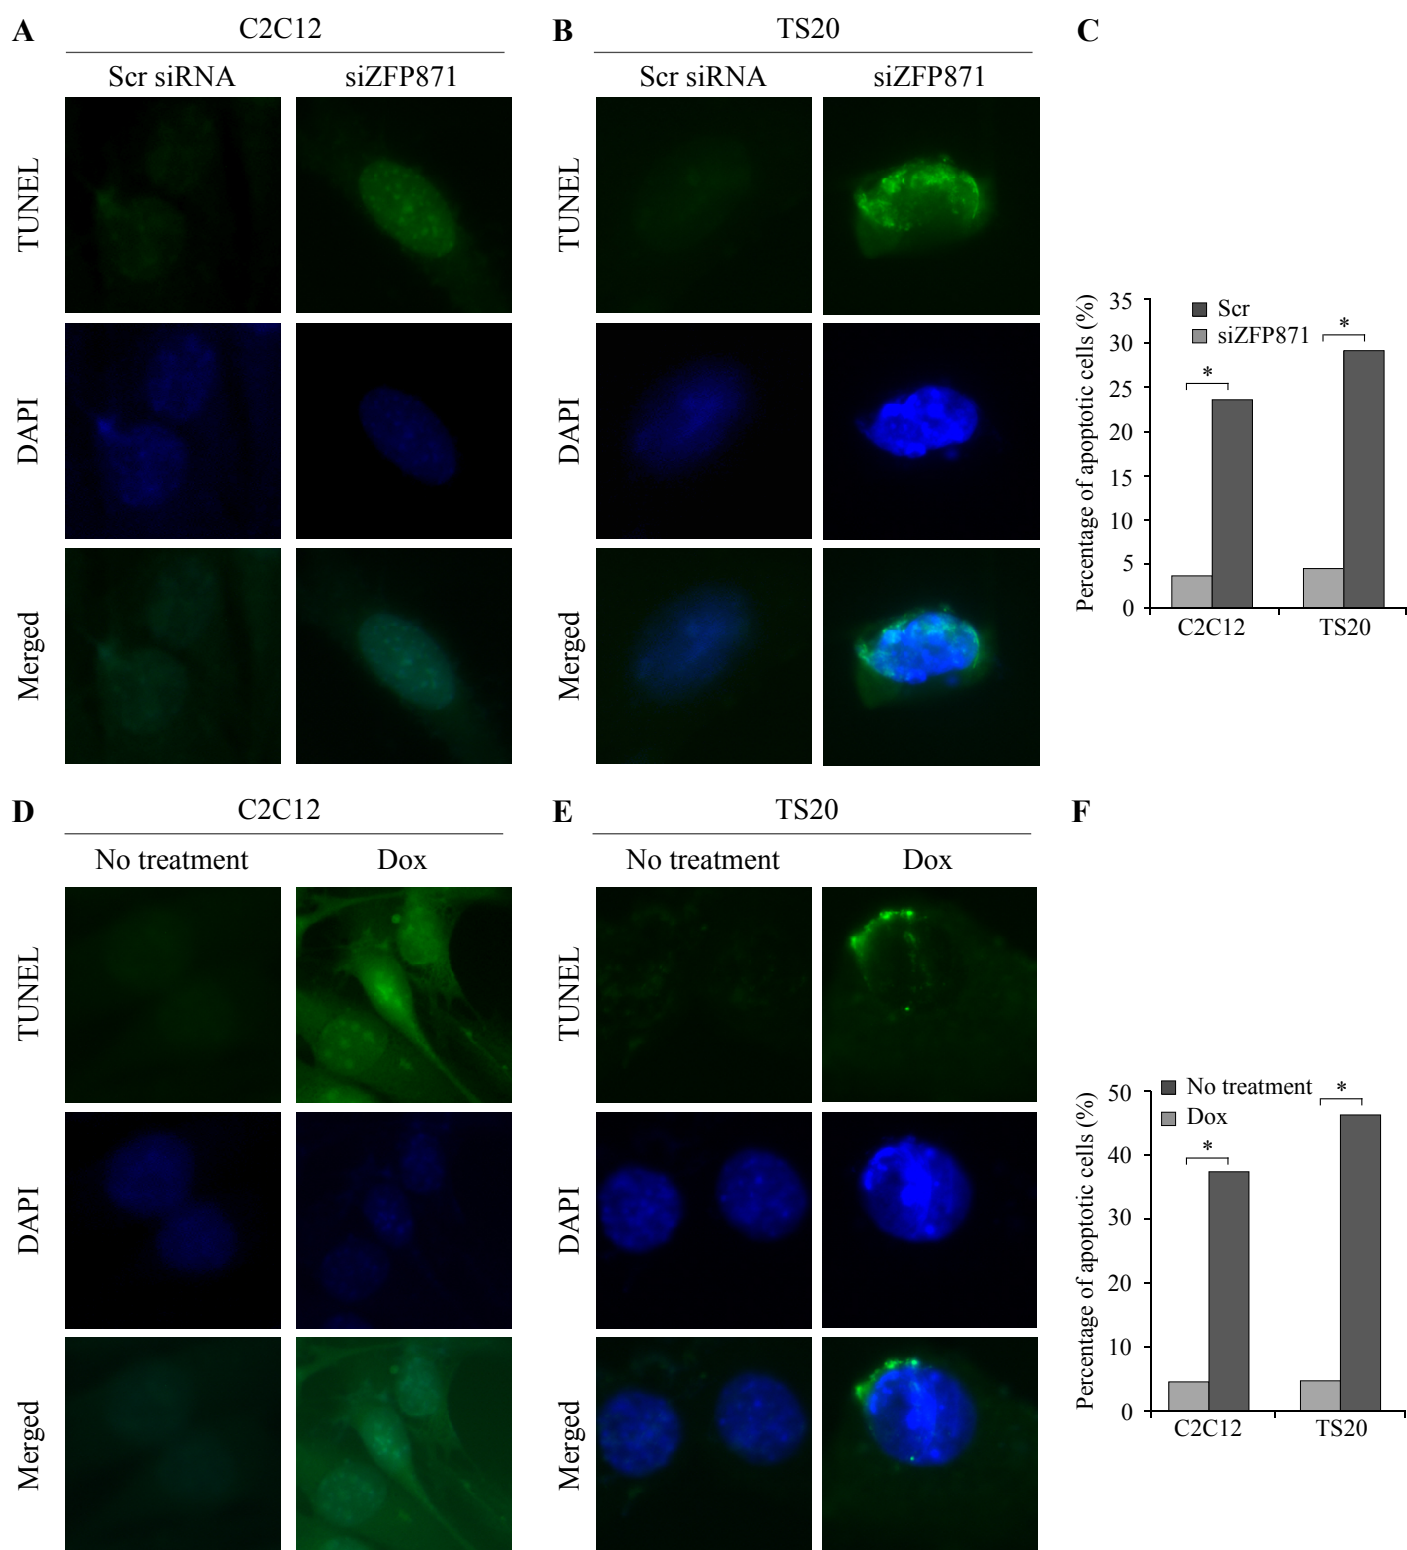

**Figure S10. Knockdown of ZFP871 and treatment with doxorubicin lead to apoptosis in C2C12 and TS20 cells.** (A-B) The apoptotic cells were measured with TUNEL assay in C2C12 (A) and TS20 (B) cells transfected with scrambled siRNA or siRNA against ZFP871 for 3 d. (C) The percentage of apoptotic cells shown in (A-B). \* $P < 0.05$ . (D-E) The apoptotic cells were measured with TUNEL assay in C2C12 (D) and TS20 (E) cells untreated or treated with 0.3  $\mu\text{g/ml}$  doxorubicin for 24 h. (F) The percentage of apoptotic cells shown in (D-E). \* $P < 0.05$ .
