# Supplementary material for: Mice deficient in poly(C)-binding protein 4 are susceptible to spontaneous tumors through increased expression of ZFP871 that targets p53 for degradation
Source: PubMed Central journal article supplement — Genes Dev. 2016 Mar 1;30(5):522–34. doi: 10.1101/gad.271890.115 (PMC4782047; doi:10.1101/gad.271890.115), 2016-03-01
Supplement: supp_gad.271890.115_SuppTables.pdf [file supp_gad.271890.115_SuppTables.pdf]

**Table S1.** Body weight of WT, *PCBP4*<sup>+/-</sup>, and *PCBP4*<sup>-/-</sup> female mice from 4 to 19 weeks of age

**Genotype: WT**

| ID      | Wks | 4  | 5  | 6  | 7  | 8  | 9  | 10 | 11 | 12 | 13 | 14 | 15 | 16 | 17 | 18 | 19 |
|---------|-----|----|----|----|----|----|----|----|----|----|----|----|----|----|----|----|----|
| 69      |     | 13 | 17 | 20 | 21 | 21 | 23 | 24 | 25 | 26 | 28 | 29 | 29 | 28 | 31 | 29 | 30 |
| 74      |     | 17 | 21 | 20 | 21 | 22 | 23 | 24 | 25 | 24 | 26 | 25 | 26 | 26 | 24 | 25 | 26 |
| 47      |     | 14 | 20 | 18 | 20 | 21 | 20 | 22 | 22 | 22 | 23 | 23 | 24 | 24 | 24 | 26 | 26 |
| Avg (g) |     | 15 | 19 | 19 | 21 | 21 | 22 | 23 | 24 | 24 | 26 | 26 | 26 | 26 | 26 | 27 | 27 |
| SD      |     | 2  | 2  | 1  | 1  | 1  | 2  | 1  | 2  | 2  | 3  | 3  | 3  | 2  | 4  | 2  | 2  |

**Genotype: *PCBP4*<sup>+/-</sup>**

| ID      | Wks | 4  | 5  | 6  | 7  | 8  | 9  | 10 | 11 | 12 | 13 | 14 | 15 | 16 | 17 | 18 | 19 |
|---------|-----|----|----|----|----|----|----|----|----|----|----|----|----|----|----|----|----|
| 73      |     | 14 | 19 | 19 | 20 | 22 | 22 | 23 | 26 | 24 | 25 | 26 | 26 | 28 | 27 | 27 | 29 |
| 81      |     | 15 | 17 | 18 | 18 | 18 | 21 | 21 | 21 | 20 | 22 | 21 | 21 | 22 | 21 | 21 | 24 |
| 49      |     | 12 | 19 | 19 | 19 | 20 | 20 | 20 | 19 | 21 | 21 | 20 | 19 | 21 | 21 | 22 | 21 |
| Avg (g) |     | 14 | 18 | 19 | 19 | 20 | 21 | 21 | 22 | 22 | 23 | 22 | 22 | 24 | 23 | 24 | 25 |
| SD      |     | 2  | 1  | 1  | 1  | 2  | 1  | 2  | 4  | 2  | 2  | 3  | 4  | 4  | 3  | 4  | 4  |

**Genotype: *PCBP4*<sup>-/-</sup>**

| ID      | Wks | 4  | 5  | 6  | 7  | 8  | 9  | 10 | 11 | 12 | 13 | 14 | 15 | 16 | 17 | 18 | 19 |
|---------|-----|----|----|----|----|----|----|----|----|----|----|----|----|----|----|----|----|
| 79      |     | 12 | 15 | 16 | 17 | 16 | 18 | 18 | 19 | 19 | 20 | 19 | 20 | 21 | 21 | 20 | 20 |
| 50      |     | 11 | 17 | 18 | 18 | 19 | 21 | 18 | 20 | 20 | 19 | 20 | 20 | 18 | 20 | 21 | 21 |
| 46      |     | 13 | 19 | 17 | 19 | 19 | 18 | 19 | 20 | 20 | 20 | 20 | 21 | 21 | 21 | 21 | 21 |
| Avg (g) |     | 12 | 17 | 17 | 18 | 18 | 19 | 18 | 20 | 20 | 20 | 20 | 20 | 20 | 21 | 21 | 21 |
| SD      |     | 1  | 2  | 1  | 1  | 2  | 2  | 1  | 1  | 1  | 1  | 1  | 1  | 2  | 1  | 1  | 1  |

**Table S2.** Body weight of WT, *PCBP4*<sup>+/-</sup>, and *PCBP4*<sup>-/-</sup> female mice from 20 to 45 weeks of age

**Genotype: WT**

| ID      | Wks | 20 | 21 | 22 | 23 | 24 | 25 | 26 | 27 | 28 | 29 | 30 | 31 | 32 | 33 | 34 | 35 | 36 | 37 | 38 | 39 | 40 | 41 | 42 | 43 | 44 | 45 |
|---------|-----|----|----|----|----|----|----|----|----|----|----|----|----|----|----|----|----|----|----|----|----|----|----|----|----|----|----|
| 51      |     |    |    |    | 24 | 25 | 25 | 28 | 28 | 27 | 29 | 28 | 29 | 29 | 29 | 30 | 29 | 29 | 29 | 30 | 31 | 28 | 31 | 31 | 30 | 33 | 31 |
| 58      |     |    | 29 | 28 | 28 | 28 | 29 | 31 | 32 | 29 | 30 | 30 | 30 | 30 | 31 | 33 | 33 | 31 | 32 | 33 | 34 | 33 | 33 | 32 | 32 | 34 |    |
| 65      |     |    | 31 | 32 | 31 | 31 | 31 | 31 | 32 | 30 | 31 | 31 | 30 | 31 | 31 | 31 | 30 | 31 | 31 | 31 | 30 | 30 | 29 | 32 | 32 | 31 | 31 |
| 69      |     | 33 | 32 | 31 | 36 | 34 | 34 | 35 | 35 | 35 | 36 | 42 | 40 | 38 | 38 | 38 | 40 | 42 | 40 | 38 | 40 | 40 | 40 | 44 | 41 | 42 | 43 |
| 77      |     | 25 | 25 | 24 | 25 | 26 | 28 | 28 | 27 | 29 | 27 | 30 | 27 | 29 | 28 | 27 | 29 | 29 | 28 | 29 | 28 | 30 | 31 | 30 | 29 | 30 | 31 |
| 96      |     | 22 | 22 | 22 | 23 | 21 | 21 | 23 | 21 | 23 | 24 | 23 | 22 | 21 | 25 | 23 | 25 | 26 | 24 | 23 | 26 | 26 | 26 | 26 | 25 | 27 | 26 |
| 99      |     | 35 | 35 | 35 | 34 | 35 | 35 | 38 | 34 | 35 | 37 | 37 | 38 | 39 | 38 | 38 | 39 | 41 | 43 | 42 | 43 | 44 | 44 | 45 | 44 | 44 | 45 |
| 6       |     | 30 | 31 | 30 | 30 | 32 | 32 | 29 | 33 | 34 | 32 | 32 | 35 | 32 | 34 | 33 | 35 | 35 | 36 | 35 | 36 | 36 | 35 | 35 | 37 | 37 | 37 |
| 12      |     | 39 | 38 | 37 | 39 | 40 | 39 | 39 | 40 | 40 | 41 | 44 | 41 | 42 | 42 | 43 | 41 | 40 | 39 | 40 | 40 | 39 | 38 | 37 | 38 | 36 | 40 |
| 21      |     | 32 | 35 | 37 | 39 | 37 | 38 | 40 | 39 | 39 | 41 | 41 | 42 | 42 | 43 | 44 | 44 | 46 | 44 | 43 | 46 | 48 | 46 | 46 | 45 | 48 | 50 |
| Avg (g) |     | 31 | 31 | 31 | 31 | 31 | 31 | 32 | 32 | 32 | 33 | 34 | 33 | 33 | 34 | 34 | 35 | 35 | 35 | 34 | 35 | 36 | 35 | 36 | 35 | 36 | 37 |
| SD      |     | 6  | 5  | 5  | 6  | 6  | 6  | 6  | 6  | 5  | 6  | 7  | 7  | 7  | 6  | 7  | 6  | 7  | 7  | 6  | 7  | 7  | 7  | 7  | 7  | 7  | 8  |

**Genotype: *PCBP4*<sup>+/-</sup>**

| ID      | Wks | 20 | 21 | 22 | 23 | 24 | 25 | 26 | 27 | 28 | 29 | 30 | 31 | 32 | 33 | 34 | 35 | 36 | 37 | 38 | 39 | 40 | 41 | 42 | 43 | 44 | 45 |    |   |
|---------|-----|----|----|----|----|----|----|----|----|----|----|----|----|----|----|----|----|----|----|----|----|----|----|----|----|----|----|----|---|
| 47      |     |    |    |    | 28 | 28 | 28 | 27 | 28 | 29 | 27 | 28 | 28 | 28 | 30 | 30 | 28 | 28 | 29 | 29 | 28 | 28 | 31 | 29 | 30 | 30 | 29 |    |   |
| 52      |     |    |    |    | 31 | 30 | 31 | 31 | 32 | 32 | 32 | 32 | 31 | 31 | 31 | 32 | 31 | 31 | 31 | 33 | 32 | 32 | 33 | 33 | 31 | 33 | 31 |    |   |
| 67      |     |    | 23 | 23 | 24 | 23 | 24 | 23 | 26 | 24 | 25 | 26 | 26 | 26 | 25 | 26 | 25 | 26 | 25 | 26 | 26 | 26 | 26 | 28 | 28 | 27 | 27 |    |   |
| 76      |     | 23 | 23 | 23 | 23 | 24 | 23 | 25 | 24 | 26 | 25 | 28 | 27 | 27 | 27 | 27 | 27 | 27 | 28 | 27 | 27 | 26 | 28 | 30 | 28 | 27 | 28 |    |   |
| 97      |     | 26 | 25 | 26 | 27 | 26 | 26 | 26 | 26 | 25 | 27 | 26 | 28 | 29 | 28 | 30 | 29 | 31 | 29 | 30 | 33 | 32 | 34 | 33 | 33 | 34 | 34 |    |   |
| 7       |     | 27 | 27 | 26 | 28 | 29 | 29 | 27 | 29 | 29 | 28 | 29 | 29 | 29 | 29 | 30 | 29 | 30 | 29 | 30 | 30 | 29 | 32 | 32 | 30 | 30 | 31 |    |   |
| 11      |     | 26 | 27 | 26 | 26 | 29 | 27 | 27 | 29 | 28 | 29 | 29 | 29 | 29 | 29 | 31 | 30 | 30 | 30 | 30 | 30 | 30 | 30 | 30 | 31 | 29 | 31 |    |   |
| 19      |     | 23 | 24 | 25 | 26 | 24 | 25 | 26 | 25 | 24 | 26 | 25 | 25 | 26 | 26 | 26 | 27 | 26 | 27 | 28 | 28 | 27 | 27 | 29 | 26 | 28 | 30 |    |   |
| Avg (g) |     | 25 | 25 | 25 | 27 | 27 | 27 | 27 | 27 | 27 | 27 | 28 | 28 | 28 | 28 | 29 | 28 | 29 | 29 | 29 | 29 | 29 | 29 | 30 | 31 | 30 | 30 | 30 |   |
| SD      |     | 2  | 2  | 1  | 3  | 3  | 3  | 2  | 3  | 3  | 2  | 2  | 2  | 2  | 2  | 2  | 2  | 2  | 2  | 2  | 2  | 2  | 2  | 2  | 3  | 2  | 2  | 3  | 2 |

**Genotype: *PCBP4*<sup>-/-</sup>**

| ID      | Wks | 20 | 21 | 22 | 23 | 24 | 25 | 26 | 27 | 28 | 29 | 30 | 31 | 32 | 33 | 34 | 35 | 36 | 37 | 38 | 39 | 40 | 41 | 42 | 43 | 44 | 45 |   |
|---------|-----|----|----|----|----|----|----|----|----|----|----|----|----|----|----|----|----|----|----|----|----|----|----|----|----|----|----|---|
| 46      |     |    |    |    | 26 | 26 | 26 | 26 | 26 | 26 | 25 | 25 | 27 | 25 | 26 | 26 | 28 | 26 | 26 | 26 | 26 | 28 | 27 | 26 | 27 | 27 | 29 |   |
| 71      |     | 19 | 19 | 20 | 20 | 20 | 21 | 20 | 20 | 22 | 21 | 23 | 21 | 21 | 21 | 20 | 21 | 19 | 22 | 20 | 21 | 21 | 22 | 24 | 22 | 23 | 23 |   |
| 72      |     | 21 | 23 | 22 | 22 | 22 | 23 | 24 | 23 | 25 | 23 | 23 | 24 | 22 | 23 | 24 | 23 | 26 | 25 | 25 | 26 | 26 | 25 | 23 | 25 | 26 | 25 |   |
| 73      |     | 25 | 23 | 26 | 25 | 26 | 26 | 25 | 27 | 27 | 24 | 25 | 26 | 25 | 24 | 25 | 28 | 26 | 25 | 25 | 26 | 26 | 29 | 28 | 31 | 30 | 27 |   |
| 75      |     | 31 | 28 | 25 | 27 | 26 | 24 | 26 | 24 | 26 | 25 | 28 | 26 | 26 | 26 | 25 | 27 | 26 | 27 | 27 | 27 | 26 | 27 | 27 | 27 | 30 | 33 |   |
| 81      |     | 25 | 24 | 25 | 26 | 26 | 25 | 27 | 24 | 26 | 25 | 26 | 27 | 25 | 25 | 26 | 28 | 27 | 26 | 26 | 28 | 26 | 27 | 27 | 29 | 27 | 28 |   |
| 89      |     | 30 | 28 | 31 | 28 | 29 | 29 | 30 | 29 | 30 | 31 | 34 | 31 | 30 | 32 | 34 | 34 | 32 | 33 | 34 | 35 | 38 | 36 | 36 | 36 | 36 | 36 |   |
| 94      |     | 20 | 21 | 20 | 21 | 20 | 20 | 21 | 21 | 20 | 20 | 20 | 21 | 21 | 19 | 21 | 19 | 20 | 20 | 21 | 22 | 21 | 21 | 21 | 23 | 21 | 21 |   |
| 5       |     | 23 | 23 | 23 | 23 | 23 | 23 | 24 | 23 | 26 | 25 | 25 | 25 | 25 | 24 | 23 | 25 | 24 | 23 | 28 | 26 | 25 | 27 | 26 | 26 | 28 | 26 |   |
| Avg (g) |     | 24 | 24 | 24 | 24 | 24 | 24 | 25 | 24 | 25 | 24 | 25 | 25 | 24 | 24 | 25 | 26 | 25 | 25 | 26 | 26 | 26 | 27 | 26 | 27 | 28 | 28 |   |
| SD      |     | 4  | 3  | 4  | 3  | 3  | 3  | 3  | 3  | 3  | 3  | 4  | 3  | 3  | 4  | 4  | 4  | 4  | 4  | 4  | 4  | 4  | 5  | 4  | 4  | 4  | 4  | 5 |

**Table S3.** Body weight of WT, *PCBP4*<sup>+/-</sup>, and *PCBP4*<sup>-/-</sup> male mice from 18 to 45 weeks of age

**Genotype: WT**

| ID      | Wks | 18 | 19 | 20 | 21 | 22 | 23 | 24 | 25 | 26 | 27 | 28 | 29 | 30 | 31 | 32 | 33 | 34 | 35 | 36 | 37 | 38 | 39 | 40 | 41 | 42 | 43         | 44 | 45 |    |    |
|---------|-----|----|----|----|----|----|----|----|----|----|----|----|----|----|----|----|----|----|----|----|----|----|----|----|----|----|------------|----|----|----|----|
| 48      |     |    |    |    |    |    | 48 | 48 | 47 | 43 | 42 | 42 | 41 | 41 | 42 | 40 | 41 | 41 | 40 | 41 | 44 | 43 | 41 | 42 | 42 | 42 | 42         | 42 | 43 |    |    |
| 56      |     |    |    |    |    |    | 43 | 41 | 40 | 40 | 40 | 40 | 38 | 40 | 42 | 40 | 41 | 42 | 42 | 42 | 44 | 42 | 43 | 40 | 36 | 35 | Euthanized |    |    |    |    |
| 60      |     |    |    |    | 40 | 40 | 40 | 39 | 39 | 40 | 40 | 40 | 39 | 37 | 38 | 38 | 38 | 37 | 38 | 38 | 38 | 36 | 38 | 37 | 38 | 38 | 37         | 38 | 38 |    |    |
| 80      |     |    |    |    | 33 | 33 | 33 | 33 | 34 | 33 | 35 | 34 | 34 | 33 | 35 | 34 | 35 | 34 | 35 | 35 | 35 | 35 | 36 | 35 | 35 | 36 | 35         | 35 | 35 |    |    |
| 84      |     |    |    |    | 42 | 44 | 43 | 43 | 43 | 44 | 44 | 44 | 45 | 44 | 44 | 45 | 44 | 44 | 43 | 46 | 45 | 45 | 46 | 46 | 46 | 48 | 47         | 47 | 45 | 47 |    |
| 86      |     | 38 | 38 | 38 | 38 | 39 | 40 | 41 | 41 | 42 | 41 | 43 | 43 | 44 | 44 | 44 | 46 | 45 | 45 | 46 | 46 | 46 | 46 | 46 | 48 | 47 | 49         | 46 | 47 | 47 |    |
| 98      |     | 39 | 39 | 39 | 39 | 39 | 40 | 41 | 41 | 41 | 42 | 42 | 43 | 44 | 44 | 45 | 46 | 44 | 45 | 47 | 47 | 47 | 47 | 48 | 49 | 47 | 49         | 49 | 48 | 48 |    |
| 3       |     | 42 | 42 | 43 | 44 | 44 | 44 | 45 | 49 | 47 | 48 | 47 | 49 | 47 | 49 | 51 | 49 | 50 | 52 | 52 | 52 | 53 | 54 | 54 | 54 | 55 | 54         | 54 | 54 |    |    |
| 8       |     | 32 | 32 | 31 | 33 | 31 | 33 | 33 | 36 | 33 | 33 | 34 | 35 | 34 | 34 | 34 | 33 | 34 | 35 | 35 | 35 | 34 | 35 | 35 | 35 | 35 | 35         | 35 | 35 |    |    |
| 13      |     | 35 | 35 | 35 | 37 | 36 | 36 | 39 | 39 | 39 | 40 | 39 | 40 | 42 | 44 | 41 | 42 | 42 | 44 | 44 | 46 | 45 | 46 | 46 | 48 | 48 | 48         | 49 | 49 |    |    |
| 15      |     | 35 | 36 | 38 | 38 | 39 | 39 | 42 | 39 | 41 | 43 | 42 | 42 | 44 | 44 | 43 | 43 | 43 | 45 | 45 | 44 | 46 | 47 | 48 | 47 | 47 | 46         | 47 | 48 |    |    |
| 16      |     | 35 | 35 | 35 | 35 | 36 | 37 | 37 | 38 | 37 | 39 | 40 | 39 | 41 | 42 | 42 | 42 | 43 | 45 | 46 | 45 | 48 | 49 | 53 | 53 | 52 | 53         | 53 | 54 |    |    |
| 20      |     | 36 | 36 | 37 | 39 | 39 | 42 | 41 | 41 | 44 | 44 | 45 | 47 | 48 | 49 | 48 | 48 | 50 | 50 | 51 | 51 | 52 | 54 | 54 | 54 | 53 | 53         | 57 | 56 |    |    |
| Avg (g) |     | 37 | 37 | 37 | 38 | 38 | 40 | 40 | 41 | 41 | 41 | 41 | 41 | 41 | 42 | 42 | 42 | 42 | 42 | 42 | 43 | 44 | 44 | 44 | 45 | 46 | 46         | 46 | 45 | 46 | 46 |
| SD      |     | 3  | 3  | 4  | 4  | 4  | 4  | 4  | 4  | 4  | 4  | 4  | 5  | 4  | 5  | 5  | 5  | 5  | 5  | 5  | 6  | 5  | 6  | 6  | 7  | 7  | 7          | 7  | 7  | 7  |    |

**Genotype: *PCBP4*<sup>+/-</sup>**

| ID      | Wks | 18 | 19 | 20 | 21 | 22 | 23 | 24 | 25 | 26 | 27 | 28 | 29 | 30 | 31 | 32 | 33 | 34 | 35 | 36 | 37 | 38 | 39 | 40 | 41 | 42 | 43         | 44 | 45 |    |
|---------|-----|----|----|----|----|----|----|----|----|----|----|----|----|----|----|----|----|----|----|----|----|----|----|----|----|----|------------|----|----|----|
| 54      |     |    |    |    |    |    | 39 | 39 | 38 | 36 | 36 | 35 | 36 | 37 | 36 | 35 | 36 | 35 | 35 | 35 | 35 | 37 | 35 | 33 | 33 | 32 | Euthanized |    |    |    |
| 57      |     |    |    |    | 37 | 37 | 38 | 37 | 38 | 38 | 39 | 38 | 40 | 37 | 38 | 38 | 37 | 38 | 38 | 39 | 38 | 39 | 39 | 39 | 39 | 40 | 40         | 40 | 40 |    |
| 82      |     |    |    |    | 40 | 40 | 40 | 40 | 40 | 41 | 40 | 40 | 41 | 41 | 39 | 41 | 40 | 40 | 42 | 43 | 42 | 43 | 44 | 44 | 45 | 45 | 46         | 46 | 47 |    |
| 83      |     |    |    |    | 38 | 39 | 38 | 38 | 38 | 38 | 38 | 38 | 39 | 38 | 39 | 38 | 40 | 39 | 39 | 41 | 40 | 40 | 40 | 41 | 40 | 41 | 41         | 41 | 42 | 42 |
| 90      |     | 38 | 38 | 39 | 41 | 43 | 43 | 44 | 44 | 44 | 44 | 45 | 46 | 48 | 48 | 47 | 49 | 49 | 50 | 49 | 50 | 51 | 51 | 51 | 51 | 52 | 51         | 52 | 54 |    |
| 95      |     | 30 | 30 | 30 | 30 | 30 | 29 | 31 | 31 | 31 | 31 | 31 | 33 | 32 | 32 | 33 | 33 | 32 | 33 | 34 | 34 | 34 | 35 | 35 | 34 | 35 | 35         | 35 | 35 |    |
| 2       |     | 36 | 37 | 37 | 38 | 36 | 39 | 40 | 42 | 40 | 41 | 42 | 43 | 43 | 44 | 45 | 44 | 45 | 47 | 47 | 46 | 48 | 47 | 49 | 49 | 49 | 49         | 48 | 49 | 49 |
| 4       |     | 32 | 33 | 33 | 34 | 33 | 35 | 36 | 38 | 36 | 35 | 38 | 39 | 37 | 39 | 40 | 39 | 40 | 40 | 40 | 40 | 42 | 42 | 43 | 44 | 44 | 43         | 44 | 44 |    |
| 10      |     | 30 | 34 | 34 | 34 | 35 | 34 | 35 | 35 | 36 | 36 | 37 | 37 | 36 | 37 | 37 | 37 | 37 | 37 | 37 | 35 | 36 | 37 | 38 | 35 | 34 | 36         | 35 | 35 |    |
| 14      |     | 29 | 31 | 31 | 32 | 33 | 33 | 33 | 34 | 33 | 35 | 35 | 35 | 36 | 36 | 36 | 38 | 37 | 39 | 38 | 38 | 39 | 40 | 41 | 41 | 41 | 44         | 42 | 43 |    |
| 18      |     | 30 | 31 | 32 | 32 | 33 | 31 | 35 | 32 | 32 | 33 | 33 | 32 | 35 | 35 | 34 | 34 | 34 | 35 | 35 | 36 | 36 | 36 | 37 | 37 | 37 | 38         | 38 | 37 |    |
| 22      |     | 35 | 36 | 37 | 39 | 39 | 43 | 42 | 41 | 44 | 44 | 44 | 46 | 48 | 48 | 49 | 50 | 49 | 49 | 50 | 50 | 49 | 48 | 48 | 49 | 49 | 51         | 52 | 51 |    |
| Avg (g) |     | 33 | 34 | 35 | 36 | 36 | 37 | 37 | 38 | 37 | 38 | 38 | 39 | 39 | 40 | 40 | 40 | 40 | 40 | 41 | 41 | 41 | 42 | 42 | 42 | 42 | 42         | 43 | 43 | 43 |
| SD      |     | 3  | 3  | 4  | 4  | 4  | 5  | 4  | 4  | 4  | 4  | 4  | 5  | 5  | 5  | 5  | 6  | 6  | 6  | 5  | 6  | 6  | 5  | 5  | 6  | 6  | 6          | 6  | 6  |    |

**Genotype: *PCBP4*<sup>-/-</sup>**

| ID      | Wks | 18 | 19 | 20 | 21 | 22 | 23 | 24 | 25 | 26 | 27 | 28 | 29 | 30 | 31 | 32 | 33 | 34 | 35 | 36 | 37 | 38 | 39 | 40 | 41 | 42 | 43 | 44 | 45 |    |
|---------|-----|----|----|----|----|----|----|----|----|----|----|----|----|----|----|----|----|----|----|----|----|----|----|----|----|----|----|----|----|----|
| 64      |     |    |    |    |    | 39 | 38 | 37 | 36 | 35 | 35 | 35 | 35 | 36 | 35 | 35 | 36 | 36 | 37 | 38 | 38 | 37 | 39 | 39 | 40 | 40 | 42 | 43 | 43 | 43 |
| 74      |     |    |    |    | 29 | 30 | 30 | 29 | 29 | 29 | 30 | 30 | 33 | 30 | 32 | 31 | 31 | 31 | 31 | 31 | 32 | 31 | 31 | 32 | 31 | 33 | 33 | 33 | 34 | 34 |
| 91      |     | 27 | 26 | 26 | 26 | 26 | 27 | 27 | 28 | 30 | 28 | 28 | 28 | 29 | 29 | 29 | 29 | 26 | 27 | 29 | 27 | 29 | 29 | 30 | 30 | 29 | 30 | 30 | 29 | 29 |
| Avg (g) |     | 27 | 26 | 28 | 32 | 31 | 31 | 31 | 31 | 32 | 31 | 32 | 31 | 32 | 32 | 32 | 32 | 31 | 32 | 33 | 32 | 32 | 33 | 34 | 34 | 34 | 35 | 35 | 35 | 35 |
| SD      |     |    |    |    | 2  | 7  | 6  | 5  | 5  | 4  | 3  | 4  | 4  | 4  | 3  | 3  | 4  | 5  | 5  | 5  | 6  | 4  | 5  | 5  | 6  | 6  | 6  | 7  | 7  | 7  |

**Table S4.** Wild-type mice – survival time and tumor spectrum

| <b>ID</b> | <b>Genotype</b>      | <b>Survival (wks)</b> | <b>Pathological diagnosis</b> |
|-----------|----------------------|-----------------------|-------------------------------|
| 45        | PCBP4 <sup>+/+</sup> | 152.4                 | No tumor found                |
| 48        | PCBP4 <sup>+/+</sup> | 149.4                 | No tumor found                |
| 80-1      | PCBP4 <sup>+/+</sup> | 138.1                 | No tumor found                |
| 21        | PCBP4 <sup>+/+</sup> | 124.6                 | lymphoma                      |
| 58        | PCBP4 <sup>+/+</sup> | 117.3                 | lymphoma                      |
| 33-1      | PCBP4 <sup>+/+</sup> | 111.3                 | lymphoma                      |
| 12        | PCBP4 <sup>+/+</sup> | 110.4                 | lymphoma                      |
| 65        | PCBP4 <sup>+/+</sup> | 110.0                 | lymphoma                      |
| 74        | PCBP4 <sup>+/+</sup> | 98.7                  | No tumor found                |
| 60        | PCBP4 <sup>+/+</sup> | 96.3                  | No tumor found                |
| 99        | PCBP4 <sup>+/+</sup> | 91.0                  | No tumor found                |
| 24        | PCBP4 <sup>+/+</sup> | 62.9                  | No tumor found                |
| 50        | PCBP4 <sup>+/+</sup> | 47.1                  | No tumor found                |
| 80-2      | PCBP4 <sup>+/+</sup> | 38.0                  | No tumor found                |
| 84        | PCBP4 <sup>+/+</sup> | 37.4                  | No tumor found                |

**Table S5.** PCBP4<sup>+/-</sup> mice – survival time and tumor spectrum

| <b>ID</b> | <b>Genotype</b>      | <b>Survival (wks)</b> | <b>Pathological diagnosis</b>                   |
|-----------|----------------------|-----------------------|-------------------------------------------------|
| 53        | PCBP4 <sup>+/-</sup> | 103.1                 | No tumor found                                  |
| 47-1      | PCBP4 <sup>+/-</sup> | 140.9                 | Lymphoma, lung adenocarcinoma, and kidney tumor |
| 82        | PCBP4 <sup>+/-</sup> | 137.7                 | Lymphoma and intestinal adenoma                 |
| 22        | PCBP4 <sup>+/-</sup> | 97.3                  | Lymphoma and intestinal adenoma                 |
| 57        | PCBP4 <sup>+/-</sup> | 102.1                 | Lymphoma and lung adenocarcinoma                |
| 2         | PCBP4 <sup>+/-</sup> | 129.7                 | Lung adenocarcinoma                             |
| 83        | PCBP4 <sup>+/-</sup> | 111.9                 | Lymphoma                                        |
| 67        | PCBP4 <sup>+/-</sup> | 91.4                  | Lymphoma                                        |
| 81        | PCBP4 <sup>+/-</sup> | 105.3                 | Lymphoma                                        |
| 52        | PCBP4 <sup>+/-</sup> | 99.4                  | Lymphoma and skin squamous cell carcinoma       |
| 97-1      | PCBP4 <sup>+/-</sup> | 90.1                  | Lymphoma                                        |
| 47-2      | PCBP4 <sup>+/-</sup> | 49.9                  | No tumor found                                  |
| 12-15-2   | PCBP4 <sup>+/-</sup> | 55.1                  | Lymphoma                                        |
| 90        | PCBP4 <sup>+/-</sup> | 38.6                  | No tumor found                                  |
| 87        | PCBP4 <sup>+/-</sup> | 37.4                  | No tumor found                                  |

**Table S6.** PCBP4<sup>-/-</sup> mice – survival time and tumor spectrum

| <b>ID</b> | <b>Genotype</b>      | <b>Survival (wks)</b> | <b>Pathological diagnosis</b>                   |
|-----------|----------------------|-----------------------|-------------------------------------------------|
| 78        | PCBP4 <sup>-/-</sup> | 141.9                 | Lymphoma                                        |
| 46-1      | PCBP4 <sup>-/-</sup> | 140.9                 | Lymphoma                                        |
| 72        | PCBP4 <sup>-/-</sup> | 133.0                 | Lymphoma and lung adenocarcinoma                |
| 89        | PCBP4 <sup>-/-</sup> | 100.6                 | Lymphoma, lung adenocarcinoma, and kidney tumor |
| 46-2      | PCBP4 <sup>-/-</sup> | 117.9                 | Lymphoma                                        |
| 36        | PCBP4 <sup>-/-</sup> | 135.4                 | Lymphoma and lung squamous cell carcinoma       |
| 75        | PCBP4 <sup>-/-</sup> | 114.7                 | Lymphoma and lung adenocarcinoma                |
| 64        | PCBP4 <sup>-/-</sup> | 73.0                  | Lymphoma                                        |
| 79        | PCBP4 <sup>-/-</sup> | 105.3                 | Lymphoma                                        |
| 73        | PCBP4 <sup>-/-</sup> | 60.7                  | Lymphoma                                        |
| 91        | PCBP4 <sup>-/-</sup> | 98.4                  | Lymphoma                                        |
| 65        | PCBP4 <sup>-/-</sup> | 38.3                  | Lymphoma                                        |
| 2-28      | PCBP4 <sup>-/-</sup> | 23.3                  | Found dead, no tissues for diagnosis            |
| 30        | PCBP4 <sup>-/-</sup> | 42.1                  | No tumor found                                  |
| 82        | PCBP4 <sup>-/-</sup> | 37.4                  | Lymphoma                                        |
| 51        | PCBP4 <sup>-/-</sup> | 39.6                  | Lymphoma                                        |

**Table S7: RNA-seq data.** The levels of PCBP4, p21, and Puma transcripts in lung cancer with wild-type vs. mutant p53 (means  $\pm$  SDs)

| Gene  | Lung cancer with wild-type p53<br>(n=123) | Lung cancer with mutant p53<br>(n=228) | <i>p</i> value |
|-------|-------------------------------------------|----------------------------------------|----------------|
| PCBP4 | 8.831 $\pm$ 0.666                         | 8.563 $\pm$ 0.718                      | 0.000286526    |
| p21   | 11.748 $\pm$ 0.761                        | 11.402 $\pm$ 0.871                     | 0.000071816    |
| Puma  | 7.358 $\pm$ 0.718                         | 6.958 $\pm$ 0.741                      | 0.000000798    |

Note: RNA-seq data (1,124 cases) and gene mutation data (408 cases) were downloaded from TCGA Lung Cancer database. After comparing RNA-seq data with gene mutation data, both the level of PCBP4 transcript and the status of the *p53* gene were found to be analyzed in 351 cases of lung cancer. Among 351 cases, 123 cases had wild-type p53 and 228 cases had mutant p53.

**Table S8: Microarray data.** The levels of PCBP4, p21, and Puma transcripts in lung cancer with wild-type vs. mutant p53 (means  $\pm$  SDs)

| Gene  | Lung cancer with wild-type p53<br>(n=30) | Lung cancer with mutant p53<br>(n=114) | <i>p</i> value |
|-------|------------------------------------------|----------------------------------------|----------------|
| PCBP4 | -0.484 $\pm$ 0.512                       | -0.788 $\pm$ 0.453                     | 0.002466       |
| p21   | 0.810 $\pm$ 0.575                        | 0.670 $\pm$ 0.778                      | 0.139812       |
| Puma  | 0.023 $\pm$ 0.440                        | -0.026 $\pm$ 0.382                     | 0.286264       |

Note: Microarray data (188 cases) and gene mutation data (408 cases) were downloaded from TCGA Lung Cancer database. After comparing microarray data with gene mutation data, both the level of PCBP4 transcript and the status of the *p53* gene were found to be analyzed in 144 cases. Among 144 cases, 30 cases had wild-type p53 and 114 cases had mutant p53.



**Table S9.** mRNAs associated with anti-PCBP4 immunoprecipitates in WT vs. *PCBP4*<sup>-/-</sup> MEFs

| Gene ID | Description                                                   | WT values | PCBP4 <sup>-/-</sup> values | Fold(WT/PCBP4 <sup>-/-</sup> ) |
|---------|---------------------------------------------------------------|-----------|-----------------------------|--------------------------------|
| Ptn     | pleiotrophin [[MGI:97804]                                     | 1710.3    | 79.7                        | 21.5                           |
| Igf2    | insulin-like growth factor 2                                  | 1583.9    | 1078.3                      | 1.5                            |
| Fn1     | fibronectin 1 [[MGI:95566]                                    | 1579.9    | 1514.4                      | 1.0                            |
| Arf3    | ADP-ribosylation factor 3                                     | 1525.3    | 689.3                       | 2.2                            |
| Pabpc1  | poly A binding protein, cytoplasmic 1                         | 1407.4    | 590.8                       | 2.4                            |
| MYADM   | myeloid-associated differentiation marker (Myadm), transcript | 1349.0    | 1015.2                      | 1.3                            |
| Grem1   | gremlin 1                                                     | 1343.3    | 129.9                       | 10.3                           |
| Thbs1   | thrombospondin 1                                              | 1143.0    | 314.3                       | 3.6                            |
| Sparc   | secreted acidic cysteine rich glycoprotein                    | 1100.8    | 406.5                       | 2.7                            |
| Bgn     | biglycan                                                      | 1070.9    | 1423.3                      | 0.8                            |
| Ccnd2   | cyclin D2 [[MGI:88314]                                        | 1036.0    | 160.1                       | 6.5                            |
| Lox     | lysyl oxidase [[MGI:96817]                                    | 996.3     | 185.4                       | 5.4                            |
| Ftl1    | ferritin light chain 1                                        | 942.1     | 1005.6                      | 0.9                            |
| Col8a1  | procollagen type VIII alpha 1                                 | 816.4     | 39.0                        | 20.9                           |
| Cfl1    | cofilin 1, non-muscle [[MGI:101757]                           | 735.9     | 2703.4                      | 0.3                            |
| Arhgdia | Rho GDP dissociation inhibitor (GDI) alpha                    | 710.5     | 1223.1                      | 0.6                            |
| Npm1    | nucleophosmin 1                                               | 648.4     | 30.7                        | 21.1                           |
| Lrrc58  | leucine rich repeat containing 58                             | 623.9     | 69.4                        | 9.0                            |
| Csde1   | cold shock domain containing E1, RNA binding [[MGI:92356]     | 606.4     | 30.3                        | 20.0                           |
| Tpm4    | tropomyosin 4                                                 | 587.4     | 37.6                        | 15.6                           |
| Timp2   | tissue inhibitor of metalloproteinase 2                       | 584.3     | 482.2                       | 1.2                            |
| Fstl1   | follistatin-like 1                                            | 578.9     | 91.0                        | 6.4                            |
| Ccng1   | cyclin G1                                                     | 576.8     | 62.4                        | 9.3                            |
| Spp1    | secreted phosphoprotein 1                                     | 553.2     | 108.5                       | 5.1                            |
| Eef1a1  | eukaryotic translation elongation factor 1 alpha 1            | 492.5     | 74.6                        | 6.6                            |
| Inhba   | inhibin beta-A [[MGI:96570]                                   | 457.9     | 83.6                        | 5.5                            |
| Colla1  | procollagen type I alpha 1                                    | 425.4     | 501.9                       | 0.8                            |
| Tpm1    | tropomyosin 1, alpha                                          | 417.9     | 96.8                        | 4.3                            |
| Ywhaz   | tyrosine 3-monooxygenase/tryptophan 5-monooxygenase           | 364.3     | 178.5                       | 2.0                            |
| Gnb1    | guanine nucleotide binding protein, beta 1                    | 359.1     | 164.8                       | 2.2                            |
| Ccnd1   | cyclin D1                                                     | 351.1     | 34.5                        | 10.2                           |
| Eif4g2  | eukaryotic translation initiation factor 4, gamma 2           | 336.2     | 87.5                        | 3.8                            |
| Cald1   | caldesmon 1                                                   | 323.1     | 47.5                        | 6.8                            |
| Vim     | vimentin                                                      | 321.2     | 162.2                       | 2.0                            |
| Hmga2   | high mobility group AT-hook 2                                 | 298.0     | 129.0                       | 2.3                            |
| F2r     | coagulation factor II (thrombin) receptor [[MGI:101802]       | 292.2     | 56.2                        | 5.2                            |
| Ssr3    | signal sequence receptor, gamma                               | 288.4     | 32.7                        | 8.8                            |
| Ccni    | cyclin I                                                      | 285.3     | 55.3                        | 5.2                            |
| Calr    | calreticulin                                                  | 274.0     | 51.4                        | 5.3                            |
| Itgb1   | integrin beta 1 (fibronectin receptor beta)                   | 265.3     | 52.6                        | 5.0                            |
| Lars2   | leucyl-tRNA synthetase, mitochondrial [[MGI:2142973]          | 261.7     | 527.1                       | 0.5                            |

|          |                                                                  |       |       |      |
|----------|------------------------------------------------------------------|-------|-------|------|
| Zfp871   | zinc finger protein 871                                          | 255.5 | 11.0  | 23.2 |
| Cd81     | CD 81 antigen                                                    | 252.4 | 78.4  | 3.2  |
| Timp3    | tissue inhibitor of metalloproteinase 3                          | 240.6 | 65.3  | 3.7  |
| Bsg      | basigin                                                          | 236.1 | 222.5 | 1.1  |
| Pfn1     | profilin 1                                                       | 233.6 | 364.9 | 0.6  |
| Smarca4  | SWI/SNF related, matrix associated, actin dependent regulator of | 228.0 | 104.9 | 2.2  |
| Fth1     | ferritin heavy chain 1 [[MGI:95588]]                             | 227.1 | 35.5  | 6.4  |
| Ywhae    | tyrosine 3-monooxygenase/tryptophan 5-monooxygenase              | 225.9 | 187.5 | 1.2  |
| Tnc      | tenascin C (hexabrachion)                                        | 223.6 | 207.3 | 1.1  |
| Scd2     | stearoyl-Coenzyme A desaturase 2 [[MGI:98240]]                   | 220.0 | 78.4  | 2.8  |
| Mrfap1   | Morf4 family associated protein 1                                | 219.7 | 39.0  | 5.6  |
| Ybx1     | Y box protein 1                                                  | 218.7 | 41.3  | 5.3  |
| Rnd3     | Rho family GTPase 3                                              | 218.2 | 14.7  | 14.9 |
| Hsp90ab1 | heat shock protein 90kDa alpha (cytosolic), class B member 1     | 214.0 | 45.7  | 4.7  |
| Gsk3b    | glycogen synthase kinase 3 beta                                  | 211.6 | 27.8  | 7.6  |
| Rab7     | RAB7, member RAS oncogene family                                 | 211.2 | 58.5  | 3.6  |
| Kdelr2   | KDEL (Lys-Asp-Glu-Leu) endoplasmic reticulum protein             | 204.0 | 32.9  | 6.2  |
| Pcbp2    | poly(rC) binding protein 2 [[MGI:108202]]                        | 202.9 | 125.9 | 1.6  |
| Rplp1    | ribosomal protein, large, P1 [[MGI:1927099]]                     | 200.6 | 66.5  | 3.0  |
| Sh3bgrl  | SH3-binding domain glutamic acid-rich protein like               | 200.1 | 15.2  | 13.2 |
| Canx     | calnexin                                                         | 199.9 | 19.7  | 10.2 |
| Ptges3   | prostaglandin E synthase 3 (cytosolic)                           | 199.8 | 16.3  | 12.2 |
| Klf6     | Kruppel-like factor 6 [[MGI:1346318]]                            | 195.2 | 18.8  | 10.4 |
| Mlec     | malectin                                                         | 192.6 | 42.4  | 4.5  |
| Trp53inp | tumor protein p53 inducible nuclear protein 2                    | 192.5 | 207.2 | 0.9  |
| Lpp      | LIM domain containing preferred translocation partner in lipoma  | 187.3 | 64.1  | 2.9  |
| Lbh      | limb-bud and heart                                               | 185.8 | 187.8 | 1.0  |
| AI597468 | expressed sequence AI597468 [[MGI:2143652]]                      | 182.7 | 12.8  | 14.3 |
| 02-Sep   | septin 2                                                         | 182.3 | 27.6  | 6.6  |
| Eef2     | eukaryotic translation elongation factor 2 [[MGI:95288]]         | 180.8 | 94.2  | 1.9  |
| Prrx1    | paired related homeobox 1                                        | 178.7 | 67.1  | 2.7  |
| Tpt1     | tumor protein, translationally-controlled 1                      | 177.5 | 19.0  | 9.3  |
| Rpl4     | ribosomal protein L4 [[MGI:1915141]]                             | 176.1 | 49.7  | 3.5  |
| Mbnl1    | muscleblind-like 1 (Drosophila) [[MGI:1928482]]                  | 169.3 | 14.3  | 11.8 |
| Tuba1a   | tubulin, alpha 1A                                                | 169.1 | 58.7  | 2.9  |
| Marcks   | myristoylated alanine rich protein kinase C substrate            | 169.0 | 18.3  | 9.2  |
| Nfix     | nuclear factor I/X                                               | 167.6 | 133.8 | 1.3  |
| B4galt1  | UDP-Gal:betaGlcNAc beta 1,4- galactosyltransferase, polypeptide  | 164.8 | 95.7  | 1.7  |
| Ctsd     | cathepsin D                                                      | 159.8 | 74.8  | 2.1  |
| Vdac1    | voltage-dependent anion channel 1                                | 158.6 | 18.7  | 8.5  |
| Msrb3    | methionine sulfoxide reductase B3                                | 157.0 | 15.2  | 10.3 |
| Rpsa     | ribosomal protein SA [[MGI:105381]]                              | 154.0 | 60.0  | 2.6  |
| Mtpn     | myotrophin                                                       | 153.7 | 22.3  | 6.9  |
| S100a11  | S100 calcium binding protein A11 (calizzarin)                    | 153.1 | 142.7 | 1.1  |
| Gm21092  | predicted gene, 21092 [[MGI:5434447]]                            | 152.7 | 22.8  | 6.7  |
| Lgals1   | lectin, galactose binding, soluble 1 [[MGI:96777]]               | 151.2 | 29.7  | 5.1  |
| Egr1     | early growth response 1                                          | 148.3 | 241.5 | 0.6  |

|          |                                                                 |       |       |      |
|----------|-----------------------------------------------------------------|-------|-------|------|
| Msn      | moesin                                                          | 143.6 | 113.8 | 1.3  |
| Emp1     | epithelial membrane protein 1                                   | 140.2 | 29.3  | 4.8  |
| Rpl32    | ribosomal protein L32                                           | 139.8 | 20.9  | 6.7  |
| Rab21    | RAB21, member RAS oncogene family [[MGI:894308]                 | 139.7 | 32.4  | 4.3  |
| Fbln2    | fibulin 2                                                       | 138.3 | 48.5  | 2.9  |
| Zcchc24  | zinc finger, CCHC domain containing 24 [[MGI:1919168]           | 137.4 | 78.9  | 1.7  |
| Scepep1  | serine carboxypeptidase 1                                       | 137.2 | 25.0  | 5.5  |
| Dkk3     | dickkopf homolog 3 ( <i>Xenopus laevis</i> ) [[MGI:1354952]     | 137.1 | 13.8  | 10.0 |
| Dpysl3   | Dihydropyrimidinase-like 3                                      | 135.8 | 36.4  | 3.7  |
| Insig1   | insulin induced gene 1                                          | 132.8 | 23.0  | 5.8  |
| Crim1    | cysteine rich transmembrane BMP regulator 1 (chordin like)      | 132.7 | 12.3  | 10.8 |
| Rpl41    | ribosomal protein L41                                           | 132.2 | 18.4  | 7.2  |
| Cdk6     | cyclin-dependent kinase 6 [[MGI:1277162]                        | 131.8 | 14.0  | 9.4  |
| S100a6   | S100 calcium binding protein A6 (calcyclin) [[MGI:1339467]      | 131.0 | 25.8  | 5.1  |
| Lrrc32   | leucine rich repeat containing 32 [[MGI:93882]                  | 130.2 | 68.6  | 1.9  |
| Ergic1   | endoplasmic reticulum-golgi intermediate compartment (ERGIC)    | 128.3 | 71.2  | 1.8  |
| Igfbp7   | insulin-like growth factor binding protein 7 [[MGI:1352480]     | 125.7 | 127.7 | 1.0  |
| Rpl5     | ribosomal protein L5                                            | 120.0 | 17.6  | 6.8  |
| Cd47     | CD47 antigen (Rh-related antigen, integrin-associated signal    | 119.7 | 62.6  | 1.9  |
| Calm1    | calmodulin 1                                                    | 119.2 | 12.3  | 9.7  |
| Ncam1    | neural cell adhesion molecule 1 [[MGI:97281]                    | 118.4 | 26.3  | 4.5  |
| Slc39a1  | solute carrier family 39 (zinc transporter), member 1           | 116.6 | 21.1  | 5.5  |
| Rps11    | ribosomal protein S11 [[MGI:1351329]                            | 114.5 | 8.5   | 13.4 |
| Cd44     | CD44 antigen                                                    | 114.4 | 51.1  | 2.2  |
| Gja1     | gap junction protein, alpha 1 [[MGI:95713]                      | 114.3 | 11.4  | 10.0 |
| Actg1    | actin, gamma, cytoplasmic 1                                     | 114.1 | 31.6  | 3.6  |
| Col1a2   | procollagen type I alpha 2                                      | 113.8 | 63.0  | 1.8  |
| Serpine1 | serine (or cysteine) peptidase inhibitor, clade E, member 1     | 113.6 | 101.7 | 1.1  |
| Srrm2    | serine/arginine repetitive matrix 2 [[MGI:1923206]              | 113.4 | 66.4  | 1.7  |
| Ids      | iduronate 2-sulfatase                                           | 112.8 | 56.7  | 2.0  |
| Rpl6     | ribosomal protein L6                                            | 112.6 | 36.7  | 3.1  |
| Ctnd1    | catenin (cadherin associated protein) delta 1                   | 112.0 | 137.4 | 0.8  |
| Mbnl2    | muscleblind-like 2 [[MGI:2145597]                               | 111.5 | 17.0  | 6.5  |
| Cdv3     | carnitine deficiency-associated gene expressed in ventricle 3   | 108.9 | 13.5  | 8.0  |
| Tead1    | TEA domain family member 1                                      | 108.4 | 131.4 | 0.8  |
| Grb10    | growth factor receptor bound protein 10                         | 106.3 | 23.3  | 4.6  |
| Samd4b   | sterile alpha motif domain containing 4B [[MGI:2448542]         | 104.0 | 290.5 | 0.4  |
| Acta2    | actin, alpha 2, smooth muscle, aorta [[MGI:87909]               | 103.7 | 76.9  | 1.3  |
| AC11987  | Novel protein (2810407C02Rik)                                   | 102.3 | 8.5   | 12.1 |
| Ttyh3    | tweety homolog 3 ( <i>Drosophila</i> ) [[MGI:1925589]           | 101.7 | 161.5 | 0.6  |
| Tpm3     | tropomyosin 3, gamma                                            | 101.6 | 17.6  | 5.8  |
| S100a4   | S100 calcium binding protein A4                                 | 101.6 | 11.8  | 8.6  |
| Laptm4a  | lysosomal-associated protein transmembrane 4A                   | 99.9  | 7.3   | 13.7 |
| Irf2bp2  | interferon regulatory factor 2 binding protein 2 [[MGI:2443921] | 97.5  | 17.3  | 5.6  |
| Zfp3611  | zinc finger protein 36, C3H type-like 1 [[MGI:107946]           | 97.2  | 103.2 | 0.9  |
| Cap1     | CAP, adenylate cyclase-associated protein 1 (yeast)             | 97.0  | 51.9  | 1.9  |
| Creb3l1  | cAMP responsive element binding protein 3-like 1                | 96.7  | 226.3 | 0.4  |

|          |                                                                 |      |       |      |
|----------|-----------------------------------------------------------------|------|-------|------|
| Nucks1   | nuclear casein kinase and cyclin-dependent kinase substrate 1   | 95.6 | 12.6  | 7.6  |
| Wwtr1    | WW domain containing transcription regulator 1                  | 94.7 | 11.5  | 8.2  |
| Sepw1    | selenoprotein W muscle 1                                        | 94.0 | 376.1 | 0.2  |
| Rps18    | ribosomal protein S18                                           | 93.8 | 27.7  | 3.4  |
| Fkbp1a   | FK506 binding protein 1a                                        | 93.7 | 92.1  | 1.0  |
| Hspa8    | heat shock protein 8                                            | 93.4 | 26.7  | 3.5  |
| Rpl10    | ribosomal protein 10                                            | 93.4 | 18.1  | 5.2  |
| Nek7     | NIMA (never in mitosis gene a)-related expressed kinase 7       | 93.4 | 9.0   | 10.4 |
| Rbms2    | RNA binding motif, single stranded interacting protein 2        | 93.0 | 57.8  | 1.6  |
| Zmat3    | zinc finger matrix type 3                                       | 92.8 | 38.9  | 2.4  |
| Postn    | periostin, osteoblast specific factor                           | 92.6 | 17.8  | 5.2  |
| 11-Sep   | septin 11 [[MGI:1277214]                                        | 91.3 | 60.0  | 1.5  |
| Ywhag    | 3-monooxygenase/tryptophan 5-monooxygenase activation           | 91.2 | 54.6  | 1.7  |
| Calm3    | calmodulin 3                                                    | 91.2 | 86.1  | 1.1  |
| My19     | myosin light polypeptide 9, regulatory                          | 91.0 | 51.8  | 1.8  |
| Ece1     | endothelin converting enzyme 1                                  | 90.4 | 24.6  | 3.7  |
| Set      | SET translocation                                               | 90.0 | 9.9   | 9.1  |
| Kpnb1    | karyopherin (importin) beta 1                                   | 88.9 | 7.8   | 11.5 |
| Ptrf     | polymerase I and transcript release factor                      | 88.5 | 31.6  | 2.8  |
| Zdhhc9   | zinc finger, DHHC domain containing 9                           | 88.2 | 68.1  | 1.3  |
| Ptma     | prothymosin alpha [[MGI:97803]                                  | 87.8 | 17.5  | 5.0  |
| Lyz2     | lysozyme 2 [[MGI:96897]                                         | 87.1 | 9.4   | 9.2  |
| Wisp1    | WNT1 inducible signaling pathway protein 1                      | 87.0 | 29.8  | 2.9  |
| F2rl1    | coagulation factor II (thrombin) receptor-like 1 [[MGI:101910]  | 86.3 | 4.9   | 17.6 |
| Nedd4    | neural precursor cell expressed, developmentally down-regulated | 86.1 | 47.9  | 1.8  |
| Nutf2    | nuclear transport factor 2 [[MGI:1915301]                       | 85.5 | 19.5  | 4.4  |
| Skp1a    | S-phase kinase-associated protein 1A                            | 84.9 | 9.4   | 9.1  |
| Nras     | neuroblastoma ras oncogene                                      | 84.9 | 11.9  | 7.2  |
| Ube2d3   | ubiquitin-conjugating enzyme E2D 3 [[MGI:1913355]               | 84.3 | 12.3  | 6.8  |
| Ctgf     | connective tissue growth factor                                 | 84.3 | 40.2  | 2.1  |
| Calu     | calumenin                                                       | 83.9 | 16.5  | 5.1  |
| Loxl2    | lysyl oxidase-like 2 [[MGI:2137913]                             | 83.4 | 47.1  | 1.8  |
| Sdc4     | syndecan 4                                                      | 82.8 | 15.8  | 5.2  |
| Lsm12    | LSM12 homolog ( <i>S. cerevisiae</i> )                          | 82.7 | 66.7  | 1.2  |
| Thy1     | thymus cell antigen 1, theta                                    | 82.6 | 170.0 | 0.5  |
| Cav1     | caveolin, caveolae protein 1                                    | 81.5 | 15.4  | 5.3  |
| Myh9     | myosin, heavy polypeptide 9, non-muscle                         | 81.2 | 64.3  | 1.3  |
| Ugcg     | UDP-glucose ceramide glucosyltransferase                        | 80.1 | 35.4  | 2.3  |
| Flrt2    | fibronectin leucine rich transmembrane protein 2                | 79.8 | 9.8   | 8.1  |
| Rplp2    | ribosomal protein, large P2                                     | 79.7 | 10.6  | 7.5  |
| Rpl18a   | ribosomal protein L18A [[MGI:1924058]                           | 79.7 | 21.2  | 3.8  |
| Il1r1    | interleukin 1 receptor-like 1                                   | 79.5 | 36.3  | 2.2  |
| Cdh11    | cadherin 11 [[MGI:99217]                                        | 79.4 | 20.7  | 3.8  |
| Gm7292   | predicted gene 7292 [[MGI:3645786]                              | 79.3 | 42.0  | 1.9  |
| Slc39a13 | solute carrier family 39 (metal ion transporter), member 13     | 78.5 | 70.6  | 1.1  |
| Pmaip1   | phorbol-12-myristate-13-acetate-induced protein 1               | 78.5 | 8.4   | 9.3  |
| Ube2r2   | ubiquitin-conjugating enzyme E2R 2                              | 78.3 | 23.4  | 3.3  |

|          |                                                                          |      |       |      |
|----------|--------------------------------------------------------------------------|------|-------|------|
| Ctsb     | cathepsin B [[MGI:88561]                                                 | 78.2 | 73.5  | 1.1  |
| Ctdnep1  | Dullard homolog ( <i>Xenopus laevis</i> ) (novel NLI interacting factor- | 78.1 | 87.4  | 0.9  |
| Dusp3    | dual specificity phosphatase 3 (vaccinia virus phosphatase VH1-          | 77.0 | 10.6  | 7.3  |
| Antxr1   | anthrax toxin receptor 1 [[MGI:1916788]                                  | 77.0 | 32.0  | 2.4  |
| Setd7    | SET domain containing (lysine methyltransferase) 7                       | 76.5 | 37.4  | 2.0  |
| Gnas     | GNAS (guanine nucleotide binding protein, alpha stimulating)             | 76.2 | 23.8  | 3.2  |
| Cyp1b1   | cytochrome P450, family 1, subfamily b, polypeptide 1                    | 75.9 | 18.5  | 4.1  |
| Tnfrsf23 | tumor necrosis factor receptor superfamily, member 23                    | 75.9 | 75.8  | 1.0  |
| Ywhab    | tyrosine 3-monooxygenase/tryptophan 5-monooxygenase                      | 75.6 | 19.8  | 3.8  |
| Eif2s3x  | eukaryotic translation initiation factor 2, subunit 3, structural gene   | 75.4 | 15.4  | 4.9  |
| Ckap4    | cytoskeleton-associated protein 4 [[MGI:2444926]                         | 75.3 | 48.4  | 1.6  |
| Tuba1b   | tubulin, alpha 1B                                                        | 75.3 | 41.8  | 1.8  |
| Rps10    | ribosomal protein S10                                                    | 75.3 | 18.8  | 4.0  |
| Bmpr2    | bone morphogenetic protein receptor, type II (serine/threonine           | 75.0 | 14.6  | 5.1  |
| Impact   | imprinted and ancient [[MGI:1098233]                                     | 74.6 | 15.5  | 4.8  |
| Mcart1   | mitochondrial carrier triple repeat 1                                    | 74.4 | 37.3  | 2.0  |
| Dstn     | destrin                                                                  | 74.3 | 11.5  | 6.4  |
| RP23-    | Novel protein (D17Wsu104e)                                               | 74.2 | 7.5   | 9.9  |
| Nufip2   | nuclear fragile X mental retardation protein interacting protein 2       | 72.9 | 7.9   | 9.2  |
| Rps15    | ribosomal protein S15                                                    | 72.2 | 26.8  | 2.7  |
| Capzb    | capping protein (actin filament) muscle Z-line, beta                     | 71.8 | 135.3 | 0.5  |
| Tmem127  | transmembrane protein 127                                                | 71.1 | 26.3  | 2.7  |
| Rplp0    | ribosomal protein, large, P0                                             | 69.9 | 14.8  | 4.7  |
| Cyb5r3   | cytochrome b5 reductase 3                                                | 69.6 | 26.2  | 2.7  |
| Calm2    | calmodulin 2                                                             | 69.5 | 10.5  | 6.6  |
| Ddx6     | DEAD (Asp-Glu-Ala-Asp) box polypeptide 6 [[MGI:104976]                   | 68.8 | 8.7   | 7.9  |
| Cbx3     | chromobox homolog 3 ( <i>Drosophila</i> HP1 gamma)                       | 68.6 | 3.2   | 21.7 |
| Cyb5b    | cytochrome b5 type B [[MGI:1913677]                                      | 68.4 | 16.4  | 4.2  |
| Rps3a    | ribosomal protein S3A                                                    | 68.2 | 11.7  | 5.8  |
| Tspan31  | tetraspanin 31 [[MGI:1914375]                                            | 68.2 | 8.0   | 8.5  |
| Crabp1   | cellular retinoic acid binding protein I                                 | 67.9 | 49.0  | 1.4  |
| Spes3    | signal peptidase complex subunit 3 homolog ( <i>S. cerevisiae</i> )      | 67.9 | 6.7   | 10.1 |
| Rpl13a   | ribosomal protein L13a                                                   | 67.6 | 17.5  | 3.9  |
| RP23-    | novel protein (B230120H23Rik)                                            | 67.3 | 15.8  | 4.3  |
| Atn1     | atrophin 1                                                               | 66.9 | 157.1 | 0.4  |
| Impad1   | inositol monophosphatase domain containing 1                             | 66.8 | 13.3  | 5.0  |
| Fscn1    | fascin homolog 1, actin bundling protein ( <i>Strongylocentrotus</i>     | 66.6 | 171.4 | 0.4  |
| Ccdc80   | coiled-coil domain containing 80                                         | 65.5 | 26.1  | 2.5  |
| Nid1     | nidogen 1 [[MGI:97342]                                                   | 64.6 | 91.6  | 0.7  |
| Pbx1     | pre B-cell leukemia transcription factor 1                               | 64.6 | 22.2  | 2.9  |
| Vat1     | vesicle amine transport protein 1 homolog ( <i>T. californica</i> )      | 64.2 | 68.6  | 0.9  |
| Il1rn    | interleukin 1 receptor antagonist                                        | 63.8 | 10.5  | 6.1  |
| Ccl7     | chemokine (C-C motif) ligand 7                                           | 63.6 | 1.8   | 35.1 |
| Gns      | glucosamine (N-acetyl)-6-sulfatase [[MGI:1922862]                        | 63.4 | 33.9  | 1.9  |
| Arf6     | ADP-ribosylation factor 6 [[MGI:99435]                                   | 63.4 | 15.3  | 4.1  |
| Arl5a    | ADP-ribosylation factor-like 5A                                          | 63.2 | 11.7  | 5.4  |
| Psm11    | proteasome (prosome, macropain) 26S subunit, non-ATPase, 11              | 62.7 | 63.2  | 1.0  |

|          |                                                               |      |       |      |
|----------|---------------------------------------------------------------|------|-------|------|
| Itgav    | integrin alpha V                                              | 62.6 | 15.9  | 3.9  |
| B230219  | RIKEN cDNA B230219D22 gene [[MGI:1925771]                     | 62.6 | 12.8  | 4.9  |
| Tmed2    | transmembrane emp24 domain trafficking protein 2              | 62.2 | 11.2  | 5.6  |
| Bmpr1a   | bone morphogenetic protein receptor, type 1A                  | 62.1 | 7.3   | 8.5  |
| Ap3s1    | adaptor-related protein complex 3, sigma 1 subunit            | 62.1 | 3.8   | 16.4 |
| Mat2a    | methionine adenosyltransferase II, alpha [[MGI:2443731]       | 61.8 | 6.6   | 9.4  |
| Ccnk     | cyclin K [[MGI:1276106]                                       | 61.7 | 25.6  | 2.4  |
| App      | amyloid beta (A4) precursor protein [[MGI:88059]              | 61.0 | 39.1  | 1.6  |
| Gng12    | guanine nucleotide binding protein (G protein), gamma 12      | 60.4 | 16.9  | 3.6  |
| Col5a1   | procollagen type V alpha 1                                    | 60.3 | 65.0  | 0.9  |
| Il6st    | interleukin 6 signal transducer [[MGI:96560]                  | 60.2 | 13.0  | 4.6  |
| Fam198b  | novel protein (1110032E23Rik)                                 | 60.1 | 14.0  | 4.3  |
| Rps23    | ribosomal protein S23 [[MGI:1913725]                          | 59.9 | 12.5  | 4.8  |
| Tbl1x    | transducin (beta)-like 1 X-linked                             | 59.9 | 40.2  | 1.5  |
| Slc38a2  | solute carrier family 38, member 2 [[MGI:1915010]             | 59.8 | 10.9  | 5.5  |
| Tubb5    | tubulin, beta 5                                               | 59.5 | 37.8  | 1.6  |
| Hmgn1    | high mobility group nucleosomal binding domain 1              | 59.5 | 5.3   | 11.1 |
| Rps4x    | ribosomal protein S4 X-linked                                 | 58.9 | 11.5  | 5.1  |
| Rps29    | ribosomal protein S29                                         | 58.6 | 4.4   | 13.2 |
| Actr2    | ARP2 actin-related protein 2 homolog (yeast)                  | 58.5 | 6.7   | 8.8  |
| Lrrc8a   | leucine rich repeat containing 8A                             | 58.4 | 25.5  | 2.3  |
| Foxp1    | forkhead box P1                                               | 58.4 | 7.5   | 7.8  |
| RP23-    | novel protein (9530068E07Rik)                                 | 58.1 | 11.8  | 4.9  |
| Sorbs3   | sorbin and SH3 domain containing 3 [[MGI:700013]              | 57.8 | 90.6  | 0.6  |
| Rab1     | RAB1, member RAS oncogene family                              | 57.8 | 19.6  | 2.9  |
| Hmox1    | heme oxygenase (decycling) 1                                  | 57.6 | 14.5  | 4.0  |
| Scd1     | stearoyl-Coenzyme A desaturase 1 [[MGI:98239]                 | 57.5 | 27.3  | 2.1  |
| Fhl3     | four and a half LIM domains 3                                 | 56.9 | 46.1  | 1.2  |
| Rbms1    | RNA binding motif, single stranded interacting protein 1      | 56.9 | 12.1  | 4.7  |
| Tram2    | translocating chain-associating membrane protein 2            | 56.8 | 52.1  | 1.1  |
| Tmed9    | transmembrane emp24 protein transport domain containing 9     | 55.9 | 5.1   | 10.9 |
| Ybx3     | Y box protein 3 [[MGI:2137670]                                | 55.7 | 16.9  | 3.3  |
| Ak1      | adenylate kinase 1                                            | 55.6 | 16.1  | 3.5  |
| Tgfbr2   | transforming growth factor, beta receptor II [[MGI:98729]     | 55.5 | 24.4  | 2.3  |
| Hsp90b1  | heat shock protein 90kDa beta (Grp94), member 1               | 55.2 | 10.8  | 5.1  |
| Mdm2     | transformed mouse 3T3 cell double minute 2                    | 55.2 | 11.5  | 4.8  |
| Tmem106  | transmembrane protein 106B                                    | 54.8 | 12.8  | 4.3  |
| Fam160b  | family with sequence similarity 160, member B2 [[MGI:3036290] | 54.8 | 7.8   | 7.0  |
| Max      | Max protein [[MGI:96921]                                      | 54.7 | 34.1  | 1.6  |
| Tcf4     | transcription factor 4                                        | 54.7 | 7.0   | 7.9  |
| Cdkn1a   | cyclin-dependent kinase inhibitor 1A (P21)                    | 54.5 | 119.4 | 0.5  |
| Gosr2    | golgi SNAP receptor complex member 2                          | 54.4 | 14.8  | 3.7  |
| Serpinh1 | serine (or cysteine) peptidase inhibitor, clade H, member 1   | 54.4 | 42.2  | 1.3  |
| Zfand2a  | zinc finger, AN1-type domain 2A                               | 54.4 | 7.2   | 7.5  |
| Arf4     | ADP-ribosylation factor 4                                     | 54.3 | 24.2  | 2.2  |
| Tulp3    | tubby-like protein 3                                          | 54.2 | 16.5  | 3.3  |
| Nrep     | neuronal regeneration related protein [[MGI:99444]            | 53.9 | 9.7   | 5.6  |

|          |                                                                          |      |       |      |
|----------|--------------------------------------------------------------------------|------|-------|------|
| Ppic     | peptidylprolyl isomerase C [[MGI:97751]                                  | 53.6 | 15.7  | 3.4  |
| P4ha3    | procollagen-proline, 2-oxoglutarate 4-dioxygenase (proline 4-            | 53.6 | 4.4   | 12.3 |
| Ddx3x    | DEAD/H (Asp-Glu-Ala-Asp/His) box polypeptide 3, X-linked                 | 53.5 | 14.5  | 3.7  |
| Arhgdib  | Rho, GDP dissociation inhibitor (GDI) beta                               | 53.4 | 68.1  | 0.8  |
| Casc4    | cancer susceptibility candidate 4                                        | 53.2 | 4.5   | 11.7 |
| Rps24    | ribosomal protein S24 [[MGI:98147]                                       | 53.2 | 9.7   | 5.5  |
| Rpl11    | ribosomal protein L11                                                    | 53.1 | 16.0  | 3.3  |
| Abhd2    | abhydrolase domain containing 2                                          | 52.5 | 21.5  | 2.4  |
| Rpl23    | ribosomal protein L23                                                    | 51.2 | 7.6   | 6.7  |
| Cyb5r1   | cytochrome b5 reductase 1                                                | 51.2 | 5.4   | 9.4  |
| Dusp1    | dual specificity phosphatase 1                                           | 51.1 | 24.9  | 2.1  |
| Mob1a    | MOB1, Mps One Binder kinase activator-like 1B (yeast)                    | 51.0 | 8.2   | 6.2  |
| Gnai2    | guanine nucleotide binding protein (G protein), alpha inhibiting 2       | 50.8 | 113.9 | 0.4  |
| Cdk16    | PCTAIRE-motif protein kinase 1                                           | 50.7 | 34.4  | 1.5  |
| Eif1a    | eukaryotic translation initiation factor 1A [[MGI:95298]                 | 50.6 | 4.2   | 11.9 |
| Wdr1     | WD repeat domain 1 [[MGI:1337100]                                        | 50.4 | 15.8  | 3.2  |
| Aes      | amino-terminal enhancer of split [[MGI:95806]                            | 50.2 | 92.0  | 0.5  |
| Opa3     | optic atrophy 3 (human)                                                  | 50.1 | 29.8  | 1.7  |
| Cxcl12   | chemokine (C-X-C motif) ligand 12                                        | 50.0 | 37.3  | 1.3  |
| Rpl36    | ribosomal protein L36 [ MGI:1860603]                                     | 50.0 | 19.9  | 2.5  |
| Tubb6    | tubulin, beta 6 class V [ MGI:1915201]                                   | 49.9 | 16.5  | 3.0  |
| Lamp1    | lysosomal-associated membrane protein 1 [ MGI:96745]                     | 49.9 | 19.2  | 2.6  |
| Itga5    | integrin alpha 5 (fibronectin receptor alpha) [ MGI:96604]               | 49.5 | 54.1  | 0.9  |
| Col6a2   | procollagen type VI alpha 2                                              | 49.5 | 83.0  | 0.6  |
| Arpc2    | actin related protein 2/3 complex subunit 2                              | 49.3 | 32.1  | 1.5  |
| Ammecr1  | Alport syndrome, mental retardation, midface hypoplasia and ellipt       | 49.3 | 5.5   | 9.0  |
| Twf1     | twinfilin, actin-binding protein, homolog 1 (Drosophila)                 | 49.0 | 9.5   | 5.2  |
| Lamp2    | lysosomal membrane glycoprotein 2                                        | 48.9 | 6.7   | 7.3  |
| Dhcr24   | 24-dehydrocholesterol reductase                                          | 48.8 | 21.2  | 2.3  |
| Rps17    | ribosomal protein S17                                                    | 48.7 | 17.1  | 2.9  |
| Serpinf1 | serine (or cysteine) proteinase inhibitor, clade F), member 1            | 48.3 | 19.9  | 2.4  |
| Rpl36a   | ribosomal protein L36a                                                   | 48.2 | 2.7   | 17.6 |
| Ppp1cb   | protein phosphatase 1, catalytic subunit, beta isoform                   | 48.1 | 3.9   | 12.2 |
| Rps26    | ribosomal protein S26 (pseudogene)                                       | 48.0 | 10.4  | 4.6  |
| Eif4h    | eukaryotic translation initiation factor 4H [ MGI:1341822]               | 47.8 | 54.3  | 0.9  |
| Pdpn     | podoplanin                                                               | 47.7 | 8.7   | 5.5  |
| Wnt5a    | wingless-related MMTV integration site 5A                                | 47.3 | 9.6   | 5.0  |
| Golph3   | golgi phosphoprotein 3 [ MGI:1913879]                                    | 47.3 | 9.6   | 4.9  |
| Mmp19    | matrix metalloproteinase 19 [ MGI:1927899]                               | 47.3 | 4.6   | 10.3 |
| B2m      | beta-2 microglobulin                                                     | 47.2 | 6.1   | 7.7  |
| AC148089 | novel cadherin domain containing protein                                 | 47.0 | 7.8   | 6.0  |
| Rod1     | ROD1 regulator of differentiation 1 (S. pombe)                           | 47.0 | 6.8   | 6.9  |
| Plekho2  | pleckstrin homology domain containing, family O member 2 [ MGI:46.9      | 46.9 | 61.2  | 0.8  |
| Rap2a    | RAS related protein 2a                                                   | 46.9 | 10.7  | 4.4  |
| Cd248    | CD248 antigen, endosialin [ MGI:1917695]                                 | 46.8 | 101.3 | 0.5  |
| Mapk1ip1 | mitogen-activated protein kinase 1 interacting protein 1-like [ MGI:46.8 | 46.8 | 11.3  | 4.1  |
| Rpl9     | ribosomal protein L9                                                     | 46.2 | 14.6  | 3.2  |

|            |                                                                                                       |      |       |      |
|------------|-------------------------------------------------------------------------------------------------------|------|-------|------|
| Cbfb       | core binding factor beta [ MGI:99851]                                                                 | 46.0 | 7.5   | 6.1  |
| Zfand3     | zinc finger, AN1-type domain 3 [ MGI:1096572]                                                         | 45.8 | 21.2  | 2.2  |
| Rpl3       | ribosomal protein L3 [ MGI:1351605]                                                                   | 45.8 | 26.5  | 1.7  |
| Ppard      | peroxisome proliferator activator receptor delta                                                      | 45.7 | 71.4  | 0.6  |
| AC114420   | novel protein (6330406I15Rik)                                                                         | 45.5 | 9.6   | 4.7  |
| Pafah1b2   | platelet-activating factor acetylhydrolase, isoform 1b, subunit 2 [ MGI:1810013L24]                   | 45.5 | 10.7  | 4.2  |
| 1810013L24 | RIKEN cDNA 1810013L24 gene [ MGI:1916303]                                                             | 45.5 | 7.7   | 5.9  |
| Ptgs2      | prostaglandin-endoperoxide synthase 2 [ MGI:97798]                                                    | 45.5 | 14.2  | 3.2  |
| Sertad4    | SERTA domain containing 4                                                                             | 45.4 | 37.8  | 1.2  |
| Midn       | midnolin                                                                                              | 45.4 | 97.7  | 0.5  |
| Setd5      | SET domain containing 5                                                                               | 45.4 | 10.2  | 4.4  |
| Pphln1     | periphilin 1 [ MGI:1917029]                                                                           | 45.3 | 8.6   | 5.3  |
| P4hb       | prolyl 4-hydroxylase, beta polypeptide                                                                | 45.2 | 17.6  | 2.6  |
| Agpat1     | 1-acylglycerol-3-phosphate O-acyltransferase 1 (lysophosphatidic acid acyltransferase) [ MGI:1859730] | 45.2 | 112.6 | 0.4  |
| Sh3glb1    | SH3-domain GRB2-like B1 (endophilin) [ MGI:1859730]                                                   | 45.0 | 17.4  | 2.6  |
| Eif5a      | eukaryotic translation initiation factor 5A                                                           | 44.9 | 41.8  | 1.1  |
| Hsbp1      | heat shock factor binding protein 1 [ MGI:1915446]                                                    | 44.8 | 15.7  | 2.9  |
| Limal      | LIM domain and actin binding 1                                                                        | 44.6 | 8.6   | 5.2  |
| Rbms3      | RNA binding motif, single stranded interacting protein                                                | 44.6 | 7.1   | 6.3  |
| Slc30a4    | solute carrier family 30 (zinc transporter) member 4                                                  | 44.5 | 4.8   | 9.2  |
| Dctn4      | dynactin 4 [ MGI:1914915]                                                                             | 44.3 | 7.6   | 5.9  |
| R3hdm2     | R3H domain containing 2                                                                               | 43.9 | 58.5  | 0.8  |
| Mob1b      | MOB1, Mps One Binder kinase activator-like 1A (yeast)                                                 | 43.5 | 8.0   | 5.4  |
| Sox4       | SRY (sex determining region Y)-box 4                                                                  | 43.5 | 16.0  | 2.7  |
| Col3a1     | procollagen type III alpha 1                                                                          | 43.4 | 19.1  | 2.3  |
| Gpc4       | glypican 4                                                                                            | 43.3 | 57.3  | 0.8  |
| Tsc22d2    | TSC22 domain family, member 2 [ MGI:1919283]                                                          | 43.3 | 12.6  | 3.4  |
| Gdi2       | guanosine diphosphate (GDP) dissociation inhibitor 2 [ MGI:99845]                                     | 43.1 | 14.8  | 2.9  |
| Rpl27a     | ribosomal protein L27a                                                                                | 43.0 | 7.0   | 6.1  |
| Dpysl2     | dihydropyrimidinase-like 2                                                                            | 42.7 | 34.6  | 1.2  |
| Rpl12      | ribosomal protein L12                                                                                 | 42.6 | 5.8   | 7.4  |
| Gnb211     | guanine nucleotide binding protein (G protein), beta polypeptide 2                                    | 42.6 | 17.4  | 2.4  |
| Arcn1      | archain 1                                                                                             | 42.5 | 24.2  | 1.8  |
| Trp53inp1  | transformation related protein 53 inducible nuclear protein 1                                         | 42.5 | 7.8   | 5.4  |
| Rpl31      | ribosomal protein L31 [ MGI:2149632]                                                                  | 42.4 | 3.8   | 11.2 |
| PDPN       | Podoplanin [Source:UniProtKB/Swiss-Prot;Acc:Q62011]                                                   | 42.4 | 9.2   | 4.6  |
| Ptp4a1     | protein tyrosine phosphatase 4a1                                                                      | 42.3 | 6.1   | 6.9  |
| Eif3a      | eukaryotic translation initiation factor 3, subunit A [ MGI:95301]                                    | 42.3 | 20.9  | 2.0  |
| Pgrmc2     | progesterone receptor membrane component 2                                                            | 42.2 | 14.0  | 3.0  |
| Eif4a1     | eukaryotic translation initiation factor 4A1                                                          | 42.1 | 11.7  | 3.6  |
| Reep3      | receptor accessory protein 3 [ MGI:88930]                                                             | 41.9 | 19.5  | 2.2  |
| Tram1      | translocating chain-associating membrane protein 1 [ MGI:191951]                                      | 41.8 | 6.4   | 6.5  |
| Tmtc3      | transmembrane and tetratricopeptide repeat containing 3                                               | 41.8 | 3.4   | 12.2 |
| Dnajc5     | DnaJ (Hsp40) homolog, subfamily C, member 5                                                           | 41.7 | 10.7  | 3.9  |
| Rrbp1      | ribosome binding protein 1                                                                            | 41.7 | 36.7  | 1.1  |
| Raph1      | Ras association (RalGDS/AF-6) and pleckstrin homology domains                                         | 41.7 | 23.0  | 1.8  |
| Rbpj       | recombination signal binding protein for immunoglobulin kappa J region                                | 41.6 | 19.3  | 2.2  |



|          |                                                                                  |      |      |      |
|----------|----------------------------------------------------------------------------------|------|------|------|
| Psap     | prosaposin                                                                       | 41.5 | 21.5 | 1.9  |
| Rpl8     | ribosomal protein L8 [ MGI:1350927]                                              | 41.4 | 14.3 | 2.9  |
| Cyr61    | cysteine rich protein 61 [ MGI:88613]                                            | 41.3 | 24.0 | 1.7  |
| Vcl      | vinculin [ MGI:98927]                                                            | 41.2 | 45.1 | 0.9  |
| Pea15a   | phosphoprotein enriched in astrocytes 15A                                        | 41.2 | 15.9 | 2.6  |
| Tstd2    | thiosulfate sulfurtransferase (rhodanese)-like domain containing 2               | 41.2 | 5.4  | 7.7  |
| Mmp14    | matrix metalloproteinase 14 (membrane-inserted) [ MGI:101900]                    | 41.1 | 25.3 | 1.6  |
| Ly6e     | lymphocyte antigen 6 complex, locus E [ MGI:106651]                              | 41.0 | 90.6 | 0.5  |
| Gapdh    | glyceraldehyde-3-phosphate dehydrogenase                                         | 41.0 | 28.4 | 1.4  |
| H2afx    | H2A histone family, member X                                                     | 40.9 | 61.8 | 0.7  |
| Capns1   | calpain, small subunit 1                                                         | 40.9 | 92.2 | 0.4  |
| Kras     | v-Ki-ras2 Kirsten rat sarcoma viral oncogene homolog                             | 40.9 | 3.9  | 10.6 |
| Atp5b    | ATP synthase, H <sup>+</sup> transporting mitochondrial F1 complex, beta subunit | 40.8 | 12.3 | 3.3  |
| Cnn2     | calponin 2                                                                       | 40.8 | 12.2 | 3.4  |
| Arhgap5  | Rho GTPase activating protein 5 [ MGI:1332637]                                   | 40.5 | 3.6  | 11.2 |
| Tpp1     | tripeptidyl peptidase I [ MGI:1336194]                                           | 40.4 | 71.8 | 0.6  |
| Glipr2   | GLI pathogenesis-related 2                                                       | 40.2 | 10.4 | 3.9  |
| Slc35a4  | solute carrier family 35, member A4                                              | 40.2 | 79.6 | 0.5  |
| Cox6a1   | cytochrome c oxidase subunit VI a polypeptide 1                                  | 40.1 | 5.6  | 7.2  |
| Pbxip1   | pre-B-cell leukemia transcription factor interacting protein 1                   | 40.0 | 10.9 | 3.7  |
| Pitpnb   | phosphatidylinositol transfer protein, beta [ MGI:1927542]                       | 40.0 | 29.2 | 1.4  |
| Qrich1   | glutamine-rich 1 [ MGI:1916482]                                                  | 39.8 | 7.2  | 5.5  |
| Clip3    | CAP-GLY domain containing linker protein 3                                       | 39.7 | 33.7 | 1.2  |
| Fam120a  | family with sequence similarity 120, member A [ MGI:2446163]                     | 39.5 | 11.7 | 3.4  |
| Fam101b  | family with sequence similarity 101, member B                                    | 39.4 | 11.7 | 3.4  |
| Nudt3    | nudix (nucleotide diphosphate linked moiety X)-type motif                        | 39.2 | 14.0 | 2.8  |
| RP23-92G | novel protein                                                                    | 39.1 | 13.4 | 2.9  |
| Rps25    | ribosomal protein S25 [ MGI:1922867]                                             | 39.1 | 4.7  | 8.4  |
| Thbs2    | thrombospondin 2 [ MGI:98738]                                                    | 39.0 | 13.2 | 3.0  |
| Fkbp9    | FK506 binding protein 9                                                          | 38.9 | 7.2  | 5.4  |
| Arpc1a   | actin related protein 2/3 complex, subunit 1A                                    | 38.9 | 6.7  | 5.8  |
| Axl      | AXL receptor tyrosine kinase                                                     | 38.8 | 45.8 | 0.8  |
| Mcl1     | myeloid cell leukemia sequence 1 [ MGI:101769]                                   | 38.8 | 8.6  | 4.5  |
| Apbb2    | amyloid beta (A4) precursor protein-binding, family B, member 2                  | 38.8 | 6.8  | 5.7  |
| Ube2h    | ubiquitin-conjugating enzyme E2H                                                 | 38.7 | 10.2 | 3.8  |
| Ptp4a2   | protein tyrosine phosphatase 4a2                                                 | 38.7 | 8.4  | 4.6  |
| Prkar2a  | protein kinase, cAMP dependent regulatory, type II alpha [ MGI:101900]           | 38.5 | 9.7  | 4.0  |
| Rpl19    | ribosomal protein L19                                                            | 38.5 | 26.0 | 1.5  |
| Ifitm2   | interferon induced transmembrane protein 2 [ MGI:1933382]                        | 38.3 | 30.8 | 1.2  |
| Runx1t1  | runt-related transcription factor 1; translocated to, 1 (cyclin D-related)       | 38.3 | 13.7 | 2.8  |
| Pank3    | pantothenate kinase 3                                                            | 38.3 | 4.9  | 7.8  |
| Nudt6    | nudix (nucleoside diphosphate linked moiety X)-type motif 6                      | 38.3 | 4.8  | 7.9  |
| Ap2m1    | adaptor protein complex AP-2, mu1                                                | 38.1 | 48.4 | 0.8  |
| Rap1b    | RAS related protein 1b [ MGI:894315]                                             | 38.0 | 3.6  | 10.5 |
| Rpl38    | ribosomal protein L38                                                            | 37.9 | 1.5  | 24.5 |
| Vgll3    | vestigial like 3 (Drosophila) [ MGI:1920819]                                     | 37.8 | 9.5  | 4.0  |
| Lims1    | LIM and senescent cell antigen-like domains 1                                    | 37.7 | 7.6  | 5.0  |

|           |                                                                     |      |       |      |
|-----------|---------------------------------------------------------------------|------|-------|------|
| Pttglip   | pituitary tumor-transforming 1 interacting protein                  | 37.6 | 12.5  | 3.0  |
| Tmem47    | transmembrane protein 47                                            | 37.6 | 4.5   | 8.3  |
| Cpne3     | copine III                                                          | 37.4 | 5.7   | 6.6  |
| Zbtb34    | zinc finger and BTB domain containing 34                            | 37.3 | 5.2   | 7.2  |
| Cdc27     | cell division cycle 27 homolog ( <i>S. cerevisiae</i> )             | 37.2 | 3.4   | 11.1 |
| Dusp7     | dual specificity phosphatase 7                                      | 37.2 | 32.9  | 1.1  |
| Rpl26     | ribosomal protein L26                                               | 37.1 | 6.2   | 6.0  |
| Pdap1     | PDGFA associated protein 1                                          | 37.1 | 0.5   | 71.1 |
| Ghitm     | growth hormone inducible transmembrane protein [ MGI:1913342]       | 37.1 | 4.8   | 7.7  |
| Efnb2     | ephrin B2                                                           | 37.1 | 10.8  | 3.4  |
| Hspg2     | perlecan (heparan sulfate proteoglycan 2)                           | 36.7 | 61.9  | 0.6  |
| Zdhhc20   | zinc finger, DHHC domain containing 20 [ MGI:1923215]               | 36.6 | 3.6   | 10.1 |
| Zyx       | zyxin [ MGI:103072]                                                 | 36.6 | 140.5 | 0.3  |
| Ppia      | peptidylprolyl isomerase A                                          | 36.6 | 21.2  | 1.7  |
| Rc3h2     | ring finger and CCCH-type zinc finger domains 2                     | 36.6 | 6.0   | 6.1  |
| Pdgfa     | platelet derived growth factor, alpha                               | 36.6 | 4.4   | 8.3  |
| Rac1      | RAS-related C3 botulinum substrate 1                                | 36.5 | 18.1  | 2.0  |
| Rlim      | ring finger protein, LIM domain interacting                         | 36.5 | 5.1   | 7.2  |
| Tspan3    | tetraspanin 3 [ MGI:1928098]                                        | 36.3 | 4.9   | 7.4  |
| Twsg1     | twisted gastrulation homolog 1 ( <i>Drosophila</i> ) [ MGI:2137520] | 35.9 | 7.4   | 4.8  |
| Spred2    | sprouty protein with EVH-1 domain 2, related sequence               | 35.8 | 26.3  | 1.4  |
| Hnrnpu    | heterogeneous nuclear ribonucleoprotein U                           | 35.8 | 7.3   | 4.9  |
| Pdzd8     | PDZ domain containing 8 [ MGI:2677270]                              | 35.8 | 4.1   | 8.6  |
| Arl8a     | ADP-ribosylation factor-like 8A                                     | 35.7 | 105.3 | 0.3  |
| Polr2m    | glutamate receptor, ionotropic, N-methyl D-aspartate-like 1A        | 35.6 | 9.3   | 3.8  |
| Rpl10a    | ribosomal protein L10A                                              | 35.6 | 18.8  | 1.9  |
| Atf1      | activating transcription factor 1                                   | 35.5 | 4.5   | 7.9  |
| Rps3      | ribosomal protein S3                                                | 35.3 | 20.0  | 1.8  |
| Cd164     | CD164 antigen [ MGI:1859568]                                        | 35.2 | 7.8   | 4.5  |
| RP23-22P2 | novel protein (C78339)                                              | 35.1 | 2.5   | 13.8 |
| Bace1     | beta-site APP cleaving enzyme 1                                     | 35.1 | 8.2   | 4.3  |
| Rps8      | ribosomal protein S8                                                | 34.8 | 7.0   | 5.0  |
| Rab5b     | RAB5B, member RAS oncogene family [ MGI:105938]                     | 34.8 | 62.2  | 0.6  |
| Adam19    | a disintegrin and metalloproteinase domain 19 (meltrin beta)        | 34.8 | 69.3  | 0.5  |
| Atf5      | activating transcription factor 5                                   | 34.8 | 44.0  | 0.8  |
| Spnb2     | spectrin beta 2                                                     | 34.8 | 12.9  | 2.7  |
| Atl3      | atlastin GTPase 3 [ MGI:1924270]                                    | 34.7 | 6.4   | 5.4  |
| Spin1     | spindlin 1 [ MGI:109242]                                            | 34.5 | 9.6   | 3.6  |
| Papola    | poly (A) polymerase alpha                                           | 34.5 | 9.6   | 3.6  |
| Wrb       | tryptophan rich basic protein                                       | 34.4 | 3.5   | 9.9  |
| Cryab     | crystallin, alpha B [ MGI:88516]                                    | 34.2 | 27.5  | 1.2  |
| Setd8     | SET domain containing (lysine methyltransferase) 8                  | 34.2 | 7.5   | 4.5  |
| Amotl1    | angiomin-like 1                                                     | 34.2 | 12.3  | 2.8  |
| Ptms      | parathyrosin                                                        | 34.2 | 541.5 | 0.1  |
| Elov16    | ELOVL family member 6, elongation of long chain fatty acids (yea)   | 34.0 | 6.4   | 5.3  |
| Gna12     | guanine nucleotide binding protein, alpha 12                        | 34.0 | 16.3  | 2.1  |
| Rnf150    | ring finger protein 150 [ MGI:2443860]                              | 33.9 | 11.5  | 2.9  |

|          |                                                                  |      |      |      |
|----------|------------------------------------------------------------------|------|------|------|
| Ralb     | v-ral simian leukemia viral oncogene homolog B                   | 33.8 | 8.3  | 4.1  |
| Ube2l3   | ubiquitin-conjugating enzyme E2L 3                               | 33.6 | 6.3  | 5.3  |
| Pten     | phosphatase and tensin homolog                                   | 33.6 | 5.7  | 5.9  |
| Eif4b    | eukaryotic translation initiation factor 4B [ MGI:95304]         | 33.5 | 14.5 | 2.3  |
| Atp6ap1  | ATPase, H <sup>+</sup> transporting, lysosomal accessory protein | 33.5 | 6.3  | 5.3  |
| Gna11    | guanine nucleotide binding protein, alpha 11                     | 33.4 | 30.3 | 1.1  |
| Rab31    | RAB31, member RAS oncogene family [ MGI:1914603]                 | 33.4 | 10.1 | 3.3  |
| Mfap4    | microfibrillar-associated protein 4                              | 33.4 | 67.8 | 0.5  |
| Adm      | adrenomedullin [ MGI:108058]                                     | 33.3 | 2.8  | 11.8 |
| Psme3    | proteasome (prosome, macropain) 28 subunit, 3                    | 33.3 | 37.4 | 0.9  |
| Figf     | c-fos induced growth factor                                      | 33.3 | 19.6 | 1.7  |
| Prss23   | protease, serine, 23 [ MGI:1923703]                              | 33.2 | 7.9  | 4.2  |
| Mib1     | mindbomb homolog 1 (Drosophila)                                  | 33.2 | 3.8  | 8.7  |
| Ddit3    | DNA-damage inducible transcript 3                                | 33.1 | 4.5  | 7.4  |
| Col12a1  | procollagen type XII alpha 1                                     | 33.0 | 23.2 | 1.4  |
| Edf1     | endothelial differentiation-related factor 1                     | 33.0 | 11.7 | 2.8  |
| Surf4    | surfeit gene 4                                                   | 32.8 | 20.8 | 1.6  |
| Hnrnpk   | heterogeneous nuclear ribonucleoprotein K                        | 32.8 | 5.7  | 5.7  |
| Dap      | death-associated protein [ MGI:1918190]                          | 32.8 | 21.0 | 1.6  |
| Rps5     | ribosomal protein S5                                             | 32.7 | 11.3 | 2.9  |
| Tecr     | trans-2,3-enoyl-CoA reductase [ MGI:1915408]                     | 32.7 | 45.3 | 0.7  |
| Nrp2     | neuropilin 2                                                     | 32.7 | 12.3 | 2.7  |
| Nme2     | expressed in non-metastatic cells 2 protein                      | 32.6 | 5.3  | 6.1  |
| Wbscr17  | Williams-Beuren syndrome chromosome region 17 homolog (human)    | 32.6 | 20.7 | 1.6  |
| Cst3     | cystatin C                                                       | 32.6 | 2.2  | 14.9 |
| Mtdh     | metadherin                                                       | 32.6 | 5.9  | 5.5  |
| Mapk6    | mitogen-activated protein kinase 6                               | 32.5 | 9.8  | 3.3  |
| Tuba1c   | tubulin, alpha 1C [ MGI:1095409]                                 | 32.5 | 13.0 | 2.5  |
| Zfp36    | zinc finger protein 36                                           | 32.5 | 30.9 | 1.1  |
| Klhl9    | kelch-like 9 (Drosophila)                                        | 32.5 | 3.9  | 8.3  |
| Nfat5    | nuclear factor of activated T-cells 5                            | 32.4 | 16.1 | 2.0  |
| Atxn2l   | ataxin 2-like                                                    | 32.4 | 73.1 | 0.4  |
| Eef1g    | eukaryotic translation elongation factor 1 gamma                 | 32.2 | 18.6 | 1.7  |
| Hnrnpul1 | heterogeneous nuclear ribonucleoprotein U-like 1 [ MGI:2443517]  | 32.1 | 22.5 | 1.4  |
| Flna     | filamin, alpha                                                   | 32.1 | 35.0 | 0.9  |
| Tagln    | transgelin [ MGI:106012]                                         | 32.1 | 38.7 | 0.8  |
| Igfbp5   | insulin-like growth factor binding protein 5                     | 32.0 | 37.6 | 0.9  |
| Fosl2    | fos-like antigen 2 [ MGI:102858]                                 | 32.0 | 32.5 | 1.0  |
| Fkbp10   | FK506 binding protein 10                                         | 31.9 | 42.1 | 0.8  |
| Rpl37a   | ribosomal protein L37a [ MGI:98068]                              | 31.9 | 9.1  | 3.5  |
| Uprt     | uracil phosphoribosyltransferase (FUR1) homolog (S. cerevisiae)  | 31.8 | 3.5  | 9.0  |
| Hn11     | hematological and neurological expressed 1-like [ MGI:1196260]   | 31.8 | 8.5  | 3.7  |
| Ahnak    | AHNAK nucleoprotein (desmoyokin) [ MGI:1316648]                  | 31.8 | 10.8 | 2.9  |
| Tmsb10   | thymosin, beta 10                                                | 31.7 | 17.2 | 1.8  |
| Pmepal   | prostate transmembrane protein, androgen induced 1               | 31.6 | 28.5 | 1.1  |
| Csrp1    | cysteine and glycine-rich protein 1                              | 31.4 | 70.2 | 0.4  |
| Spry2    | sprouty homolog 2 (Drosophila) [ MGI:1345138]                    | 31.4 | 10.6 | 2.9  |

|           |                                                                      |      |       |     |
|-----------|----------------------------------------------------------------------|------|-------|-----|
| Kctd17    | potassium channel tetramerisation domain containing 17               | 31.3 | 133.7 | 0.2 |
| Rpl13     | ribosomal protein L13                                                | 31.3 | 5.2   | 6.1 |
| Akap2     | A kinase (PRKA) anchor protein 2                                     | 31.1 | 4.2   | 7.4 |
| Lhfp      | lipoma HMGIC fusion partner                                          | 30.7 | 3.9   | 7.8 |
| 2310022B  | (RIKEN cDNA 2310022B05 gene [ MGI:1916801]                           | 30.7 | 119.8 | 0.3 |
| Rere      | arginine glutamic acid dipeptide (RE) repeats                        | 30.7 | 46.6  | 0.7 |
| Ehd2      | EH-domain containing 2                                               | 30.7 | 45.9  | 0.7 |
| Kdelr1    | KDEL (Lys-Asp-Glu-Leu) endoplasmic reticulum protein retention       | 30.6 | 16.5  | 1.9 |
| Tgoln1    | trans-golgi network protein                                          | 30.6 | 9.7   | 3.2 |
| Rcc2      | regulator of chromosome condensation 2                               | 30.5 | 14.9  | 2.0 |
| Gpc6      | glypican 6                                                           | 30.5 | 39.3  | 0.8 |
| Lasp1     | LIM and SH3 protein 1                                                | 30.4 | 59.6  | 0.5 |
| Vezf1     | vascular endothelial zinc finger 1                                   | 30.4 | 5.8   | 5.2 |
| Gxylt2    | glycosyltransferase 8 domain containing 4                            | 30.4 | 7.7   | 3.9 |
| Map2k4    | mitogen activated protein kinase kinase 4, variant 1                 | 30.3 | 7.0   | 4.3 |
| Caprin1   | cell cycle associated protein 1                                      | 30.3 | 5.8   | 5.2 |
| Rpl14     | ribosomal protein L14 [ MGI:1914365]                                 | 30.3 | 23.1  | 1.3 |
| Ewsr1     | Ewing sarcoma breakpoint region 1                                    | 30.3 | 9.6   | 3.2 |
| Clic4     | chloride intracellular channel 4 (mitochondrial)                     | 30.2 | 18.9  | 1.6 |
| Elk4      | ELK4, member of ETS oncogene family                                  | 30.2 | 18.2  | 1.7 |
| Poldip3   | polymerase (DNA-directed), delta interacting protein 3               | 30.2 | 10.6  | 2.9 |
| Gtlf3b    | gene trap locus F3b                                                  | 30.1 | 42.0  | 0.7 |
| Eif5      | eukaryotic translation initiation factor 5 [ MGI:95309]              | 30.1 | 5.4   | 5.5 |
| Gm21811   | predicted gene, 21811 [ MGI:5433975]                                 | 30.0 | 4.1   | 7.3 |
| RP23-124I | novel protein (B230312A22Rik)                                        | 30.0 | 28.0  | 1.1 |
| Ptbp1     | polypyrimidine tract binding protein 1                               | 30.0 | 23.0  | 1.3 |
| Fam195b   | family with sequence similarity 195, member B                        | 29.9 | 15.9  | 1.9 |
| Sgta      | small glutamine-rich tetratricopeptide repeat (TPR)-containing, alp  | 29.8 | 21.5  | 1.4 |
| Hyou1     | hypoxia up-regulated 1                                               | 29.8 | 35.3  | 0.8 |
| Litaf     | LPS-induced TN factor                                                | 29.8 | 11.9  | 2.5 |
| Brd4      | bromodomain containing 4                                             | 29.8 | 24.9  | 1.2 |
| Acat2     | acetyl-Coenzyme A acetyltransferase 2                                | 29.7 | 3.1   | 9.6 |
| Acly      | ATP citrate lyase                                                    | 29.6 | 4.7   | 6.3 |
| My16      | myosin, light polypeptide 6, alkali, smooth muscle and non-muscle    | 29.6 | 13.8  | 2.1 |
| Hdlbp     | high density lipoprotein (HDL) binding protein [ MGI:99256]          | 29.5 | 23.2  | 1.3 |
| Tcea1     | transcription elongation factor A (SII) 1                            | 29.4 | 3.5   | 8.3 |
| Rhoa      | ras homolog gene family, member A [ MGI:1096342]                     | 29.4 | 12.2  | 2.4 |
| Pappa     | pregnancy-associated plasma protein A                                | 29.4 | 8.6   | 3.4 |
| Pdia4     | protein disulfide isomerase associated 4 [ MGI:104864]               | 29.3 | 6.9   | 4.3 |
| Qk        | quaking [ MGI:97837]                                                 | 29.3 | 4.8   | 6.1 |
| Efemp1    | epidermal growth factor-containing fibulin-like extracellular matrix | 29.2 | 5.0   | 5.8 |
| Rps2      | ribosomal protein S2                                                 | 29.2 | 9.8   | 3.0 |
| Mob3a     | MOB kinase activator 3A [ MGI:3050117]                               | 29.1 | 7.2   | 4.1 |
| Cited2    | Cbp/p300-interacting transactivator, with Glu/Asp-rich carboxy-ter   | 29.1 | 13.2  | 2.2 |
| Syngap1   | synaptic Ras GTPase activating protein 1 homolog (rat) [ MGI:303     | 29.1 | 29.0  | 1.0 |
| Ccl2      | chemokine (C-C motif) ligand 2                                       | 29.0 | 5.1   | 5.7 |
| Tceb2     | transcription elongation factor B (SIII), polypeptide 2 [ MGI:19149  | 29.0 | 4.0   | 7.3 |

|         |                                                                       |      |       |      |
|---------|-----------------------------------------------------------------------|------|-------|------|
| Tgfb1i1 | transforming growth factor beta 1 induced transcript 1                | 29.0 | 99.2  | 0.3  |
| Atf4    | activating transcription factor 4 [ MGI:88096]                        | 28.9 | 10.5  | 2.8  |
| Mapre1  | microtubule-associated protein, RP/EB family, member 1                | 28.9 | 13.2  | 2.2  |
| Gatad2b | GATA zinc finger domain containing 2B [ MGI:2443225]                  | 28.9 | 25.6  | 1.1  |
| Naa50   | N-acetyltransferase 13                                                | 28.7 | 4.3   | 6.7  |
| Wsb2    | WD repeat and SOCS box-containing 2                                   | 28.7 | 12.1  | 2.4  |
| Elov15  | ELOVL family member 5, elongation of long chain fatty acids (yea      | 28.6 | 4.3   | 6.7  |
| Tfdp1   | transcription factor Dp 1 [ MGI:101934]                               | 28.6 | 19.5  | 1.5  |
| Kif5b   | kinesin family member 5B                                              | 28.6 | 3.9   | 7.4  |
| Cox7a2l | cytochrome c oxidase subunit VIIa polypeptide 2-like [ MGI:1060128.5  | 28.5 | 7.0   | 4.1  |
| Dcakd   | dephospho-CoA kinase domain containing                                | 28.5 | 33.9  | 0.8  |
| Mt2     | metallothionein 2 [ MGI:97172]                                        | 28.4 | 1.5   | 18.9 |
| Pkm     | pyruvate kinase, muscle [ MGI:97591]                                  | 28.4 | 50.7  | 0.6  |
| Rpl37   | ribosomal protein L37 [ MGI:1914531]                                  | 28.3 | 2.1   | 13.3 |
| Aebp1   | AE binding protein 1                                                  | 28.2 | 45.5  | 0.6  |
| Rpl30   | ribosomal protein L30                                                 | 28.2 | 2.7   | 10.4 |
| Gsk3a   | glycogen synthase kinase 3 alpha                                      | 28.2 | 59.0  | 0.5  |
| Tmx3    | thioredoxin-related transmembrane protein 3 [ MGI:2442418]            | 28.1 | 1.5   | 18.6 |
| Fndc3b  | fibronectin type III domain containing 3B [ MGI:1919257]              | 28.1 | 10.7  | 2.6  |
| Grina   | glutamate receptor, ionotropic, N-methyl D-aspartate-associated pr    | 28.0 | 38.5  | 0.7  |
| Dazap2  | DAZ associated protein 2 [ MGI:1344344]                               | 27.9 | 29.0  | 1.0  |
| Tbx15   | T-box 15                                                              | 27.9 | 3.4   | 8.3  |
| Col4a1  | procollagen type IV alpha 1                                           | 27.8 | 25.6  | 1.1  |
| Arpc1b  | actin related protein 2/3 complex, subunit 1B                         | 27.7 | 12.6  | 2.2  |
| Picalm  | phosphatidylinositol binding clathrin assembly protein [ MGI:238527.7 | 27.7 | 4.8   | 5.8  |
| Wasf2   | WAS protein family, member 2                                          | 27.6 | 38.6  | 0.7  |
| Myo1d   | myosin ID                                                             | 27.6 | 10.7  | 2.6  |
| Clic1   | chloride intracellular channel 1                                      | 27.6 | 3.6   | 7.6  |
| S1pr3   | sphingosine-1-phosphate receptor 3 [ MGI:1339365]                     | 27.5 | 12.7  | 2.2  |
| Atxn7l3 | ataxin 7-like 3                                                       | 27.5 | 14.6  | 1.9  |
| Gng10   | guanine nucleotide binding protein (G protein) gamma 10               | 27.5 | 2.0   | 13.6 |
| Ypel5   | yippee-like 5 (Drosophila) [ MGI:1916937]                             | 27.5 | 4.7   | 5.8  |
| Tob1    | transducer of ErbB-2.1                                                | 27.5 | 7.4   | 3.7  |
| Pcdh7   | protocadherin 7 [ MGI:1860487]                                        | 27.3 | 6.9   | 3.9  |
| Rpl7a   | ribosomal protein L7a                                                 | 27.3 | 11.6  | 2.4  |
| Cmip    | c-Maf inducing protein [ MGI:1921690]                                 | 27.3 | 28.6  | 1.0  |
| Gm10800 | predicted gene 10800 [ MGI:3641657]                                   | 27.2 | 509.9 | 0.1  |
| St3gal1 | ST3 beta-galactoside alpha-2,3-sialyltransferase 1 [ MGI:98304]       | 27.2 | 32.4  | 0.8  |
| Preli1  | PRELI domain containing 1 [ MGI:1913744]                              | 27.2 | 15.5  | 1.8  |
| Gsr     | glutathione reductase 1                                               | 27.1 | 3.1   | 8.7  |
| Capza1  | capping protein (actin filament) muscle Z-line, alpha 1               | 27.1 | 5.3   | 5.1  |
| Gtf2a1  | general transcription factor II A, 1                                  | 27.1 | 3.1   | 8.6  |
| Acsl4   | acyl-CoA synthetase long-chain family member 4                        | 27.1 | 2.0   | 13.7 |
| Psm7    | proteasome (prosome, macropain) subunit, alpha type 7                 | 27.0 | 3.8   | 7.1  |
| Kdm6b   | KDM1 lysine (K)-specific demethylase 6B                               | 27.0 | 36.3  | 0.7  |
| Pcgf2   | polycomb group ring finger 2                                          | 26.9 | 50.5  | 0.5  |
| Tcf20   | transcription factor 20 [ MGI:108399]                                 | 26.9 | 14.5  | 1.9  |

|           |                                                                           |      |       |      |
|-----------|---------------------------------------------------------------------------|------|-------|------|
| Ttyh2     | tweety homolog 2                                                          | 26.9 | 17.3  | 1.6  |
| Gatad1    | GATA zinc finger domain containing 1                                      | 26.9 | 2.8   | 9.4  |
| Ctxn1     | cortexin 1 [ MGI:88566]                                                   | 26.8 | 113.6 | 0.2  |
| Lpar1     | lysophosphatidic acid receptor 1                                          | 26.7 | 2.6   | 10.3 |
| Bag1      | Bcl2-associated athanogene 1                                              | 26.7 | 16.1  | 1.7  |
| Cdk4      | cyclin-dependent kinase 4                                                 | 26.5 | 10.5  | 2.5  |
| Ywhah     | tyrosine 3-monooxygenase/tryptophan 5-monooxygenase activator             | 26.4 | 8.2   | 3.2  |
| Carm1     | coactivator-associated arginine methyltransferase 1                       | 26.4 | 41.5  | 0.6  |
| Fmr1      | fragile X mental retardation syndrome 1 homolog                           | 26.4 | 2.2   | 12.0 |
| Mfap1a    | microfibrillar-associated protein 1A                                      | 26.3 | 2.3   | 11.6 |
| Chmp4b    | chromatin modifying protein 4B                                            | 26.3 | 9.6   | 2.7  |
| Ubp2      | ubiquitin-associated protein 2                                            | 26.3 | 28.5  | 0.9  |
| Hs2st1    | heparan sulfate 2-O-sulfotransferase 1                                    | 26.3 | 7.1   | 3.7  |
| Rps20     | ribosomal protein S20                                                     | 26.3 | 3.7   | 7.1  |
| Ldlr      | low density lipoprotein receptor [ MGI:96765]                             | 26.2 | 8.2   | 3.2  |
| Cox8a     | cytochrome c oxidase subunit VIIIa [ MGI:105959]                          | 26.2 | 3.3   | 8.0  |
| Spop      | speckle-type POZ protein                                                  | 26.2 | 13.3  | 2.0  |
| Dvl3      | dishevelled 3, dsh homolog (Drosophila)                                   | 26.2 | 65.6  | 0.4  |
| Cdc42     | cell division cycle 42 homolog (S. cerevisiae)                            | 26.2 | 6.4   | 4.1  |
| Mfsd1     | major facilitator superfamily domain containing 1 [ MGI:1914118]          | 26.1 | 2.7   | 9.5  |
| Csnk1a1   | casein kinase 1, alpha 1                                                  | 26.0 | 6.5   | 4.0  |
| Papd4     | PAP associated domain containing 4 [ MGI:2140950]                         | 25.8 | 8.5   | 3.0  |
| Mest      | mesoderm specific transcript                                              | 25.8 | 6.6   | 3.9  |
| Plp2      | proteolipid protein 2                                                     | 25.7 | 20.4  | 1.3  |
| Sp3       | trans-acting transcription factor 3                                       | 25.7 | 4.3   | 6.0  |
| Itpr12    | inositol 1,4,5-triphosphate receptor interacting protein-like 2 [ MGI:256 | 25.6 | 6.5   | 3.9  |
| Fdft1     | farnesyl diphosphate farnesyl transferase 1 [ MGI:102706]                 | 25.6 | 3.0   | 8.5  |
| Wipf2     | WAS/WASL interacting protein family, member 2                             | 25.6 | 7.9   | 3.2  |
| Rps19     | ribosomal protein S19                                                     | 25.6 | 6.1   | 4.2  |
| Afap1     | actin filament associated protein 1                                       | 25.5 | 14.8  | 1.7  |
| Cdkn2b    | cyclin-dependent kinase inhibitor 2B (p15, inhibits CDK4) [ MGI:125.5     | 25.5 | 21.7  | 1.2  |
| Zfp266    | zinc finger protein 266                                                   | 25.4 | 4.9   | 5.2  |
| Tnpo1     | transportin 1                                                             | 25.4 | 3.8   | 6.7  |
| Foxn3     | forkhead box N3                                                           | 25.4 | 8.0   | 3.2  |
| Ubf1      | ubiquitin family domain containing 1                                      | 25.4 | 7.9   | 3.2  |
| Ston1     | stonin 1                                                                  | 25.4 | 14.1  | 1.8  |
| Prkci     | protein kinase C, iota                                                    | 25.3 | 4.3   | 5.9  |
| Esyt2     | extended synaptotagmin-like protein 2 [ MGI:1261845]                      | 25.3 | 5.2   | 4.9  |
| Spred1    | sprouty protein with EVH-1 domain 1, related sequence                     | 25.2 | 4.6   | 5.5  |
| Git1      | G protein-coupled receptor kinase-interactor 1                            | 25.2 | 46.1  | 0.5  |
| Tmed5     | transmembrane emp24 protein transport domain containing 5                 | 25.1 | 1.7   | 14.6 |
| Plxna1    | plexin A1 [ MGI:107685]                                                   | 25.1 | 35.6  | 0.7  |
| Tnfaip1   | tumor necrosis factor, alpha-induced protein 1 (endothelial)              | 25.1 | 10.7  | 2.3  |
| Sike1     | suppressor of IKBKE 1                                                     | 25.1 | 4.9   | 5.1  |
| Bak1      | BCL2-antagonist/killer 1                                                  | 25.1 | 43.4  | 0.6  |
| Tnfrsf10b | tumor necrosis factor receptor superfamily, member 10b [ MGI:132          | 25.0 | 8.2   | 3.1  |
| Lin7c     | lin-7 homolog C (C. elegans)                                              | 25.0 | 3.9   | 6.3  |

|           |                                                                        |      |      |      |
|-----------|------------------------------------------------------------------------|------|------|------|
| Zbed3     | zinc finger, BED domain containing 3 [ MGI:1919364]                    | 25.0 | 35.7 | 0.7  |
| Stat3     | signal transducer and activator of transcription 3                     | 24.9 | 10.8 | 2.3  |
| Hif1a     | hypoxia inducible factor 1, alpha subunit                              | 24.9 | 3.6  | 6.9  |
| Rhoq      | ras homolog gene family, member Q                                      | 24.9 | 4.7  | 5.3  |
| Col5a2    | procollagen, type V, alpha 2                                           | 24.8 | 27.0 | 0.9  |
| RP23-279J | novel protein                                                          | 24.8 | 1.2  | 20.4 |
| Rock2     | Rho-associated coiled-coil containing protein kinase 2 [ MGI:1079:24.8 | 24.8 | 4.6  | 5.4  |
| Gabarap1  | gamma-aminobutyric acid (GABA) A receptor-associated protein-1         | 24.8 | 6.9  | 3.6  |
| Igf2bp2   | insulin-like growth factor 2 mRNA binding protein 2                    | 24.7 | 22.8 | 1.1  |
| Tmem184f  | transmembrane protein 184b [ MGI:2445179]                              | 24.7 | 65.8 | 0.4  |
| Pcolce    | procollagen C-endopeptidase enhancer protein                           | 24.7 | 35.9 | 0.7  |
| Mef2a     | myocyte enhancer factor 2A                                             | 24.7 | 5.2  | 4.7  |
| Ghr       | growth hormone receptor                                                | 24.6 | 5.1  | 4.8  |
| Sdc3      | syndecan 3                                                             | 24.6 | 42.0 | 0.6  |
| Sec61a1   | Sec61 alpha 1 subunit (S. cerevisiae)                                  | 24.6 | 11.9 | 2.1  |
| Zfhx3     | zinc finger homeobox 3                                                 | 24.4 | 17.7 | 1.4  |
| Glg1      | golgi apparatus protein 1                                              | 24.4 | 11.2 | 2.2  |
| Pcnp      | PEST proteolytic signal containing nuclear protein                     | 24.3 | 3.2  | 7.7  |
| Erlec1    | endoplasmic reticulum lectin 1                                         | 24.2 | 19.7 | 1.2  |
| Gmfb      | glia maturation factor, beta                                           | 24.2 | 3.7  | 6.6  |
| Ereg      | epiregulin [ MGI:107508]                                               | 24.2 | 1.5  | 16.6 |
| Zmiz1     | zinc finger, MIZ-type containing 1                                     | 23.9 | 61.9 | 0.4  |
| Nrp1      | neuropilin 1 [ MGI:106206]                                             | 23.8 | 6.4  | 3.7  |
| RP23-160C | ortholog of chromosome 20 open reading frame 108 C20orf108 (Hs)        | 23.8 | 4.8  | 5.0  |
| Otub1     | OTU domain, ubiquitin aldehyde binding 1                               | 23.8 | 26.6 | 0.9  |
| Mxra8     | matrix-remodelling associated 8                                        | 23.8 | 8.5  | 2.8  |
| Rcn1      | reticulocalbin 1                                                       | 23.7 | 6.3  | 3.8  |
| Rcn3      | reticulocalbin 3, EF-hand calcium binding domain                       | 23.7 | 9.6  | 2.5  |
| Tmem30a   | transmembrane protein 30A                                              | 23.7 | 3.1  | 7.8  |
| Crk       | v-crk sarcoma virus CT10 oncogene homolog (avian)                      | 23.6 | 6.7  | 3.5  |
| Hmgb1     | high mobility group box 1                                              | 23.6 | 1.3  | 18.7 |
| Dynlt3    | dynein light chain Tctex-type 3                                        | 23.5 | 2.8  | 8.3  |
| Rnf44     | ring finger protein 44                                                 | 23.5 | 95.3 | 0.2  |
| Cyp20a1   | cytochrome P450 family 20 subfamily A polypeptide 1                    | 23.4 | 3.2  | 7.4  |
| Podn      | podocan                                                                | 23.3 | 3.7  | 6.3  |
| Csf1      | colony stimulating factor 1 (macrophage)                               | 23.3 | 13.0 | 1.8  |
| Prkaca    | protein kinase, cAMP dependent, catalytic, alpha [ MGI:97592]          | 23.3 | 28.1 | 0.8  |
| Ddah1     | dimethylarginine dimethylaminohydrolase 1                              | 23.3 | 30.7 | 0.8  |
| Anxa1     | annexin A1                                                             | 23.3 | 4.3  | 5.4  |
| Eif4ebp2  | eukaryotic translation initiation factor 4E binding protein 2 [ MGI:   | 23.2 | 95.8 | 0.2  |
| Kpna4     | karyopherin (importin) alpha 4                                         | 23.2 | 4.6  | 5.0  |
| Taok1     | TAO kinase 1                                                           | 23.2 | 3.6  | 6.3  |
| Nfya      | nuclear transcription factor-Y alpha                                   | 23.1 | 6.1  | 3.8  |
| Csnk2a1   | casein kinase 2, alpha 1 polypeptide                                   | 23.0 | 4.2  | 5.4  |
| Rps6      | ribosomal protein S6                                                   | 23.0 | 28.1 | 0.8  |
| Rnf187    | ring finger protein 187                                                | 23.0 | 15.1 | 1.5  |
| Nfe2l1    | nuclear factor, erythroid derived 2,-like 1                            | 23.0 | 11.7 | 2.0  |

|          |                                                                                |      |      |      |
|----------|--------------------------------------------------------------------------------|------|------|------|
| Atp5g3   | ATP synthase, H <sup>+</sup> transporting, mitochondrial F0 complex, subunit 2 | 22.9 | 1.5  | 14.8 |
| Stom     | stomatin                                                                       | 22.8 | 7.8  | 2.9  |
| Capn2    | calpain 2 [ MGI:88264]                                                         | 22.8 | 8.4  | 2.7  |
| Srsf5    | splicing factor, arginine/serine-rich 5 (SRp40, HRS)                           | 22.8 | 7.5  | 3.0  |
| Kif1a    | kinesin family member 1A [ MGI:108391]                                         | 22.7 | 5.9  | 3.9  |
| Ubc      | ubiquitin C                                                                    | 22.7 | 10.4 | 2.2  |
| Cltc     | clathrin, heavy polypeptide (Hc)                                               | 22.7 | 5.7  | 4.0  |
| Hipk3    | homeodomain interacting protein kinase 3                                       | 22.6 | 7.5  | 3.0  |
| Klf7     | Kruppel-like factor 7 (ubiquitous)                                             | 22.6 | 10.9 | 2.1  |
| Sec22b   | SEC22 vesicle trafficking protein homolog B ( <i>S. cerevisiae</i> )           | 22.6 | 9.2  | 2.4  |
| Serp1    | stress-associated endoplasmic reticulum protein 1                              | 22.5 | 6.8  | 3.3  |
| Dlgap4   | discs, large homolog-associated protein 4 ( <i>Drosophila</i> )                | 22.5 | 38.7 | 0.6  |
| Csnk1d   | casein kinase 1, delta                                                         | 22.5 | 7.4  | 3.0  |
| St13     | suppression of tumorigenicity 13                                               | 22.5 | 4.9  | 4.6  |
| Pi15     | peptidase inhibitor 15 [ MGI:1934659]                                          | 22.5 | 1.3  | 17.5 |
| Runx2    | runt related transcription factor 2                                            | 22.5 | 28.2 | 0.8  |
| Snx18    | sorting nexin 18 [ MGI:2137642]                                                | 22.4 | 3.6  | 6.2  |
| Ccdc50   | coiled-coil domain containing 50                                               | 22.4 | 1.9  | 11.5 |
| Tbc1d20  | TBC1 domain family, member 20                                                  | 22.3 | 18.7 | 1.2  |
| Rpl23a   | ribosomal protein L23a                                                         | 22.3 | 4.5  | 5.0  |
| Lass6    | longevity assurance homolog 6 ( <i>S. cerevisiae</i> )                         | 22.3 | 6.7  | 3.3  |
| AC162528 | novel protein (2900026A02Rik)                                                  | 22.3 | 15.6 | 1.4  |
| C1qtnf3  | C1q and tumor necrosis factor related protein 3                                | 22.3 | 3.7  | 6.0  |
| R3hdm4   | R3H domain containing 4 [ MGI:1924814]                                         | 22.3 | 85.2 | 0.3  |
| Htr1b    | 5-hydroxytryptamine (serotonin) receptor 1B [ MGI:96274]                       | 22.3 | 9.8  | 2.3  |
| Slc6a6   | solute carrier family 6 (neurotransmitter transporter, taurine), member 6      | 22.2 | 11.5 | 1.9  |
| Usp22    | ubiquitin specific protease 22                                                 | 22.2 | 8.6  | 2.6  |
| Prelp    | proline arginine-rich end leucine-rich repeat                                  | 22.1 | 12.5 | 1.8  |
| Sirpa    | signal-regulatory protein alpha                                                | 22.1 | 4.5  | 4.9  |
| Pomp     | proteasome maturation protein [ MGI:1913787]                                   | 22.0 | 3.2  | 6.9  |
| Hoxb9    | homeobox B9                                                                    | 22.0 | 15.4 | 1.4  |
| Ncstn    | nicastrin                                                                      | 22.0 | 44.7 | 0.5  |
| Rbfox2   | RNA binding protein, fox-1 homolog ( <i>C. elegans</i> ) 2 [ MGI:193397]       | 21.9 | 24.3 | 0.9  |
| Dhcr7    | 7-dehydrocholesterol reductase                                                 | 21.9 | 6.6  | 3.3  |
| Gls      | glutaminase                                                                    | 21.9 | 2.0  | 11.2 |
| Arf1     | ADP-ribosylation factor 1                                                      | 21.9 | 18.3 | 1.2  |
| Ndufa4   | NADH dehydrogenase (ubiquinone) 1 alpha subcomplex, 4 [ MGI:21814]             | 21.8 | 3.0  | 7.4  |
| Srpk1    | serine/arginine-rich protein specific kinase 1                                 | 21.8 | 3.5  | 6.2  |
| Ppp4r2   | protein phosphatase 4, regulatory subunit 2 [ MGI:3027896]                     | 21.8 | 3.2  | 6.8  |
| Atp13a3  | ATPase type 13A3                                                               | 21.8 | 8.2  | 2.7  |
| Rsl24d1  | ribosomal L24 domain containing 1                                              | 21.8 | 7.1  | 3.1  |
| Thbd     | thrombomodulin                                                                 | 21.8 | 11.8 | 1.8  |
| Rps28    | ribosomal protein S28                                                          | 21.8 | 1.4  | 15.2 |
| Cstb     | cystatin B [ MGI:109514]                                                       | 21.8 | 3.0  | 7.3  |
| Fdx11    | ferredoxin 1-like [ MGI:1915415]                                               | 21.8 | 2.9  | 7.6  |
| Frs2     | fibroblast growth factor receptor substrate 2 [ MGI:1100860]                   | 21.7 | 13.5 | 1.6  |
| Ano6     | anoctamin 6 [ MGI:2145890]                                                     | 21.7 | 10.1 | 2.1  |



|           |                                                                        |      |      |       |
|-----------|------------------------------------------------------------------------|------|------|-------|
| Ube3a     | ubiquitin protein ligase E3A [ MGI:105098]                             | 21.7 | 3.6  | 6.1   |
| Srcap     | Snf2-related CREBBP activator protein [ MGI:2444036]                   | 21.7 | 20.0 | 1.1   |
| Lypla1    | lysophospholipase 1                                                    | 21.7 | 2.0  | 10.9  |
| Larp4     | La ribonucleoprotein domain family, member 4 [ MGI:2443114]            | 21.7 | 3.2  | 6.8   |
| Pgam1     | phosphoglycerate mutase 1 [ MGI:97552]                                 | 21.6 | 12.7 | 1.7   |
| Fgfr1     | fibroblast growth factor receptor 1                                    | 21.6 | 34.5 | 0.6   |
| Rab8b     | RAB8B, member RAS oncogene family [ MGI:2442982]                       | 21.6 | 3.4  | 6.4   |
| Decr2     | 2-4-dienoyl-Coenzyme A reductase 2, peroxisomal                        | 21.6 | 2.2  | 9.7   |
| Rps21     | ribosomal protein S21                                                  | 21.6 | 7.1  | 3.0   |
| Ptpn23    | protein tyrosine phosphatase, non-receptor type 23 [ MGI:2144837]      | 21.5 | 31.0 | 0.7   |
| Uhmk1     | U2AF homology motif UHM kinase 1                                       | 21.5 | 3.9  | 5.5   |
| Grem2     | gremlin 2 homolog, cysteine knot superfamily ( <i>Xenopus laevis</i> ) | 21.4 | 10.8 | 2.0   |
| Purb      | purine rich element binding protein B                                  | 21.4 | 3.1  | 6.9   |
| Plk2      | polo-like kinase 2 [ MGI:1099790]                                      | 21.4 | 9.5  | 2.3   |
| Golt1b    | golgi transport 1 homolog B ( <i>S. cerevisiae</i> )                   | 21.4 | 6.9  | 3.1   |
| Cd24a     | CD24a antigen [ MGI:88323]                                             | 21.4 | 3.8  | 5.7   |
| Prnp      | prion protein                                                          | 21.4 | 3.3  | 6.5   |
| Txn1      | thioredoxin 1                                                          | 21.4 | 2.3  | 9.4   |
| Ext2      | exostoses (multiple) 2                                                 | 21.3 | 4.4  | 4.9   |
| Gadd45b   | growth arrest and DNA-damage-inducible 45 beta [ MGI:107776]           | 21.3 | 2.8  | 7.5   |
| Ogn       | osteoglycin [ MGI:109278]                                              | 21.2 | 0.4  | 56.7  |
| S1pr2     | sphingosine-1-phosphate receptor 2 [ MGI:99569]                        | 21.2 | 5.9  | 3.6   |
| Tax1bp3   | Tax1 (human T-cell leukemia virus type I) binding protein 3            | 21.2 | 10.6 | 2.0   |
| Ubap2l    | ubiquitin associated protein 2-like [ MGI:1921633]                     | 21.1 | 31.7 | 0.7   |
| R3hdm1    | R3H domain containing 1 [ MGI:2448514]                                 | 21.1 | 22.3 | 0.9   |
| Zcchc9    | zinc finger, CCHC domain containing 9                                  | 21.1 | 2.5  | 8.4   |
| RP23-369M | novel protein                                                          | 21.0 | 0.1  | 198.0 |
| Rpl18     | ribosomal protein L18                                                  | 21.0 | 4.0  | 5.3   |
| Cfdp1     | craniofacial development protein 1 [ MGI:1344403]                      | 21.0 | 0.7  | 28.5  |
| Glrx3     | glutaredoxin 3 [ MGI:1353653]                                          | 21.0 | 2.3  | 9.3   |
| Ddx5      | DEAD (Asp-Glu-Ala-Asp) box polypeptide 5                               | 21.0 | 3.7  | 5.7   |
| Tns1      | tensin 1 [ MGI:104552]                                                 | 20.9 | 25.0 | 0.8   |
| Sc5d      | sterol-C5-desaturase (fungal ERG3, delta-5-desaturase) homolog (S      | 20.9 | 4.1  | 5.1   |
| Fbxw8     | F-box and WD-40 domain protein 8 [ MGI:1923041]                        | 20.9 | 11.2 | 1.9   |
| Vps35     | vacuolar protein sorting 35 [ MGI:1890467]                             | 20.9 | 2.6  | 8.1   |
| Glud1     | glutamate dehydrogenase 1                                              | 20.8 | 5.2  | 4.0   |
| Pdia3     | protein disulfide isomerase associated 3                               | 20.8 | 6.8  | 3.1   |
| Dab2      | disabled homolog 2 ( <i>Drosophila</i> )                               | 20.8 | 10.0 | 2.1   |
| Pacsin2   | protein kinase C and casein kinase substrate in neurons 2 [ MGI:13     | 20.8 | 4.0  | 5.3   |
| Rassf1    | Ras association (RalGDS/AF-6) domain family 1                          | 20.8 | 4.2  | 5.0   |
| Tm9sf4    | transmembrane 9 superfamily protein member 4                           | 20.8 | 12.4 | 1.7   |
| Gorasp2   | golgi reassembly stacking protein 2                                    | 20.8 | 16.0 | 1.3   |
| Hspb11    | heat shock protein family B (small), member 11                         | 20.8 | 0.1  | 287.9 |
| Furin     | furin (paired basic amino acid cleaving enzyme)                        | 20.7 | 29.1 | 0.7   |
| Smurf1    | SMAD specific E3 ubiquitin protein ligase 1                            | 20.7 | 9.7  | 2.1   |
| Tspan5    | tetraspanin 5                                                          | 20.6 | 7.1  | 2.9   |
| Tmem167l  | transmembrane protein 167B                                             | 20.6 | 3.9  | 5.3   |

|           |                                                                    |      |      |      |
|-----------|--------------------------------------------------------------------|------|------|------|
| Pdrg1     | p53 and DNA damage regulated 1                                     | 20.6 | 13.5 | 1.5  |
| Wsb1      | WD repeat and SOCS box-containing 1                                | 20.6 | 3.2  | 6.5  |
| Fhl1      | four and a half LIM domains 1                                      | 20.6 | 6.6  | 3.1  |
| Cacul1    | CDK2 associated, cullin domain 1 [ MGI:1926082]                    | 20.6 | 4.6  | 4.5  |
| Ythdf3    | YTH domain family 3 [ MGI:1918850]                                 | 20.6 | 2.3  | 8.8  |
| Mocs1     | molybdenum cofactor synthesis 1                                    | 20.5 | 3.8  | 5.4  |
| Smg7      | Smg-7 homolog, nonsense mediated mRNA decay factor (C. elegans)    | 20.5 | 6.8  | 3.0  |
| 2700089E2 | RIKEN cDNA 2700089E24 gene [ MGI:1914379]                          | 20.5 | 2.6  | 7.8  |
| Tpm2      | tropomyosin 2 beta                                                 | 20.5 | 18.4 | 1.1  |
| Coa5      | novel protein                                                      | 20.5 | 11.9 | 1.7  |
| Sh3pxd2b  | SH3 and PX domains 2B                                              | 20.5 | 17.5 | 1.2  |
| RP23-478A | novel UPF0608 family membrane protein homologous to C19orf42 (20.5 | 20.5 | 1.9  | 10.8 |
| Epb4.113  | erythrocyte protein band 4.1-like 3 [ MGI:103008]                  | 20.3 | 6.6  | 3.1  |
| Fech      | ferrochelatase [ MGI:95513]                                        | 20.3 | 5.0  | 4.0  |
| Prdx2     | peroxiredoxin 2                                                    | 20.3 | 4.4  | 4.6  |
| Pmp22     | peripheral myelin protein                                          | 20.2 | 6.2  | 3.3  |
| Erlin2    | ER lipid raft associated 2 [ MGI:2387215]                          | 20.2 | 6.1  | 3.3  |
| Srcap     | Snf2-related CREBBP activator protein [ MGI:2444036]               | 20.1 | 32.5 | 0.6  |
| Hdgf      | hepatoma-derived growth factor                                     | 20.1 | 20.0 | 1.0  |
| Shoc2     | soc-2 (suppressor of clear) homolog (C. elegans) [ MGI:1927197]    | 20.0 | 4.7  | 4.3  |
| Sec23a    | SEC23A (S. cerevisiae)                                             | 20.0 | 2.0  | 10.2 |
| Sdpr      | serum deprivation response [ MGI:99513]                            | 20.0 | 3.4  | 5.8  |
| Srpr      | signal recognition particle receptor ('docking protein')           | 20.0 | 14.6 | 1.4  |
| Smarcc1   | SWI/SNF related matrix associated actin dependent regulator of ch  | 19.9 | 9.0  | 2.2  |
| Zc3h11a   | zinc finger CCCH type containing 11A [ MGI:1917829]                | 19.9 | 8.3  | 2.4  |
| RP23-452I | novel protein (KIAA1191)                                           | 19.9 | 11.7 | 1.7  |
| Runx1     | runt related transcription factor 1 [ MGI:99852]                   | 19.9 | 6.5  | 3.1  |
| Fads1     | fatty acid desaturase 1 [ MGI:1923517]                             | 19.8 | 14.9 | 1.3  |
| Tcf7l2    | transcription factor 7-like 2, T-cell specific, HMG-box            | 19.8 | 11.0 | 1.8  |
| Lrrn4cl   | LRRN4 C-terminal like [ MGI:1916102]                               | 19.8 | 2.4  | 8.1  |
| Lmna      | lamin A                                                            | 19.8 | 9.2  | 2.1  |
| Ankrd13c  | ankyrin repeat domain 13c [ MGI:2139746]                           | 19.7 | 3.0  | 6.5  |
| 7-Sep     | septin 7 [ MGI:1335094]                                            | 19.7 | 1.5  | 13.2 |
| Sec63     | SEC63-like (S. cerevisiae)                                         | 19.7 | 13.0 | 1.5  |
| Akr1b10   | aldo-keto reductase family 1, member B10 (aldose reductase)        | 19.7 | 3.5  | 5.6  |
| H3f3b     | H3 histone, family 3B                                              | 19.7 | 4.9  | 4.0  |
| Tfg       | Trk-fused gene                                                     | 19.6 | 4.7  | 4.2  |
| Igln5     | IgLON family member 5                                              | 19.6 | 52.7 | 0.4  |
| Bcap31    | B-cell receptor-associated protein 31                              | 19.6 | 3.3  | 6.0  |
| Inf2      | inverted formin, FH2 and WH2 domain containing [ MGI:1917685]      | 19.6 | 20.6 | 1.0  |
| Tbx3      | T-box 3                                                            | 19.6 | 9.5  | 2.1  |
| Fndc3a    | fibronectin type III domain containing 3A                          | 19.6 | 2.5  | 7.8  |
| Smarca2   | SWI/SNF related, matrix associated, actin dependent regulator of c | 19.6 | 4.8  | 4.1  |
| Irs1      | insulin receptor substrate 1                                       | 19.6 | 9.5  | 2.1  |
| Prdm2     | PR domain containing 2, with ZNF domain                            | 19.5 | 14.4 | 1.4  |
| Itm2b     | integral membrane protein 2B [ MGI:1309517]                        | 19.5 | 4.4  | 4.5  |
| S100a10   | S100 calcium binding protein A10 (calpactin)                       | 19.5 | 3.7  | 5.3  |

|          |                                                                                                |      |      |       |
|----------|------------------------------------------------------------------------------------------------|------|------|-------|
| Ddit4    | DNA-damage-inducible transcript 4 [ MGI:1921997]                                               | 19.5 | 7.3  | 2.7   |
| Gla      | galactosidase, alpha                                                                           | 19.4 | 1.7  | 11.1  |
| Polr2a   | polymerase (RNA) II (DNA directed) polypeptide A                                               | 19.4 | 27.2 | 0.7   |
| Ranbp1   | RAN binding protein 1                                                                          | 19.4 | 5.3  | 3.7   |
| Rab18    | RAB18, member RAS oncogene family [ MGI:102790]                                                | 19.4 | 2.4  | 8.2   |
| Stc2     | stanniocalcin 2                                                                                | 19.4 | 1.4  | 13.7  |
| Osr1     | odd-skipped related 1 (Drosophila) [ MGI:1344424]                                              | 19.4 | 8.1  | 2.4   |
| AC156982 | novel protein, possible orthologue of human chromosome 10 open                                 | 19.4 | 11.0 | 1.8   |
| Ifnar1   | interferon (alpha and beta) receptor 1                                                         | 19.3 | 6.4  | 3.0   |
| Dlst     | dihydrolipoamide S-succinyltransferase (E2 component of 2-oxo-glutarate dehydrogenase complex) | 19.3 | 4.2  | 4.6   |
| Timp1    | tissue inhibitor of metalloproteinase 1                                                        | 19.3 | 3.8  | 5.1   |
| Msi2     | Musashi homolog 2 (Drosophila)                                                                 | 19.3 | 7.1  | 2.7   |
| Cbx5     | chromobox homolog 5 (Drosophila HP1a)                                                          | 19.3 | 6.6  | 2.9   |
| Sdc2     | syndecan 2                                                                                     | 19.3 | 5.1  | 3.8   |
| Sod1     | superoxide dismutase 1, soluble [ MGI:98351]                                                   | 19.3 | 5.0  | 3.8   |
| Zfp3612  | zinc finger protein 36, C3H type-like 2                                                        | 19.2 | 16.0 | 1.2   |
| Ncln     | nicalin homolog (zebrafish)                                                                    | 19.1 | 11.8 | 1.6   |
| Lclat1   | lysocardiolipin acyltransferase 1                                                              | 19.1 | 14.1 | 1.4   |
| Mtch1    | mitochondrial carrier homolog 1 (C. elegans)                                                   | 19.1 | 6.7  | 2.8   |
| Tmem33   | transmembrane protein 33                                                                       | 19.1 | 5.2  | 3.7   |
| Creb3l2  | cAMP responsive element binding protein 3-like 2                                               | 19.1 | 17.3 | 1.1   |
| Tab2     | mitogen-activated protein kinase kinase kinase 7 interacting protein                           | 19.0 | 13.0 | 1.5   |
| Rps9     | ribosomal protein S9                                                                           | 19.0 | 9.7  | 2.0   |
| Gucyl1a2 | guanylate cyclase 1, soluble, alpha 2 [ MGI:2660877]                                           | 19.0 | 3.0  | 6.3   |
| Raver1   | ribonucleoprotein, PTB-binding 1 [ MGI:1919016]                                                | 18.9 | 38.6 | 0.5   |
| Aplp1    | amyloid beta (A4) precursor-like protein 1 [ MGI:88046]                                        | 18.9 | 28.9 | 0.7   |
| Tmem123  | transmembrane protein 123                                                                      | 18.9 | 7.1  | 2.7   |
| Matr3    | matrin 3 [ MGI:1298379]                                                                        | 18.9 | 2.2  | 8.7   |
| Gpr176   | G protein-coupled receptor 176                                                                 | 18.9 | 8.1  | 2.3   |
| Actn1    | actinin, alpha 1 [ MGI:2137706]                                                                | 18.9 | 25.1 | 0.8   |
| Polr3g1  | polymerase (RNA) III (DNA directed) polypeptide G like                                         | 18.9 | 0.2  | 120.5 |
| Rab12    | RAB12, member RAS oncogene family                                                              | 18.9 | 3.9  | 4.9   |
| Itga11   | integrin alpha 11                                                                              | 18.9 | 11.3 | 1.7   |
| Fat1     | FAT tumor suppressor homolog 1 (Drosophila) [ MGI:109168]                                      | 18.8 | 16.4 | 1.1   |
| Trerf1   | transcriptional regulating factor 1 [ MGI:2442086]                                             | 18.8 | 8.9  | 2.1   |
| Igf1r    | insulin-like growth factor I receptor [ MGI:96433]                                             | 18.8 | 12.3 | 1.5   |
| Coq10b   | coenzyme Q10 homolog B (S. cerevisiae) [ MGI:1915126]                                          | 18.8 | 1.6  | 11.9  |
| Ccdc6    | coiled-coil domain containing 6                                                                | 18.7 | 8.8  | 2.1   |
| Rnf24    | ring finger protein 24                                                                         | 18.7 | 19.6 | 1.0   |
| Tmem248  | transmembrane protein 248 [ MGI:1918917]                                                       | 18.6 | 5.8  | 3.2   |
| Sfxn1    | sideroflexin 1 [ MGI:2137677]                                                                  | 18.6 | 4.4  | 4.2   |
| Dusp11   | dual specificity phosphatase 11 (RNA/RNP complex 1-interacting)                                | 18.5 | 12.4 | 1.5   |
| Sar1a    | SAR1 gene homolog A (S. cerevisiae) [ MGI:98230]                                               | 18.5 | 8.0  | 2.3   |
| Fblim1   | filamin binding LIM protein 1                                                                  | 18.4 | 18.3 | 1.0   |
| Arpc5    | actin related protein 2/3 complex, subunit 5                                                   | 18.4 | 3.6  | 5.1   |
| Nmt2     | N-myristoyltransferase 2                                                                       | 18.4 | 2.6  | 7.0   |
| Mgp      | matrix Gla protein [ MGI:96976]                                                                | 18.4 | 2.3  | 7.9   |

|           |                                                                           |      |      |      |
|-----------|---------------------------------------------------------------------------|------|------|------|
| Ctsl      | cathepsin L [ MGI:88564]                                                  | 18.4 | 8.9  | 2.1  |
| Mtap4     | microtubule-associated protein 4                                          | 18.3 | 10.7 | 1.7  |
| Slc48a1   | solute carrier family 48 (heme transporter), member 1                     | 18.3 | 17.5 | 1.0  |
| Wnk1      | WNK lysine deficient protein kinase 1                                     | 18.3 | 9.6  | 1.9  |
| AW54987   | expressed sequence AW549877 [ MGI:2146232]                                | 18.2 | 5.3  | 3.4  |
| Btg2      | B-cell translocation gene 2, anti-proliferative                           | 18.2 | 12.3 | 1.5  |
| Coro1c    | coronin, actin binding protein 1C                                         | 18.2 | 8.0  | 2.3  |
| Csnk1e    | casein kinase 1, epsilon                                                  | 18.2 | 6.3  | 2.9  |
| Hspd1     | heat shock protein 1 (chaperonin)                                         | 18.2 | 3.8  | 4.8  |
| Mical2    | microtubule associated monooxygenase, calponin and LIM domain c           | 18.2 | 13.1 | 1.4  |
| Fads2     | fatty acid desaturase 2 [ MGI:1930079]                                    | 18.1 | 15.3 | 1.2  |
| Arsb      | arylsulfatase B [ MGI:88075]                                              | 18.1 | 20.0 | 0.9  |
| Strap     | serine/threonine kinase receptor associated protein                       | 18.1 | 4.4  | 4.1  |
| Arl16     | ADP-ribosylation factor-like 16                                           | 18.1 | 1.3  | 13.4 |
| Hnrnp1    | heterogeneous nuclear ribonucleoprotein L                                 | 18.1 | 4.3  | 4.2  |
| Vegfa     | vascular endothelial growth factor A                                      | 18.1 | 11.5 | 1.6  |
| Rfx7      | regulatory factor X, 7 [ MGI:2442675]                                     | 18.1 | 6.1  | 3.0  |
| Reep5     | receptor accessory protein 5 [ MGI:1270152]                               | 18.0 | 3.8  | 4.8  |
| Hspe1     | heat shock protein 1 chaperonin 10                                        | 17.9 | 4.8  | 3.8  |
| Npc2      | Niemann Pick type C2 [ MGI:1915213]                                       | 17.9 | 4.7  | 3.8  |
| Man1a     | mannosidase 1, alpha                                                      | 17.9 | 1.7  | 10.4 |
| Hsd17b7   | hydroxysteroid (17-beta) dehydrogenase 7                                  | 17.8 | 4.5  | 4.0  |
| Hmgcs1    | 3-hydroxy-3-methylglutaryl-Coenzyme A synthase 1 [ MGI:107592             | 17.8 | 4.0  | 4.5  |
| Cxcl14    | chemokine (C-X-C motif) ligand 14 [ MGI:1888514]                          | 17.8 | 8.3  | 2.1  |
| Trove2    | TROVE domain family, member 2                                             | 17.8 | 2.1  | 8.4  |
| Csnk1g1   | casein kinase 1, gamma 1                                                  | 17.7 | 9.9  | 1.8  |
| Cyth3     | cytohesin 3                                                               | 17.7 | 8.5  | 2.1  |
| Tcf3      | transcription factor 3                                                    | 17.7 | 16.9 | 1.0  |
| RP23-146I | novel protein                                                             | 17.7 | 2.9  | 6.1  |
| Ltbp1     | latent transforming growth factor beta binding protein 1                  | 17.7 | 7.9  | 2.2  |
| Ccdc97    | coiled-coil domain containing 97                                          | 17.7 | 45.8 | 0.4  |
| Cd63      | CD63 antigen [ MGI:99529]                                                 | 17.7 | 8.3  | 2.1  |
| Peg3      | paternally expressed 3                                                    | 17.7 | 6.0  | 2.9  |
| Gnai1     | guanine nucleotide binding protein (G protein), alpha inhibiting 1 [ 17.7 | 17.7 | 1.9  | 9.2  |
| Snai2     | snail homolog 2 (Drosophila) [ MGI:1096393]                               | 17.7 | 3.7  | 4.8  |
| Med15     | mediator complex subunit 15 [ MGI:2137379]                                | 17.7 | 9.3  | 1.9  |
| Lrp1      | low density lipoprotein receptor-related protein 1                        | 17.6 | 17.6 | 1.0  |
| Bzw1      | basic leucine zipper and W2 domains 1 [ MGI:1914132]                      | 17.6 | 4.7  | 3.8  |
| Stard4    | StAR-related lipid transfer (START) domain containing 4                   | 17.6 | 1.7  | 10.1 |
| Slc20a1   | solute carrier family 20, member 1                                        | 17.6 | 2.5  | 7.0  |
| Ube2v1    | ubiquitin-conjugating enzyme E2 variant 1                                 | 17.6 | 40.8 | 0.4  |
| Fam53c    | family with sequence similarity 53, member C [ MGI:1913556]               | 17.6 | 9.7  | 1.8  |
| Isoc1     | isochorismatase domain containing 1 [ MGI:1913557]                        | 17.6 | 3.0  | 5.9  |
| Adamts5   | a disintegrin-like and metallopeptidase (reprolysin type) with thron      | 17.5 | 2.4  | 7.2  |
| Srp19     | signal recognition particle 19                                            | 17.5 | 1.0  | 17.0 |
| Socs4     | suppressor of cytokine signaling 4                                        | 17.5 | 4.2  | 4.2  |
| Hbegf     | heparin-binding EGF-like growth factor [ MGI:96070]                       | 17.5 | 7.3  | 2.4  |

|           |                                                                       |      |      |      |
|-----------|-----------------------------------------------------------------------|------|------|------|
| Hook3     | hook homolog 3 (Drosophila)                                           | 17.4 | 2.2  | 8.0  |
| Srm       | spermidine synthase                                                   | 17.4 | 9.0  | 1.9  |
| Diap2     | diaphanous homolog 2 (Drosophila)                                     | 17.4 | 4.7  | 3.7  |
| Rpl35     | ribosomal protein L35                                                 | 17.4 | 1.8  | 9.5  |
| Kdm2a     | lysine (K)-specific demethylase 2A                                    | 17.3 | 8.2  | 2.1  |
| Fstl3     | follistatin-like 3                                                    | 17.3 | 9.4  | 1.8  |
| Nfic      | nuclear factor I/C                                                    | 17.3 | 55.3 | 0.3  |
| Hspa4     | heat shock protein 4                                                  | 17.2 | 4.5  | 3.9  |
| D8ErtD738 | DNA segment, Chr 8, ERATO Doi 738, expressed [ MGI:1289231]           | 17.2 | 2.3  | 7.5  |
| Psmb2     | proteasome (prosome, macropain) subunit, beta type 2                  | 17.2 | 3.7  | 4.6  |
| Igf1      | insulin-like growth factor 1                                          | 17.2 | 1.9  | 9.2  |
| Eda2r     | ectodysplasin A2 isoform receptor                                     | 17.2 | 3.4  | 5.1  |
| Actn4     | actinin alpha 4                                                       | 17.1 | 17.6 | 1.0  |
| Prkab1    | protein kinase AMP-activated beta 1 non-catalytic subunit             | 17.1 | 2.8  | 6.1  |
| Magt1     | magnesium transporter 1                                               | 17.1 | 3.3  | 5.2  |
| Pafah1b1  | platelet-activating factor acetylhydrolase, isoform 1b, beta1 subunit | 17.1 | 2.9  | 5.8  |
| Kpna6     | karyopherin (importin) alpha 6                                        | 17.1 | 20.7 | 0.8  |
| Wbp2      | WW domain binding protein 2                                           | 17.1 | 45.9 | 0.4  |
| Alkbh5    | alkB, alkylation repair homolog 5 (E. coli)                           | 17.1 | 5.5  | 3.1  |
| Hist1h1c  | histone 1, H1c                                                        | 17.1 | 3.0  | 5.6  |
| Basp1     | brain abundant, membrane attached signal protein 1 [ MGI:191760]      | 17.0 | 4.5  | 3.8  |
| Cops2     | COP9 (constitutive photomorphogenic) homolog, subunit 2 (Arabidopsis) | 17.0 | 1.9  | 9.2  |
| Usf2      | upstream transcription factor 2                                       | 17.0 | 9.7  | 1.7  |
| Ilk       | integrin linked kinase                                                | 16.9 | 12.8 | 1.3  |
| Prrc2c    | proline-rich coiled-coil 2C                                           | 16.9 | 11.1 | 1.5  |
| Nars      | asparaginyl-tRNA synthetase [ MGI:1917473]                            | 16.9 | 5.4  | 3.1  |
| Mtss1l    | metastasis suppressor 1-like                                          | 16.9 | 20.2 | 0.8  |
| Mea1      | male enhanced antigen 1 [ MGI:96957]                                  | 16.9 | 49.9 | 0.3  |
| Gpc1      | glypican 1 [ MGI:1194891]                                             | 16.9 | 14.7 | 1.1  |
| Pcdh19    | protocadherin 19                                                      | 16.8 | 8.1  | 2.1  |
| Gas7      | growth arrest specific 7                                              | 16.8 | 9.5  | 1.8  |
| Sumo1     | SMT3 suppressor of mif two 3 homolog 1 (yeast)                        | 16.8 | 1.1  | 15.3 |
| Abhd17c   | abhydrolase domain containing 17C [ MGI:1917428]                      | 16.8 | 6.1  | 2.8  |
| Fbn1      | fibrillin 1                                                           | 16.8 | 14.8 | 1.1  |
| Ankrd52   | ankyrin repeat domain 52                                              | 16.8 | 44.7 | 0.4  |
| Chst2     | carbohydrate sulfotransferase 2 [ MGI:1891160]                        | 16.8 | 4.0  | 4.2  |
| Camk2d    | calcium/calmodulin-dependent protein kinase II, delta                 | 16.8 | 4.3  | 3.9  |
| Rps14     | ribosomal protein S14                                                 | 16.8 | 4.3  | 3.9  |
| Ikbip     | Novel IKK interacting protein                                         | 16.8 | 2.4  | 6.9  |
| Ly96      | lymphocyte antigen 96 [ MGI:1341909]                                  | 16.8 | 0.6  | 25.9 |
| Rras      | Harvey rat sarcoma oncogene, subgroup R                               | 16.8 | 7.6  | 2.2  |
| Tubb4b    | tubulin, beta 2C                                                      | 16.8 | 4.3  | 3.9  |
| Ncor2     | nuclear receptor co-repressor 2                                       | 16.7 | 29.4 | 0.6  |
| Rab2a     | RAB2A, member RAS oncogene family                                     | 16.7 | 3.2  | 5.1  |
| Myc       | myelocytomatosis oncogene                                             | 16.7 | 7.3  | 2.3  |
| Mras      | muscle and microspikes RAS                                            | 16.7 | 8.6  | 1.9  |
| Cercam    | cerebral endothelial cell adhesion molecule                           | 16.6 | 11.9 | 1.4  |

|           |                                                                      |      |      |      |
|-----------|----------------------------------------------------------------------|------|------|------|
| Akr1a1    | aldo-keto reductase family 1, member A4 (aldehyde reductase)         | 16.6 | 7.3  | 2.3  |
| Ski       | Sloan-Kettering viral oncogene homolog                               | 16.6 | 21.7 | 0.8  |
| Nr2f2     | nuclear receptor subfamily 2, group F, member 2                      | 16.6 | 5.7  | 2.9  |
| Mrc2      | mannose receptor, C type 2                                           | 16.6 | 10.3 | 1.6  |
| Btg1      | B cell translocation gene 1, anti-proliferative [ MGI:88215]         | 16.6 | 2.9  | 5.7  |
| Eif1      | eukaryotic translation initiation factor 1                           | 16.6 | 10.9 | 1.5  |
| Tmem43    | transmembrane protein 43                                             | 16.6 | 5.7  | 2.9  |
| Clcn5     | chloride channel 5                                                   | 16.6 | 7.8  | 2.1  |
| Slc7a5    | solute carrier family 7 (cationic amino acid transporter, y+ system) | 16.6 | 8.7  | 1.9  |
| Slc25a4   | solute carrier family 25 (mitochondrial carrier, adenine nucleotide) | 16.5 | 6.2  | 2.7  |
| Lman2     | lectin, mannose-binding 2 [ MGI:1914140]                             | 16.5 | 10.6 | 1.6  |
| Appbp2    | amyloid beta precursor protein (cytoplasmic tail) binding protein 2  | 16.5 | 3.5  | 4.7  |
| Sulf2     | sulfatase 2                                                          | 16.5 | 14.2 | 1.2  |
| RP24-535P | novel protein                                                        | 16.5 | 9.6  | 1.7  |
| Etf1      | eukaryotic translation termination factor 1                          | 16.5 | 2.5  | 6.5  |
| Shisa4    | shisa homolog 4 ( <i>Xenopus laevis</i> )                            | 16.5 | 11.8 | 1.4  |
| Manea     | mannosidase, endo-alpha                                              | 16.5 | 1.1  | 14.3 |
| Ubxn1     | UBX domain protein 1 [ MGI:1289301]                                  | 16.5 | 4.8  | 3.5  |
| Ctdsp2    | CTD (carboxy-terminal domain, RNA polymerase II, polypeptide A)      | 16.4 | 23.4 | 0.7  |
| Mmp2      | matrix metalloproteinase 2 [ MGI:97009]                              | 16.3 | 8.7  | 1.9  |
| Cat       | catalase                                                             | 16.3 | 0.6  | 25.4 |
| Xiap      | X-linked inhibitor of apoptosis                                      | 16.3 | 2.5  | 6.5  |
| Hnrnpa0   | heterogeneous nuclear ribonucleoprotein A0 [ MGI:1924384]            | 16.3 | 2.8  | 5.9  |
| Tulp4     | tubby like protein 4                                                 | 16.3 | 14.8 | 1.1  |
| Rpl35a    | ribosomal protein L35a                                               | 16.3 | 3.7  | 4.4  |
| Kdelc2    | KDEL (Lys-Asp-Glu-Leu) containing 2 [ MGI:1923765]                   | 16.2 | 2.0  | 8.0  |
| Plaa      | phospholipase A2, activating protein                                 | 16.2 | 1.2  | 13.4 |
| Tex261    | testis expressed gene 261                                            | 16.2 | 17.0 | 1.0  |
| Gatad2a   | GATA zinc finger domain containing 2A [ MGI:2384585]                 | 16.2 | 12.9 | 1.3  |
| Vhl       | von Hippel-Lindau syndrome                                           | 16.1 | 3.2  | 5.0  |
| Aplp2     | amyloid beta (A4) precursor-like protein 2 [ MGI:88047]              | 16.1 | 18.9 | 0.9  |
| Foxo3     | forkhead box O3                                                      | 16.1 | 5.0  | 3.2  |
| Slc25a44  | solute carrier family 25, member 44 [ MGI:2444391]                   | 16.1 | 13.1 | 1.2  |
| C1galt1   | core 1 UDP-galactose:N-acetylgalactosamine-alpha-R beta 1,3-galact   | 16.1 | 1.9  | 8.4  |
| Comt      | catechol-O-methyltransferase 1                                       | 16.0 | 5.2  | 3.1  |
| Aff4      | AF4/FMR2 family, member 4                                            | 16.0 | 7.6  | 2.1  |
| Kcnj15    | potassium inwardly-rectifying channel, subfamily J, member 15        | 16.0 | 5.7  | 2.8  |
| Map1b     | microtubule-associated protein 1B [ MGI:1306778]                     | 16.0 | 5.4  | 2.9  |
| Eif3i     | eukaryotic translation initiation factor 3, subunit I                | 16.0 | 4.6  | 3.5  |
| B4galt7   | xylosylprotein beta1,4-galactosyltransferase, polypeptide 7 (galact  | 15.9 | 4.7  | 3.4  |
| Rhob      | ras homolog gene family, member B [ MGI:107949]                      | 15.9 | 8.2  | 1.9  |
| Acbd3     | acyl-Coenzyme A binding domain containing 3 [ MGI:2181074]           | 15.8 | 2.9  | 5.5  |
| Hmga1     | high mobility group AT-hook 1                                        | 15.8 | 71.8 | 0.2  |
| E2f4      | E2F transcription factor 4 [ MGI:103012]                             | 15.8 | 29.0 | 0.5  |
| Tmed10    | transmembrane emp24-like trafficking protein 10 (yeast) [ MGI:19     | 15.8 | 8.9  | 1.8  |
| Ywhaq     | tyrosine 3-monooxygenase/tryptophan 5-monooxygenase activator        | 15.8 | 5.6  | 2.8  |
| Rgl1      | ral guanine nucleotide dissociation stimulator,-like 1               | 15.8 | 8.2  | 1.9  |

|           |                                                                      |      |      |       |
|-----------|----------------------------------------------------------------------|------|------|-------|
| Flnb      | filamin, beta                                                        | 15.7 | 12.3 | 1.3   |
| 4933426M  | RIKEN cDNA 4933426M11 gene [ MGI:2444661]                            | 15.7 | 29.3 | 0.5   |
| Rrn3      | RRN3 RNA polymerase I transcription factor homolog (yeast) [ MGI:156 | 15.6 | 3.1  | 5.0   |
| Itgb5     | integrin beta 5                                                      | 15.6 | 12.8 | 1.2   |
| 6-Mar     | membrane-associated ring finger (C3HC4) 6 [ MGI:2442773]             | 15.6 | 2.1  | 7.4   |
| Pon2      | paraoxonase 2                                                        | 15.6 | 1.8  | 8.8   |
| Fbxo11    | F-box protein 11                                                     | 15.6 | 3.7  | 4.2   |
| Slc31a2   | solute carrier family 31 (copper transporters), member 2             | 15.6 | 1.9  | 8.2   |
| Plbd2     | phospholipase B domain containing 2                                  | 15.6 | 43.0 | 0.4   |
| Cmtm3     | CKLF-like MARVEL transmembrane domain containing 3 [ MGI:15.5        | 15.5 | 21.7 | 0.7   |
| Zc3hav11  | zinc finger CCCH-type, antiviral 1-like                              | 15.5 | 7.0  | 2.2   |
| Nfia      | nuclear factor I/A                                                   | 15.5 | 7.2  | 2.1   |
| Mxra7     | matrix-remodelling associated 7                                      | 15.5 | 7.9  | 2.0   |
| Soat1     | sterol O-acyltransferase 1 [ MGI:104665]                             | 15.5 | 4.0  | 3.9   |
| Tceb3     | transcription elongation factor B (SIII), polypeptide 3              | 15.5 | 3.5  | 4.5   |
| Gadd45a   | growth arrest and DNA-damage-inducible 45 alpha                      | 15.5 | 5.5  | 2.8   |
| AC157561  | likely orthologue of H. sapiens chromosome 19 open reading frame     | 15.4 | 5.0  | 3.1   |
| Cpe       | carboxypeptidase E [ MGI:101932]                                     | 15.4 | 12.2 | 1.3   |
| Sfxn3     | sideroflexin 3 [ MGI:2137679]                                        | 15.4 | 52.3 | 0.3   |
| Gstm1     | glutathione S-transferase, mu 1                                      | 15.4 | 28.8 | 0.5   |
| Fyttd1    | forty-two-three domain containing 1                                  | 15.4 | 1.8  | 8.6   |
| Ccny11    | cyclin Y-like 1                                                      | 15.4 | 6.0  | 2.6   |
| Myh10     | myosin, heavy polypeptide 10, non-muscle                             | 15.4 | 10.8 | 1.4   |
| Dnajb1    | DnaJ (Hsp40) homolog, subfamily B, member 1 [ MGI:1931874]           | 15.4 | 2.7  | 5.6   |
| Sesn3     | sestrin 3                                                            | 15.4 | 7.1  | 2.2   |
| Pir       | pirin                                                                | 15.4 | 0.2  | 91.2  |
| Hist1h2bb | histone cluster 1, H2bb                                              | 15.3 | 0.1  | 128.8 |
| Anxa6     | annexin A6                                                           | 15.3 | 18.5 | 0.8   |
| Adam12    | a disintegrin and metallopeptidase domain 12 meltrin alpha           | 15.3 | 7.1  | 2.2   |
| Snx12     | sorting nexin 12                                                     | 15.3 | 5.9  | 2.6   |
| Ganab     | alpha glucosidase 2 alpha neutral subunit [ MGI:1097667]             | 15.2 | 17.8 | 0.9   |
| Spag7     | sperm associated antigen 7                                           | 15.2 | 2.2  | 7.0   |
| Rest      | RE1-silencing transcription factor                                   | 15.2 | 3.5  | 4.3   |
| Cggbp1    | CGG triplet repeat binding protein 1                                 | 15.1 | 3.7  | 4.1   |
| Ipo7      | importin 7 [ MGI:2152414]                                            | 15.1 | 2.1  | 7.3   |
| Eps15     | epidermal growth factor receptor pathway substrate 15                | 15.1 | 2.1  | 7.3   |
| Mtmr2     | myotubularin related protein 2                                       | 15.1 | 1.2  | 12.4  |
| Nabp1     | nucleic acid binding protein 1 [ MGI:1923258]                        | 15.1 | 1.7  | 8.7   |
| Nudt4     | nudix (nucleoside diphosphate linked moiety X)-type motif 4 [ MG     | 15.1 | 3.6  | 4.2   |
| Pacs2     | phosphofurin acidic cluster sorting protein 2 [ MGI:1924399]         | 15.1 | 10.5 | 1.4   |
| Llph      | LLP homolog, long-term synaptic facilitation (Aplysia)               | 15.1 | 2.7  | 5.6   |
| Prrg4     | proline rich Gla (G-carboxyglutamic acid) 4 (transmembrane)          | 15.1 | 2.6  | 5.8   |
| Bbx       | bobby sox homolog (Drosophila)                                       | 15.1 | 2.8  | 5.5   |
| Chchd2    | coiled-coil-helix-coiled-coil-helix domain containing 2              | 15.1 | 4.2  | 3.6   |
| Trp53     | transformation related protein 53                                    | 15.1 | 44.7 | 0.3   |
| Hist2h3c1 | histone cluster 2, H3c1                                              | 15.1 | 0.9  | 15.9  |
| Ubb       | ubiquitin B                                                          | 15.1 | 2.9  | 5.1   |

|          |                                                                      |      |      |      |
|----------|----------------------------------------------------------------------|------|------|------|
| Camk2g   | calcium/calmodulin-dependent protein kinase II gamma [ MGI:882       | 15.0 | 3.3  | 4.5  |
| Heg1     | HEG homolog 1 (zebrafish)                                            | 15.0 | 5.2  | 2.9  |
| Cxxc5    | CXXC finger 5 [ MGI:1914643]                                         | 15.0 | 7.6  | 2.0  |
| Uqcr10   | novel protein similar to human ubiquinol-cytochrome C reductase c    | 15.0 | 2.3  | 6.5  |
| Erbp2ip  | Erbp2 interacting protein [ MGI:1890169]                             | 15.0 | 2.9  | 5.1  |
| 5-Sep    | septin 5 [ MGI:1195461]                                              | 15.0 | 9.8  | 1.5  |
| Ap1g1    | adaptor protein complex AP-1, gamma 1 subunit                        | 15.0 | 2.5  | 5.9  |
| Irf2     | interferon regulatory factor 2 [ MGI:96591]                          | 15.0 | 7.2  | 2.1  |
| Etv6     | ets variant gene 6 (TEL oncogene)                                    | 14.9 | 2.9  | 5.2  |
| Sf1      | splicing factor 1                                                    | 14.9 | 13.1 | 1.1  |
| Shc1     | src homology 2 domain-containing transforming protein C1             | 14.9 | 15.3 | 1.0  |
| Ltbr     | lymphotoxin B receptor                                               | 14.9 | 8.3  | 1.8  |
| Dnajc18  | DnaJ (Hsp40) homolog, subfamily C, member 18 [ MGI:1923844]          | 14.8 | 4.3  | 3.5  |
| Spna2    | spectrin alpha 2                                                     | 14.8 | 12.0 | 1.2  |
| Mif      | macrophage migration inhibitory factor [ MGI:96982]                  | 14.8 | 2.8  | 5.2  |
| Bmp4     | bone morphogenetic protein 4                                         | 14.8 | 1.0  | 14.8 |
| Ago2     | argonaute RISC catalytic subunit 2 [ MGI:2446632]                    | 14.8 | 13.0 | 1.1  |
| Eif3d    | eukaryotic translation initiation factor 3, subunit D [ MGI:1933181] | 14.8 | 4.3  | 3.5  |
| Tom1l2   | target of myb1-like 2 (chicken)                                      | 14.8 | 12.8 | 1.2  |
| Tcf7l1   | transcription factor 7-like 2 (T-cell specific, HMG box)             | 14.8 | 44.8 | 0.3  |
| Uba52    | ubiquitin A-52 residue ribosomal protein fusion product 1            | 14.8 | 7.2  | 2.1  |
| Tlk1     | tousled-like kinase 1                                                | 14.7 | 1.6  | 9.1  |
| Qpctl    | glutaminy-peptide cyclotransferase-like [ MGI:1914619]               | 14.7 | 3.6  | 4.1  |
| Fam3c    | family with sequence similarity 3, member C                          | 14.7 | 0.9  | 15.8 |
| Grn      | granulin                                                             | 14.7 | 8.2  | 1.8  |
| Rap2b    | RAP2B, member of RAS oncogene family [ MGI:1921262]                  | 14.6 | 4.7  | 3.1  |
| Cct5     | chaperonin containing Tcp1, subunit 5 (epsilon)                      | 14.6 | 3.3  | 4.5  |
| Bmi1     | B lymphoma Mo-MLV insertion region 1                                 | 14.6 | 2.0  | 7.1  |
| Nono     | non-POU-domain-containing, octamer binding protein                   | 14.6 | 7.3  | 2.0  |
| C230081A | RIKEN cDNA C230081A13 gene [ MGI:2442366]                            | 14.6 | 11.4 | 1.3  |
| Ube2g1   | ubiquitin-conjugating enzyme E2G 1 (UBC7 homolog, C. elegans)        | 14.6 | 2.1  | 6.9  |
| Copz1    | coatamer protein complex, subunit zeta 1 [ MGI:1929063]              | 14.6 | 27.7 | 0.5  |
| Paip1    | polyadenylate binding protein-interacting protein 1                  | 14.6 | 1.9  | 7.7  |
| Acap2    | ArfGAP with coiled-coil, ankyrin repeat and PH domains 2 [ MGI:      | 14.6 | 2.3  | 6.4  |
| Wdfy1    | WD repeat and FYVE domain containing 1                               | 14.6 | 0.4  | 32.8 |
| Gm10479  | predicted gene 10479 [ MGI:3704385]                                  | 14.6 | 0.2  | 82.8 |
| Ssr1     | signal sequence receptor, alpha [ MGI:105082]                        | 14.5 | 3.6  | 4.0  |
| Jagn1    | jagunal homolog 1 (Drosophila)                                       | 14.5 | 1.5  | 9.8  |
| Celf2    | CUGBP, Elav-like family member 2                                     | 14.5 | 5.8  | 2.5  |
| Sdf4     | stromal cell derived factor 4                                        | 14.5 | 3.1  | 4.7  |
| Osmr     | oncostatin M receptor                                                | 14.5 | 2.5  | 5.9  |
| Rwdd4a   | RWD domain containing 4A                                             | 14.5 | 1.1  | 12.8 |
| Strn     | striatin, calmodulin binding protein                                 | 14.5 | 2.2  | 6.6  |
| Ell2     | elongation factor RNA polymerase II 2 [ MGI:2183438]                 | 14.5 | 5.1  | 2.8  |
| Tnfrsf22 | tumor necrosis factor receptor superfamily, member 22                | 14.5 | 16.0 | 0.9  |
| Elk3     | ELK3, member of ETS oncogene family                                  | 14.4 | 18.8 | 0.8  |
| Tmed7    | transmembrane emp24 protein transport domain containing 7            | 14.4 | 1.7  | 8.3  |



|          |                                                                      |      |       |      |
|----------|----------------------------------------------------------------------|------|-------|------|
| Maz      | MYC-associated zinc finger protein (purine-binding transcription f   | 14.4 | 30.0  | 0.5  |
| Anp32b   | acidic nuclear phosphoprotein 32 family, member B                    | 14.4 | 3.7   | 3.9  |
| Nfib     | nuclear factor I/B                                                   | 14.4 | 3.3   | 4.3  |
| Emc3     | transmembrane protein 111                                            | 14.4 | 2.6   | 5.6  |
| Rnf38    | ring finger protein 38                                               | 14.4 | 7.1   | 2.0  |
| Pdcd6ip  | programmed cell death 6 interacting protein                          | 14.4 | 11.5  | 1.3  |
| Siva1    | SIVA1, apoptosis-inducing factor [ MGI:1353606]                      | 14.4 | 3.7   | 3.9  |
| Tmem50a  | transmembrane protein 50A                                            | 14.4 | 2.6   | 5.5  |
| Arpc4    | actin related protein 2/3 complex, subunit 4                         | 14.3 | 9.2   | 1.6  |
| Zfp385a  | zinc finger protein 385A [ MGI:1352495]                              | 14.3 | 122.0 | 0.1  |
| Cfl2     | cofilin 2, muscle [ MGI:101763]                                      | 14.3 | 3.0   | 4.8  |
| Prkg1    | protein kinase, cGMP-dependent, type I                               | 14.3 | 1.9   | 7.5  |
| G3bp2    | GTPase activating protein (SH3 domain) binding protein 2 [ MGI:2     | 14.3 | 2.8   | 5.1  |
| Fnip1    | folliculin interacting protein 1                                     | 14.2 | 1.9   | 7.4  |
| Maml2    | mastermind like 2 (Drosophila)                                       | 14.2 | 8.4   | 1.7  |
| Pmpca    | peptidase (mitochondrial processing) alpha                           | 14.2 | 4.5   | 3.2  |
| Bnip3l   | BCL2/adenovirus E1B interacting protein 3-like                       | 14.2 | 4.8   | 3.0  |
| Rangap1  | RAN GTPase activating protein 1 [ MGI:103071]                        | 14.2 | 2.2   | 6.3  |
| Ttc9c    | tetratricopeptide repeat domain 9C                                   | 14.2 | 3.1   | 4.6  |
| Aspn     | asporin [ MGI:1913945]                                               | 14.2 | 2.1   | 6.9  |
| Ncl      | nucleolin [ MGI:97286]                                               | 14.2 | 3.2   | 4.4  |
| Rgmb     | RGM domain family, member B [ MGI:1916049]                           | 14.2 | 3.8   | 3.7  |
| Man2a1   | mannosidase 2, alpha 1                                               | 14.2 | 6.8   | 2.1  |
| 15-Sep   | selenoprotein                                                        | 14.1 | 4.0   | 3.5  |
| Dtnbp1   | dystrobrevin binding protein 1 [ MGI:2137586]                        | 14.1 | 1.9   | 7.5  |
| Isg20l2  | interferon stimulated exonuclease gene 20-like 2                     | 14.1 | 3.0   | 4.7  |
| Adi1     | acireductone dioxygenase 1                                           | 14.1 | 5.9   | 2.4  |
| Desi2    | novel protein (5830417C01Rik)                                        | 14.1 | 2.7   | 5.3  |
| Lrrc59   | leucine rich repeat containing 59                                    | 14.1 | 7.0   | 2.0  |
| Procr    | protein C receptor endothelial                                       | 14.0 | 1.0   | 14.3 |
| Wac      | WW domain containing adaptor with coiled-coil                        | 14.0 | 2.8   | 4.9  |
| Rad23b   | RAD23b homolog (S. cerevisiae)                                       | 14.0 | 8.6   | 1.6  |
| Hipk1    | homeodomain interacting protein kinase 1                             | 14.0 | 5.5   | 2.5  |
| Ptpn11   | protein tyrosine phosphatase non-receptor type 11                    | 14.0 | 8.0   | 1.7  |
| Crkl     | v-crk sarcoma virus CT10 oncogene homolog (avian)-like               | 14.0 | 3.3   | 4.3  |
| Nacc1    | nucleus accumbens associated 1, BEN and BTB (POZ) domain con         | 14.0 | 38.3  | 0.4  |
| Slc25a24 | solute carrier family 25 (mitochondrial carrier, phosphate carrier), | 13.9 | 2.4   | 5.7  |
| Bfar     | bifunctional apoptosis regulator                                     | 13.9 | 1.4   | 10.2 |
| Akap13   | A kinase (PRKA) anchor protein 13                                    | 13.9 | 5.6   | 2.5  |
| Ptplad1  | protein tyrosine phosphatase-like A domain containing 1 [ MGI:18     | 13.9 | 2.7   | 5.2  |
| Ube2g2   | ubiquitin-conjugating enzyme E2G 2                                   | 13.9 | 8.7   | 1.6  |
| Sae1     | SUMO1 activating enzyme subunit 1 [ MGI:1929264]                     | 13.9 | 2.8   | 5.0  |
| Hnrnpa1  | heterogeneous nuclear ribonucleoprotein A1 [ MGI:104820]             | 13.9 | 2.4   | 5.9  |
| Lrrc8c   | leucine rich repeat containing 8 family, member C                    | 13.9 | 4.4   | 3.1  |
| Tpbg     | trophoblast glycoprotein [ MGI:1341264]                              | 13.8 | 4.3   | 3.2  |
| Smim15   | small integral membrane protein 15 [ MGI:1922866]                    | 13.8 | 1.0   | 13.5 |
| Gm9938   | predicted gene 9938 [ MGI:3641836]                                   | 13.8 | 2.6   | 5.2  |

|          |                                                                      |      |      |      |
|----------|----------------------------------------------------------------------|------|------|------|
| Ube4b    | ubiquitination factor E4B, UFD2 homolog ( <i>S. cerevisiae</i> )     | 13.8 | 4.8  | 2.9  |
| Gid8     | Novel protein                                                        | 13.8 | 2.4  | 5.7  |
| Slit3    | slit homolog 3 ( <i>Drosophila</i> )                                 | 13.7 | 12.1 | 1.1  |
| Cpeb4    | cytoplasmic polyadenylation element binding protein 4                | 13.7 | 2.6  | 5.3  |
| Alg11    | asparagine-linked glycosylation 11 homolog (yeast, alpha-1,2-man)    | 13.7 | 5.2  | 2.6  |
| Lysmd3   | LysM, putative peptidoglycan-binding, domain containing 3 [ MGI      | 13.7 | 3.0  | 4.6  |
| Emp2     | epithelial membrane protein 2                                        | 13.7 | 6.1  | 2.3  |
| Edil3    | EGF-like repeats and discoidin I-like domains 3                      | 13.7 | 2.3  | 6.1  |
| Map3k7   | mitogen activated protein kinase kinase kinase 7                     | 13.7 | 3.7  | 3.7  |
| Sp2      | Sp2 transcription factor                                             | 13.7 | 12.0 | 1.1  |
| Pfkfb3   | 6-phosphofructo-2-kinase/fructose-2,6-biphosphatase 3                | 13.7 | 6.1  | 2.2  |
| Tspo     | translocator protein [ MGI:88222]                                    | 13.6 | 3.6  | 3.8  |
| Atg12    | autophagy related 12 [ MGI:1914776]                                  | 13.6 | 5.5  | 2.5  |
| Zeb2     | zinc finger E-box binding homeobox 2                                 | 13.6 | 1.6  | 8.4  |
| Jun      | Jun oncogene                                                         | 13.6 | 4.8  | 2.8  |
| Tmem150a | transmembrane protein 150                                            | 13.6 | 13.7 | 1.0  |
| Ppp3r1   | protein phosphatase 3, regulatory subunit B, alpha isoform (calcineu | 13.6 | 5.3  | 2.6  |
| Tmsb4x   | thymosin, beta 4, X chromosome                                       | 13.6 | 1.8  | 7.4  |
| Tgfb2    | transforming growth factor, beta 2 [ MGI:98726]                      | 13.6 | 2.4  | 5.6  |
| Copz2    | coatamer protein complex, subunit zeta 2                             | 13.6 | 15.6 | 0.9  |
| Eif2s1   | eukaryotic translation initiation factor 2, subunit 1 alpha          | 13.6 | 2.3  | 5.8  |
| Sfxn2    | sideroflexin 2 [ MGI:2137678]                                        | 13.5 | 0.7  | 19.5 |
| Prkaa1   | protein kinase, AMP-activated, alpha 1 catalytic subunit [ MGI:214   | 13.5 | 3.2  | 4.2  |
| Txnrd1   | thioredoxin reductase 1 [ MGI:1354175]                               | 13.5 | 6.4  | 2.1  |
| Arid1a   | AT rich interactive domain 1A ( <i>Swi1</i> like)                    | 13.5 | 22.5 | 0.6  |
| N4bp1    | NEDD4 binding protein 1 [ MGI:2136825]                               | 13.5 | 22.5 | 0.6  |
| Ubxn7    | UBX domain protein 7 [ MGI:2146388]                                  | 13.5 | 1.8  | 7.5  |
| Phf17    | PHD finger protein 17 [ MGI:1925835]                                 | 13.5 | 4.0  | 3.4  |
| Efhd2    | EF hand domain containing 2                                          | 13.5 | 6.0  | 2.2  |
| Abhd4    | abhydrolase domain containing 4 [ MGI:1915938]                       | 13.5 | 12.3 | 1.1  |
| Avpi1    | arginine vasopressin-induced 1                                       | 13.5 | 1.1  | 11.9 |
| Rfk      | riboflavin kinase                                                    | 13.5 | 3.6  | 3.8  |
| Pura     | purine rich element binding protein A                                | 13.4 | 2.4  | 5.6  |
| Rcan1    | regulator of calcineurin 1 [ MGI:1890564]                            | 13.4 | 3.3  | 4.0  |
| Cflar    | CASP8 and FADD-like apoptosis regulator                              | 13.4 | 3.5  | 3.9  |
| Peg10    | paternally expressed 10                                              | 13.4 | 2.3  | 5.9  |
| Ppfibp1  | PTPRF interacting protein, binding protein 1 (liprin beta 1)         | 13.4 | 3.1  | 4.3  |
| Tcp1     | t-complex protein 1                                                  | 13.4 | 5.4  | 2.5  |
| Dctpp1   | dCTP pyrophosphatase 1                                               | 13.4 | 0.2  | 81.1 |
| Cinp     | cyclin-dependent kinase 2 interacting protein [ MGI:1914486]         | 13.4 | 0.9  | 15.2 |
| Phactr4  | phosphatase and actin regulator 4                                    | 13.4 | 13.2 | 1.0  |
| Bpnt1    | bisphosphate 3'-nucleotidase 1                                       | 13.4 | 2.3  | 5.9  |
| Zfp617   | zinc finger protein 617                                              | 13.4 | 1.8  | 7.6  |
| Ergic3   | ERGIC and golgi 3                                                    | 13.3 | 7.6  | 1.8  |
| Enah     | enabled homolog ( <i>Drosophila</i> ) [ MGI:108360]                  | 13.3 | 3.8  | 3.6  |
| Sfrp1    | secreted frizzled-related sequence protein 1                         | 13.3 | 2.3  | 5.7  |
| Kank2    | KN motif and ankyrin repeat domains 2 [ MGI:2384568]                 | 13.3 | 8.9  | 1.5  |

|           |                                                                      |      |      |      |
|-----------|----------------------------------------------------------------------|------|------|------|
| Iqsec1    | IQ motif and Sec7 domain 1                                           | 13.3 | 11.4 | 1.2  |
| Atp6v0c   | ATPase, H <sup>+</sup> transporting, lysosomal V0 subunit C          | 13.3 | 17.8 | 0.7  |
| Rnf181    | ring finger protein 181                                              | 13.3 | 5.8  | 2.3  |
| Tmem104   | transmembrane protein 104                                            | 13.3 | 13.0 | 1.0  |
| Nfatc4    | nuclear factor of activated T cells, cytoplasmic, calcineurin depend | 13.2 | 5.5  | 2.4  |
| C1qbp     | complement component 1, q subcomponent binding protein               | 13.2 | 5.8  | 2.3  |
| Gsto1     | glutathione S-transferase omega 1                                    | 13.2 | 7.9  | 1.7  |
| Phf12     | PHD finger protein 12                                                | 13.2 | 15.3 | 0.9  |
| Crtc3     | CREB regulated transcription coactivator 3                           | 13.2 | 11.2 | 1.2  |
| Asap1     | ArfGAP with SH3 domain, ankyrin repeat and PH domain 1               | 13.2 | 5.0  | 2.6  |
| Tgfb3     | transforming growth factor, beta 3 [ MGI:98727]                      | 13.2 | 12.2 | 1.1  |
| Gnl3l     | guanine nucleotide binding protein-like 3 (nucleolar)-like           | 13.2 | 3.5  | 3.7  |
| Rps16     | ribosomal protein S16                                                | 13.2 | 3.0  | 4.4  |
| Fam13b    | family with sequence similarity 13, member B [ MGI:2447834]          | 13.2 | 4.4  | 3.0  |
| Fads3     | fatty acid desaturase 3 [ MGI:1928740]                               | 13.2 | 6.3  | 2.1  |
| Arhgap29  | Rho GTPase activating protein 29                                     | 13.2 | 2.9  | 4.6  |
| Grif1     | glucocorticoid receptor DNA binding factor 1 [ MGI:1929494]          | 13.2 | 14.1 | 0.9  |
| Sh3pxd2a  | SH3 and PX domains 2A [ MGI:1298393]                                 | 13.2 | 14.6 | 0.9  |
| Tmem222   | transmembrane protein 222                                            | 13.2 | 11.0 | 1.2  |
| 09-Sep    | septin 9                                                             | 13.1 | 11.2 | 1.2  |
| Ddt       | D-dopachrome tautomerase                                             | 13.1 | 0.7  | 18.1 |
| Prcp      | prolylcarboxypeptidase (angiotensinase C) [ MGI:1919711]             | 13.1 | 2.1  | 6.4  |
| Elf2      | E74-like factor 2                                                    | 13.1 | 4.6  | 2.9  |
| Znrd1     | zinc ribbon domain containing, 1                                     | 13.1 | 0.4  | 37.1 |
| Pigl      | phosphatidylinositol glycan class L                                  | 13.1 | 3.2  | 4.1  |
| Tcf12     | transcription factor 12 [ MGI:101877]                                | 13.1 | 3.6  | 3.7  |
| Tmem50b   | transmembrane protein 50B                                            | 13.1 | 1.7  | 7.6  |
| Nckap1    | NCK-associated protein 1                                             | 13.1 | 2.4  | 5.5  |
| RP23-43J1 | novel protein, ortholog of human C17orf63                            | 13.0 | 22.2 | 0.6  |
| Wdr26     | WD repeat domain 26                                                  | 13.0 | 4.7  | 2.8  |
| Akap12    | A kinase (PRKA) anchor protein (gravin) 12 [ MGI:1932576]            | 13.0 | 5.2  | 2.5  |
| Sel1l     | sel-1 suppressor of lin-12-like (C. elegans)                         | 13.0 | 4.6  | 2.8  |
| Mospd3    | motile sperm domain containing 3                                     | 13.0 | 47.2 | 0.3  |
| Cbl       | Casitas B-lineage lymphoma [ MGI:88279]                              | 13.0 | 8.1  | 1.6  |
| Tnks2     | tankyrase, TRF1-interacting ankyrin-related ADP-ribose polymerase    | 13.0 | 2.4  | 5.4  |
| Strn3     | striatin, calmodulin binding protein 3 [ MGI:2151064]                | 13.0 | 2.3  | 5.6  |
| Tor1aip1  | torsin A interacting protein 1                                       | 13.0 | 7.5  | 1.7  |
| Samd8     | sterile alpha motif domain containing 8                              | 13.0 | 1.8  | 7.1  |
| Yipf4     | Yip1 domain family, member 4 [ MGI:1915114]                          | 12.9 | 1.3  | 10.3 |
| RP23-249M | Novel protein (A430107O13Rik)                                        | 12.9 | 1.4  | 9.4  |
| Rnf4      | ring finger protein 4                                                | 12.9 | 7.4  | 1.7  |
| Glo1      | glyoxalase 1 [ MGI:95742]                                            | 12.9 | 3.5  | 3.7  |
| Smurf2    | SMAD specific E3 ubiquitin protein ligase 2                          | 12.9 | 4.2  | 3.1  |
| Plxdc2    | plexin domain containing 2                                           | 12.9 | 2.6  | 5.0  |
| Crebbp    | CREB binding protein [ MGI:1098280]                                  | 12.9 | 11.1 | 1.2  |
| Atxn1     | ataxin 1 [ MGI:104783]                                               | 12.8 | 5.6  | 2.3  |
| Gnai3     | guanine nucleotide binding protein, alpha inhibiting 3               | 12.8 | 2.6  | 4.9  |

|           |                                                                         |      |      |      |
|-----------|-------------------------------------------------------------------------|------|------|------|
| RP23-221C | novel protein (BC005624)                                                | 12.8 | 1.1  | 12.2 |
| Mapk9     | mitogen activated protein kinase 9                                      | 12.8 | 3.0  | 4.3  |
| C1qc      | complement component 1, q subcomponent, C chain                         | 12.8 | 1.5  | 8.6  |
| Pip4k2b   | phosphatidylinositol-5-phosphate 4-kinase, type II, beta                | 12.8 | 9.7  | 1.3  |
| Ctdsp1    | CTD (carboxy-terminal domain, RNA polymerase II, polypeptide A          | 12.8 | 20.2 | 0.6  |
| Myef2     | myelin basic protein expression factor 2, repressor                     | 12.8 | 1.0  | 13.2 |
| Smap1     | stromal membrane-associated protein 1                                   | 12.8 | 1.5  | 8.4  |
| Wdr18     | WD repeat domain 18 [ MGI:2158400]                                      | 12.8 | 4.5  | 2.9  |
| Larp1     | La ribonucleoprotein domain family, member 1                            | 12.7 | 9.2  | 1.4  |
| Chm       | choroideremia                                                           | 12.7 | 1.4  | 9.0  |
| Extl3     | exostoses (multiple)-like 3 [ MGI:1860765]                              | 12.7 | 6.0  | 2.1  |
| Haus2     | HAUS augmin-like complex, subunit 2                                     | 12.7 | 2.5  | 5.0  |
| Loxl3     | lysyl oxidase-like 3                                                    | 12.7 | 3.7  | 3.4  |
| Sema3a    | sema domain, immunoglobulin domain (Ig), short basic domain, se         | 12.7 | 2.6  | 4.9  |
| Arid5b    | AT rich interactive domain 5B (MRF1-like) [ MGI:2175912]                | 12.7 | 5.7  | 2.2  |
| Rpl21     | ribosomal protein L21                                                   | 12.7 | 2.5  | 5.1  |
| Ngfrap1   | nerve growth factor receptor (TNFRSF16) associated protein 1            | 12.6 | 1.6  | 8.2  |
| Pros1     | protein S (alpha)                                                       | 12.6 | 1.5  | 8.7  |
| Eif4g1    | eukaryotic translation initiation factor 4, gamma 1                     | 12.6 | 15.8 | 0.8  |
| Akt1      | thymoma viral proto-oncogene 1                                          | 12.6 | 11.9 | 1.1  |
| Pebp1     | phosphatidylethanolamine binding protein 1                              | 12.6 | 2.2  | 5.7  |
| 1810055G  | RIKEN cDNA 1810055G02 gene [ MGI:1919306]                               | 12.6 | 10.0 | 1.3  |
| Chd4      | chromodomain helicase DNA binding protein 4                             | 12.6 | 8.7  | 1.4  |
| Rps271    | ribosomal protein S27-like                                              | 12.6 | 0.8  | 16.4 |
| Pls3      | plastin 3 (T-isoform)                                                   | 12.6 | 3.0  | 4.2  |
| Arl2      | ADP-ribosylation factor-like 2                                          | 12.6 | 2.1  | 6.1  |
| Pofut2    | protein O-fucosyltransferase 2 [ MGI:1916863]                           | 12.5 | 9.8  | 1.3  |
| Ptar1     | protein prenyltransferase alpha subunit repeat containing 1 [ MGI:112.5 | 12.5 | 1.9  | 6.4  |
| Blcap     | Blcapbladder cancer associated protein homolog (human)                  | 12.5 | 12.5 | 1.0  |
| Pdgfrb    | platelet derived growth factor receptor, beta polypeptide               | 12.5 | 14.0 | 0.9  |
| Zdhhc5    | zinc finger DHHC domain containing 5                                    | 12.5 | 8.6  | 1.5  |
| Lrrfip1   | leucine rich repeat (in FLII) interacting protein 1 [ MGI:1342770]      | 12.4 | 3.7  | 3.4  |
| Pik3r1    | phosphatidylinositol 3-kinase, regulatory subunit, polypeptide 1 (pδ    | 12.4 | 2.1  | 6.0  |
| Layn      | layilin [ MGI:2685357]                                                  | 12.4 | 4.3  | 2.9  |
| Tln1      | talin 1                                                                 | 12.4 | 11.4 | 1.1  |
| Tm9sf3    | transmembrane 9 superfamily member 3 [ MGI:1914262]                     | 12.4 | 2.4  | 5.2  |
| Tmem234   | novel multidrug resistance efflux transporter EmrE superfamily pro      | 12.3 | 4.2  | 3.0  |
| Gltscr2   | glioma tumor suppressor candidate region gene 2 [ MGI:2154441]          | 12.3 | 3.5  | 3.5  |
| Usp9x     | ubiquitin specific peptidase 9, X chromosome                            | 12.3 | 1.5  | 8.4  |
| Efna5     | ephrin A5                                                               | 12.3 | 6.0  | 2.1  |
| B630005N  | RIKEN cDNA B630005N14 gene [ MGI:2141466]                               | 12.3 | 2.2  | 5.7  |
| Fam162a   | family with sequence similarity 162, member A [ MGI:1917436]            | 12.3 | 1.4  | 8.7  |
| Ctnna1    | catenin (cadherin associated protein), alpha 1 [ MGI:88274]             | 12.3 | 4.6  | 2.7  |
| Khdrbs1   | KH domain containing, RNA binding, signal transduction associate        | 12.3 | 2.5  | 5.0  |
| Lmbrd2    | LMBR1 domain containing 2 [ MGI:2444173]                                | 12.3 | 4.5  | 2.8  |
| Sulf1     | sulfatase 1 [ MGI:2138563]                                              | 12.2 | 5.7  | 2.1  |
| Tmf1      | TATA element modulatory factor 1                                        | 12.2 | 2.5  | 4.9  |

|           |                                                                              |      |      |      |
|-----------|------------------------------------------------------------------------------|------|------|------|
| Egfr      | epidermal growth factor receptor                                             | 12.2 | 2.5  | 5.0  |
| Klhl42    | kelch-like 42 [ MGI:2444786]                                                 | 12.2 | 4.0  | 3.1  |
| Mapre3    | microtubule-associated protein, RP/EB family, member 3                       | 12.2 | 6.8  | 1.8  |
| Ecm1      | extracellular matrix protein 1                                               | 12.2 | 9.3  | 1.3  |
| Vps25     | vacuolar protein sorting 25 (yeast)                                          | 12.2 | 20.6 | 0.6  |
| Prr13     | proline rich 13                                                              | 12.2 | 15.6 | 0.8  |
| Jazf1     | JAZF zinc finger 1                                                           | 12.2 | 1.6  | 7.5  |
| Actr1b    | ARP1 actin-related protein 1 homolog B, centractin beta (yeast)              | 12.2 | 18.3 | 0.7  |
| Ccbe1     | collagen and calcium binding EGF domains 1                                   | 12.2 | 17.1 | 0.7  |
| Pid1      | phosphotyrosine interaction domain containing 1                              | 12.2 | 1.5  | 8.1  |
| Efemp2    | epidermal growth factor-containing fibulin-like extracellular matrix         | 12.2 | 5.7  | 2.1  |
| Col6a3    | procollagen type VI alpha 3                                                  | 12.2 | 8.6  | 1.4  |
| Pam       | peptidylglycine alpha-amidating monooxygenase                                | 12.2 | 2.0  | 6.0  |
| Cnpy3     | canopy 3 homolog (zebrafish)                                                 | 12.2 | 6.5  | 1.9  |
| Acot2     | acyl-CoA thioesterase 2                                                      | 12.1 | 2.2  | 5.5  |
| Maged1    | melanoma antigen, family D, 1                                                | 12.1 | 7.4  | 1.6  |
| Pbrm1     | polybromo 1                                                                  | 12.1 | 2.5  | 4.8  |
| Iars      | isoleucine-tRNA synthetase                                                   | 12.1 | 4.4  | 2.7  |
| Atp2a2    | ATPase, Ca <sup>++</sup> transporting, cardiac muscle, slow twitch 2 [ MGI:8 | 12.1 | 3.3  | 3.7  |
| Zfp187    | zinc finger protein 187                                                      | 12.1 | 1.9  | 6.3  |
| Mprip     | myosin phosphatase Rho interacting protein                                   | 12.1 | 11.1 | 1.1  |
| Hs6st2    | heparan sulfate 6-O-sulfotransferase 2                                       | 12.1 | 2.0  | 6.0  |
| Prkacb    | protein kinase, cAMP dependent, catalytic, beta                              | 12.0 | 3.7  | 3.3  |
| Hspa9     | heat shock protein 9                                                         | 12.0 | 3.8  | 3.2  |
| Seh1l     | SEH1-like (S. cerevisiae [ MGI:1919374]                                      | 12.0 | 10.2 | 1.2  |
| Atrn      | attractin                                                                    | 12.0 | 2.7  | 4.5  |
| Dync1li2  | dynein, cytoplasmic 1 light intermediate chain 2 [ MGI:107738]               | 12.0 | 2.6  | 4.6  |
| Gnaq      | guanine nucleotide binding protein, alpha q polypeptide                      | 12.0 | 17.7 | 0.7  |
| Ormdl3    | ORM1-like 3 (S. cerevisiae)                                                  | 12.0 | 4.0  | 3.0  |
| Frrs1     | ferric-chelate reductase 1 [ MGI:108076]                                     | 11.9 | 3.4  | 3.5  |
| Tspan9    | tetraspanin 9                                                                | 11.9 | 9.0  | 1.3  |
| Hist1h2bc | histone cluster 1, H2bc                                                      | 11.9 | 3.2  | 3.7  |
| Gna13     | guanine nucleotide binding protein, alpha 13                                 | 11.9 | 3.2  | 3.7  |
| Asah1     | N-acylsphingosine amidohydrolase 1                                           | 11.9 | 3.2  | 3.7  |
| Lats1     | large tumor suppressor [ MGI:1333883]                                        | 11.9 | 4.0  | 3.0  |
| Rab23     | RAB23, member RAS oncogene family                                            | 11.9 | 2.9  | 4.0  |
| Snap23    | synaptosomal-associated protein 23                                           | 11.9 | 1.7  | 6.8  |
| Nek6      | NIMA (never in mitosis gene a)-related expressed                             | 11.9 | 4.8  | 2.5  |
| Mob3c     | MOB1, Mps One Binder kinase activator-like 2C (yeast)                        | 11.9 | 1.4  | 8.5  |
| Mfge8     | milk fat globule-EGF factor 8 protein [ MGI:102768]                          | 11.9 | 10.8 | 1.1  |
| Med13     | mediator complex subunit 13                                                  | 11.9 | 3.1  | 3.9  |
| Plagl2    | pleiomorphic adenoma gene-like 2                                             | 11.9 | 13.9 | 0.9  |
| Cd2ap     | CD2-associated protein [ MGI:1330281]                                        | 11.8 | 1.5  | 8.1  |
| Yipf6     | Yip1 domain family, member 6                                                 | 11.8 | 0.8  | 14.0 |
| Klf13     | Kruppel-like factor 13 [ MGI:1354948]                                        | 11.8 | 4.0  | 3.0  |
| Dnajc10   | DnaJ (Hsp40) homolog, subfamily C, member 10                                 | 11.8 | 1.0  | 12.2 |
| Mospd1    | motile sperm domain containing 1                                             | 11.8 | 0.8  | 15.2 |

|           |                                                                                |      |      |      |
|-----------|--------------------------------------------------------------------------------|------|------|------|
| Actr3     | ARP3 actin-related protein 3 [ MGI:1921367]                                    | 11.8 | 2.6  | 4.5  |
| Psmc7     | proteasome (prosome, macropain) 26S subunit, non-ATPase, 7 [ MGI:1921367]      | 11.8 | 2.8  | 4.3  |
| Tmem119   | transmembrane protein 119                                                      | 11.8 | 4.3  | 2.8  |
| Sdhb      | succinate dehydrogenase complex, subunit D, integral membrane protein          | 11.8 | 0.8  | 14.3 |
| Atp5f1    | ATP synthase, H <sup>+</sup> transporting, mitochondrial F0 complex, subunit 1 | 11.8 | 1.9  | 6.4  |
| Sorcs2    | sortilin-related VPS10 domain containing receptor 2                            | 11.8 | 20.0 | 0.6  |
| Nup115    | nucleoporin like 1 [ MGI:1919094]                                              | 11.8 | 1.9  | 6.3  |
| Trp53ip1  | transformation related protein 53 inducible protein 1                          | 11.8 | 7.5  | 1.6  |
| Marcks1   | MARCKS-like 1                                                                  | 11.8 | 33.1 | 0.4  |
| Lnpep     | leucyl/cystinyl aminopeptidase [ MGI:2387123]                                  | 11.8 | 3.4  | 3.5  |
| Rgs16     | regulator of G-protein signaling 16                                            | 11.8 | 6.7  | 1.8  |
| Colgalt1  | collagen beta(1-O)galactosyltransferase 1 [ MGI:1924348]                       | 11.8 | 6.4  | 1.8  |
| Mll5      | myeloid/lymphoid or mixed-lineage leukemia 5                                   | 11.8 | 8.9  | 1.3  |
| Gid4      | novel protein (4933439F18Rik) with a vacuolar import and degradation signal    | 11.7 | 6.0  | 2.0  |
| Clta      | clathrin light polypeptide (Lca)                                               | 11.7 | 4.0  | 2.9  |
| Cdk14     | cyclin-dependent kinase 14                                                     | 11.7 | 2.5  | 4.7  |
| Arl14ep   | novel protein                                                                  | 11.7 | 2.1  | 5.5  |
| Copb2     | coatamer protein complex, subunit beta 2 (beta prime) [ MGI:1354135]           | 11.7 | 3.4  | 3.4  |
| Phlda3    | pleckstrin homology-like domain, family A, member 3                            | 11.7 | 17.0 | 0.7  |
| 08-Sep    | septin 8                                                                       | 11.7 | 4.5  | 2.6  |
| Snrpg     | small nuclear ribonucleoprotein polypeptide G [ MGI:1915261]                   | 11.7 | 4.3  | 2.7  |
| Hdac7     | histone deacetylase 7                                                          | 11.7 | 16.2 | 0.7  |
| Zfp148    | zinc finger protein 148 [ MGI:1332234]                                         | 11.7 | 1.9  | 6.2  |
| Psen1     | presenilin 1 [ MGI:1202717]                                                    | 11.7 | 5.3  | 2.2  |
| Nploc4    | nuclear protein localization 4 homolog ( <i>S. cerevisiae</i> )                | 11.7 | 7.7  | 1.5  |
| D10Wsu1   | (DNA segment, Chr 10, Wayne State University 102, expressed in 102)            | 11.7 | 3.7  | 3.2  |
| 2810004N  | RIKEN cDNA 2810004N23 gene [ MGI:1913773]                                      | 11.7 | 1.2  | 9.9  |
| Igf2r     | insulin-like growth factor 2 receptor                                          | 11.7 | 8.5  | 1.4  |
| Atp1a1    | ATPase, Na <sup>+</sup> /K <sup>+</sup> transporting, alpha 1 polypeptide      | 11.7 | 5.9  | 2.0  |
| Sod3      | superoxide dismutase 3, extracellular [ MGI:103181]                            | 11.6 | 67.0 | 0.2  |
| Arrdc3    | arrestin domain containing 3                                                   | 11.6 | 0.9  | 13.4 |
| Sp1       | trans-acting transcription factor 1                                            | 11.6 | 5.8  | 2.0  |
| Serbp1    | serpine1 mRNA binding protein 1 [ MGI:1914120]                                 | 11.6 | 2.0  | 5.7  |
| Mmab      | methylmalonic aciduria (cobalamin deficiency) type B homolog (human)           | 11.6 | 4.4  | 2.7  |
| Ddr2      | discoidin domain receptor family, member 2 [ MGI:1345277]                      | 11.6 | 5.1  | 2.3  |
| Dcn       | decorin [ MGI:94872]                                                           | 11.6 | 1.6  | 7.1  |
| Zfx4      | zinc finger homeodomain 4                                                      | 11.6 | 6.1  | 1.9  |
| Fxr1      | fragile X mental retardation gene 1, autosomal homolog [ MGI:104104]           | 11.6 | 1.6  | 7.3  |
| Rgs17     | regulator of G-protein signaling 17                                            | 11.6 | 2.0  | 5.8  |
| Use1      | unconventional SNARE in the ER 1 homolog ( <i>S. cerevisiae</i> )              | 11.6 | 1.2  | 9.8  |
| Gpx3      | glutathione peroxidase 3                                                       | 11.6 | 10.3 | 1.1  |
| Sidt2     | SID1 transmembrane family, member 2                                            | 11.6 | 22.9 | 0.5  |
| Far1      | fatty acyl CoA reductase 1                                                     | 11.6 | 1.7  | 6.9  |
| RP23-286I | novel protein                                                                  | 11.6 | 1.1  | 10.2 |
| Slc25a37  | solute carrier family 25, member 37 [ MGI:1914962]                             | 11.6 | 2.8  | 4.2  |
| Trim44    | tripartite motif-containing 44                                                 | 11.5 | 5.2  | 2.2  |
| Txndc17   | thioredoxin domain containing 17                                               | 11.5 | 3.3  | 3.5  |

|           |                                                                           |      |      |      |
|-----------|---------------------------------------------------------------------------|------|------|------|
| Kpna3     | karyopherin (importin) alpha 3 [ MGI:1100863]                             | 11.5 | 1.8  | 6.3  |
| Ero11     | ERO1-like ( <i>S. cerevisiae</i> ) [ MGI:1354385]                         | 11.5 | 6.1  | 1.9  |
| Zfp703    | zinc finger protein 703 [ MGI:2662729]                                    | 11.5 | 29.8 | 0.4  |
| Arl8b     | ADP-ribosylation factor-like 8B [ MGI:1914416]                            | 11.5 | 3.2  | 3.6  |
| Slc26a2   | solute carrier family 26 (sulfate transporter), member 2                  | 11.5 | 1.2  | 9.3  |
| Rpl7      | ribosomal protein L7                                                      | 11.5 | 2.9  | 3.9  |
| Med29     | mediator complex subunit 29                                               | 11.5 | 1.3  | 8.8  |
| Rai14     | retinoic acid induced 14 [ MGI:1922896]                                   | 11.5 | 7.2  | 1.6  |
| Rab43     | RAB43, member RAS oncogene family                                         | 11.5 | 10.3 | 1.1  |
| Cd276     | CD276 antigen [ MGI:2183926]                                              | 11.5 | 52.7 | 0.2  |
| Hipk2     | homeodomain interacting protein kinase 2                                  | 11.5 | 9.2  | 1.2  |
| Lsp1      | lymphocyte specific 1                                                     | 11.5 | 4.7  | 2.4  |
| Fbrs      | fibrosin [ MGI:104648]                                                    | 11.5 | 35.5 | 0.3  |
| Ube2j1    | ubiquitin-conjugating enzyme E2 J1                                        | 11.5 | 3.9  | 2.9  |
| Sec31a    | Sec31 homolog A ( <i>S. cerevisiae</i> )                                  | 11.4 | 18.8 | 0.6  |
| Myst2     | MYST histone acetyltransferase 2                                          | 11.4 | 3.6  | 3.1  |
| Zbtb38    | Zinc finger and BTB domain-containing protein 38                          | 11.4 | 2.9  | 4.0  |
| Slc7a1    | solute carrier family 7 (cationic amino acid transporter, y+ system)      | 11.4 | 5.8  | 2.0  |
| Rnf10     | ring finger protein 10                                                    | 11.4 | 32.0 | 0.4  |
| Fam65a    | family with sequence similarity 65, member A [ MGI:1922937]               | 11.4 | 18.8 | 0.6  |
| C1qtnf6   | C1q and tumor necrosis factor related protein 6                           | 11.4 | 35.5 | 0.3  |
| Mafg      | v-maf musculoaponeurotic fibrosarcoma oncogene family, protein 4          | 11.4 | 9.4  | 1.2  |
| Sesn2     | sestrin 2                                                                 | 11.4 | 14.6 | 0.8  |
| Rgs2      | regulator of G-protein signaling 2                                        | 11.4 | 0.3  | 41.0 |
| Dhrs9     | dehydrogenase/reductase (SDR family) member 9                             | 11.4 | 1.0  | 11.2 |
| Sash1     | SAM and SH3 domain containing 1 [ MGI:1917347]                            | 11.4 | 7.8  | 1.5  |
| Eif3f     | eukaryotic translation initiation factor 3, subunit F                     | 11.4 | 4.3  | 2.6  |
| Bax       | BCL2-associated X protein [ MGI:99702]                                    | 11.4 | 9.3  | 1.2  |
| Phldb2    | pleckstrin homology-like domain, family B, member 2                       | 11.4 | 4.2  | 2.7  |
| Pabpn1    | poly(A) binding protein, nuclear 1                                        | 11.4 | 1.8  | 6.4  |
| Cdc73     | cell division cycle 73, Paf1/RNA polymerase II complex component          | 11.3 | 0.9  | 12.5 |
| Sec24a    | SEC24 related gene family, member A ( <i>S. cerevisiae</i> )              | 11.3 | 4.2  | 2.7  |
| Fermt2    | fermitin family homolog 2 ( <i>Drosophila</i> )                           | 11.3 | 3.0  | 3.8  |
| RP23-455I | novel protein similar to rat lectin, galactose binding, soluble 5 Lgal    | 11.3 | 3.3  | 3.5  |
| Col6a1    | procollagen type VI alpha 1                                               | 11.3 | 12.8 | 0.9  |
| C80913    | expressed sequence C80913                                                 | 11.3 | 2.0  | 5.7  |
| Psme2     | proteasome (prosome, macropain) 28 subunit, beta                          | 11.3 | 1.1  | 10.5 |
| Abi1      | abl-interactor 1                                                          | 11.3 | 2.7  | 4.2  |
| Trmt61a   | tRNA methyltransferase 61A [ MGI:2443487]                                 | 11.3 | 2.2  | 5.2  |
| Rab10     | RAB10, member RAS oncogene family [ MGI:105066]                           | 11.3 | 8.5  | 1.3  |
| Pan3      | PAN3 polyA specific ribonuclease subunit homolog ( <i>S. cerevisiae</i> ) | 11.3 | 1.5  | 7.6  |
| Epm2aip1  | EPM2A (laforin) interacting protein 1                                     | 11.3 | 5.2  | 2.2  |
| Csnk1g3   | casein kinase 1, gamma 3 [ MGI:1917675]                                   | 11.3 | 1.9  | 5.9  |
| B4galt6   | UDP-Gal:betaGlcNAc beta 1,4-galactosyltransferase, polypeptide 6          | 11.2 | 3.9  | 2.9  |
| Dbi       | diazepam binding inhibitor                                                | 11.2 | 2.4  | 4.6  |
| E2f1      | E2F transcription factor 1                                                | 11.2 | 4.4  | 2.6  |
| Txndc5    | thioredoxin domain containing 5                                           | 11.2 | 9.4  | 1.2  |

|           |                                                                      |      |      |      |
|-----------|----------------------------------------------------------------------|------|------|------|
| Cblb      | Casitas B-lineage lymphoma b [ MGI:2146430]                          | 11.2 | 6.0  | 1.9  |
| 0610009O  | RIKEN cDNA 0610009O20 gene [ MGI:1914089]                            | 11.2 | 1.4  | 8.0  |
| Pdlim5    | PDZ and LIM domain 5 [ MGI:1927489]                                  | 11.2 | 5.3  | 2.1  |
| Alcam     | activated leukocyte cell adhesion molecule                           | 11.2 | 1.0  | 11.3 |
| Dnajc3    | DnaJ (Hsp40) homolog, subfamily C, member 3 [ MGI:107373]            | 11.2 | 2.6  | 4.2  |
| Golga3    | golgi autoantigen, golgin subfamily a, 3                             | 11.2 | 2.0  | 5.7  |
| Socs6     | suppressor of cytokine signaling 6                                   | 11.1 | 2.5  | 4.5  |
| Terf2ip   | telomeric repeat binding factor 2, interacting protein [ MGI:192987] | 11.1 | 1.3  | 8.4  |
| RP23-130I | novel protein (2010106G01Rik)                                        | 11.1 | 1.8  | 6.4  |
| Fdps      | farnesyl diphosphate synthetase [ MGI:104888]                        | 11.1 | 1.2  | 9.2  |
| Zkscan1   | zinc finger with KRAB and SCAN domains 1                             | 11.1 | 2.1  | 5.2  |
| Sh3gl1    | SH3-domain GRB2-like 1 [ MGI:700010]                                 | 11.1 | 9.7  | 1.1  |
| Ncbp2     | nuclear cap binding protein subunit 2                                | 11.1 | 1.3  | 8.2  |
| RP23-3M1  | novel protein (1500011B03Rik)                                        | 11.1 | 1.0  | 11.5 |
| Ppp1r15b  | protein phosphatase 1 regulatory (inhibitor) subunit 15b             | 11.1 | 4.4  | 2.5  |
| Cdr2l     | cerebellar degeneration-related protein 2-like                       | 11.1 | 12.0 | 0.9  |
| Elovl1    | elongation of very long chain fatty acids (FEN1/Elo2, SUR4/Elo3,     | 11.1 | 11.4 | 1.0  |
| Rab11b    | RAB11B, member RAS oncogene family                                   | 11.1 | 16.5 | 0.7  |
| Nucb1     | nucleobindin 1                                                       | 11.1 | 31.3 | 0.4  |
| Ube2d2a   | ubiquitin-conjugating enzyme E2D 2A [ MGI:1930715]                   | 11.1 | 9.2  | 1.2  |
| Rab5c     | RAB5C, member RAS oncogene family                                    | 11.1 | 7.7  | 1.4  |
| Cul5      | cullin 5                                                             | 11.1 | 1.3  | 8.8  |
| Cdc34     | cell division cycle 34 [ MGI:102657]                                 | 11.0 | 23.4 | 0.5  |
| Sdccag3   | serologically defined colon cancer antigen 3                         | 11.0 | 5.7  | 1.9  |
| Eif2s2    | eukaryotic translation initiation factor 2 subunit 2 (beta)          | 11.0 | 1.5  | 7.3  |
| Pdk2      | pyruvate dehydrogenase kinase, isoenzyme 2                           | 11.0 | 5.0  | 2.2  |
| Cacfd1    | likely ortholog of H. sapiens chromosome 9 open reading frame 7 (    | 11.0 | 3.0  | 3.7  |
| Ddb1      | damage specific DNA binding protein 1 [ MGI:1202384]                 | 11.0 | 5.7  | 1.9  |
| Serinc3   | serine incorporator 3                                                | 11.0 | 4.5  | 2.5  |
| Rap1gds1  | RAP1, GTP-GDP dissociation stimulator 1 [ MGI:2385189]               | 11.0 | 2.1  | 5.2  |
| Flot2     | flotillin 2                                                          | 11.0 | 19.9 | 0.6  |
| Larp4b    | La ribonucleoprotein domain family, member 4B [ MGI:106330]          | 11.0 | 2.4  | 4.6  |
| Ahcy11    | S-adenosylhomocysteine hydrolase-like 1                              | 11.0 | 3.1  | 3.6  |
| Smad4     | MAD homolog 4 (Drosophila)                                           | 11.0 | 2.1  | 5.3  |
| Pi4k2a    | phosphatidylinositol 4-kinase type 2 alpha [ MGI:1934031]            | 10.9 | 6.0  | 1.8  |
| Cplx2     | complexin 2                                                          | 10.9 | 5.5  | 2.0  |
| Bcl2l1    | Bcl2-like 1                                                          | 10.9 | 8.7  | 1.3  |
| Fbxw9     | F-box and WD-40 domain protein 9                                     | 10.9 | 3.2  | 3.4  |
| RP23-360/ | novel KRAB box and zinc finger, C2H2 type domain containing pr       | 10.9 | 0.4  | 27.6 |
| Dnajb11   | DnaJ (Hsp40) homolog, subfamily B, member 11                         | 10.9 | 2.4  | 4.5  |
| Pacs1     | phosphofurin acidic cluster sorting protein 1 [ MGI:1277113]         | 10.9 | 23.8 | 0.5  |
| Ctif      | CBP80/20-dependent translation initiation factor [ MGI:2685518]      | 10.9 | 6.0  | 1.8  |
| Copa      | coatamer protein complex subunit alpha                               | 10.9 | 8.4  | 1.3  |
| Rap2c     | RAP2C, member of RAS oncogene family                                 | 10.9 | 7.5  | 1.5  |
| Csnk1g2   | casein kinase 1, gamma 2 [ MGI:1920014]                              | 10.9 | 7.9  | 1.4  |
| H2afj     | H2A histone family, member J                                         | 10.9 | 1.8  | 6.0  |
| Trio      | triple functional domain (PTPRF interacting) [ MGI:1927230]          | 10.8 | 13.0 | 0.8  |



|           |                                                                              |      |      |      |
|-----------|------------------------------------------------------------------------------|------|------|------|
| Ran       | RAN, member RAS oncogene family                                              | 10.8 | 2.0  | 5.5  |
| Srsf2     | splicing factor, arginine/serine-rich 2 (SC-35)                              | 10.8 | 1.2  | 8.8  |
| Uba1      | ubiquitin-like modifier activating enzyme 1                                  | 10.8 | 20.0 | 0.5  |
| Tmem131   | transmembrane protein 131 [ MGI:1927110]                                     | 10.8 | 3.3  | 3.3  |
| Alg10b    | asparagine-linked glycosylation 10B (alpha-1,2-glucosyltransferase           | 10.8 | 3.1  | 3.5  |
| B4galt5   | UDP-Gal:betaGlcNAc beta 1 4-galactosyltransferase polypeptide 5              | 10.8 | 6.7  | 1.6  |
| Actg2     | actin, gamma 2, smooth muscle, enteric                                       | 10.8 | 2.5  | 4.4  |
| Rpl39     | ribosomal protein L39                                                        | 10.8 | 1.0  | 10.7 |
| Rhbdd1    | rhomoid domain containing 1                                                  | 10.8 | 2.8  | 3.8  |
| 9430020K1 | RIKEN cDNA 9430020K01 gene [ MGI:2685174]                                    | 10.8 | 7.5  | 1.4  |
| Degs1     | degenerative spermatocyte homolog 1                                          | 10.8 | 2.2  | 5.0  |
| Ephx1     | epoxide hydrolase 1 microsomal                                               | 10.8 | 4.3  | 2.5  |
| Ubqln2    | ubiquilin 2                                                                  | 10.8 | 14.3 | 0.8  |
| Arl1      | ADP-ribosylation factor-like 1                                               | 10.8 | 2.4  | 4.6  |
| Aff1      | AF4/FMR2 family, member 1                                                    | 10.7 | 6.0  | 1.8  |
| Srrm1     | serine/arginine repetitive matrix 1                                          | 10.7 | 7.9  | 1.4  |
| Gxylt1    | glycosyltransferase 8 domain containing 3                                    | 10.7 | 1.5  | 7.0  |
| Eci2      | peroxisomal delta3, delta2-enoyl-Coenzyme A isomerase                        | 10.7 | 0.7  | 15.4 |
| Lmo4      | LIM domain only 4                                                            | 10.7 | 2.5  | 4.4  |
| Gm2a      | GM2 ganglioside activator protein                                            | 10.7 | 2.0  | 5.4  |
| Fam63b    | family with sequence similarity 63, member B [ MGI:2443086]                  | 10.7 | 1.8  | 5.9  |
| Napa      | N-ethylmaleimide sensitive fusion protein attachment protein alpha           | 10.7 | 11.1 | 1.0  |
| Nkain1    | Na <sup>+</sup> /K <sup>+</sup> transporting ATPase interacting 1            | 10.7 | 7.4  | 1.4  |
| Pard6g    | par-6 partitioning defective 6 homolog gamma (C. elegans) [ MGI:             | 10.7 | 1.9  | 5.6  |
| Asna1     | arsA arsenite transporter, ATP-binding, homolog 1 (bacterial) [ MC           | 10.7 | 21.0 | 0.5  |
| Atp5j     | ATP synthase, H <sup>+</sup> transporting, mitochondrial F0 complex, subunit | 10.7 | 2.8  | 3.8  |
| Fam114a1  | family with sequence similarity 114, member A1                               | 10.6 | 1.9  | 5.6  |
| Aga       | aspartylglucosaminidase [ MGI:104873]                                        | 10.6 | 2.8  | 3.8  |
| Snrpd1    | small nuclear ribonucleoprotein D1 [ MGI:98344]                              | 10.6 | 0.6  | 17.7 |
| Dkk2      | dickkopf homolog 2 (Xenopus laevis) [ MGI:1890663]                           | 10.6 | 1.3  | 8.2  |
| Stc1      | stanniocalcin 1 [ MGI:109131]                                                | 10.6 | 7.2  | 1.5  |
| Iqgap1    | IQ motif containing GTPase activating protein 1 [ MGI:1352757]               | 10.6 | 4.9  | 2.2  |
| Cast      | calpastatin [ MGI:1098236]                                                   | 10.6 | 2.8  | 3.8  |
| Vamp7     | vesicle-associated membrane protein 7 [ MGI:1096399]                         | 10.6 | 0.9  | 11.4 |
| Uqcrh     | ubiquinol-cytochrome c reductase hinge protein                               | 10.6 | 2.3  | 4.5  |
| Slc25a23  | solute carrier family 25 (mitochondrial carrier; phosphate carrier), 1       | 10.6 | 17.5 | 0.6  |
| Ucp2      | uncoupling protein 2 (mitochondrial, proton carrier)                         | 10.6 | 11.2 | 0.9  |
| St5       | suppression of tumorigenicity 5 [ MGI:108517]                                | 10.6 | 8.6  | 1.2  |
| Tmem55a   | transmembrane protein 55A                                                    | 10.6 | 2.1  | 5.0  |
| Xpo5      | exportin 5 [ MGI:1913789]                                                    | 10.6 | 1.9  | 5.6  |
| Kctd10    | potassium channel tetramerisation domain containing 10                       | 10.5 | 8.5  | 1.2  |
| Dynlrb1   | dynein light chain roadblock-type 1                                          | 10.5 | 4.0  | 2.7  |
| Atox1     | ATX1 (antioxidant protein 1) homolog 1 (yeast)                               | 10.5 | 0.5  | 20.4 |
| Tnfrsf1a  | tumor necrosis factor receptor superfamily, member 1a                        | 10.5 | 23.4 | 0.5  |
| Pcmt1     | protein-L-isoaspartate (D-aspartate) O-methyltransferase domain co           | 10.5 | 1.5  | 6.9  |
| Fasn      | fatty acid synthase                                                          | 10.5 | 11.9 | 0.9  |
| Ykt6      | YKT6 homolog (S. Cerevisiae)                                                 | 10.5 | 7.4  | 1.4  |

|           |                                                                     |      |      |      |
|-----------|---------------------------------------------------------------------|------|------|------|
| Pdzrn3    | PDZ domain containing RING finger 3                                 | 10.5 | 4.6  | 2.3  |
| Morf4l2   | mortality factor 4 like 2                                           | 10.5 | 1.4  | 7.7  |
| Dpp8      | dipeptidylpeptidase 8 [ MGI:1921638]                                | 10.5 | 2.4  | 4.4  |
| Stk24     | serine/threonine kinase 24 [ MGI:2385007]                           | 10.5 | 3.5  | 3.0  |
| Pitpna    | phosphatidylinositol transfer protein, alpha                        | 10.5 | 4.4  | 2.4  |
| Cdh2      | cadherin 2                                                          | 10.5 | 3.5  | 3.0  |
| Fam134a   | family with sequence similarity 134, member A [ MGI:2388278]        | 10.5 | 13.0 | 0.8  |
| Efr3a     | EFR3 homolog A ( <i>S. cerevisiae</i> )                             | 10.5 | 2.8  | 3.8  |
| RP23-149C | novel protein similar to phosphoserine/threonine/tyrosine interacti | 10.5 | 2.0  | 5.1  |
| Atp6ap2   | ATPase, H <sup>+</sup> transporting, lysosomal accessory protein    | 10.5 | 0.7  | 14.0 |
| Rtn3      | reticulon 3 [ MGI:1339970]                                          | 10.5 | 8.7  | 1.2  |
| Cdk12     | Cdc2-related kinase, arginine/serine-rich                           | 10.4 | 2.4  | 4.4  |
| Zeb1      | zinc finger E-box binding homeobox 1                                | 10.4 | 3.2  | 3.3  |
| Ephb3     | Eph receptor B3                                                     | 10.4 | 2.2  | 4.8  |
| Plxnb2    | plexin B2                                                           | 10.4 | 8.3  | 1.2  |
| Atp6v1a   | ATPase, H <sup>+</sup> transporting, lysosomal V1 subunit A         | 10.4 | 2.6  | 4.0  |
| Dctn5     | dynactin 5                                                          | 10.4 | 1.2  | 8.5  |
| Map2k1    | mitogen activated protein kinase kinase 1                           | 10.4 | 1.3  | 8.3  |
| Cnih      | cornichon homolog ( <i>Drosophila</i> )                             | 10.4 | 1.3  | 7.9  |
| Tor1b     | torsin family 1, member B                                           | 10.4 | 3.7  | 2.8  |
| Agpat4    | 1-acylglycerol-3-phosphate O-acyltransferase 4 (lysophosphatidic ε  | 10.4 | 1.3  | 7.8  |
| Add1      | adducin 1 (alpha)                                                   | 10.4 | 12.3 | 0.8  |
| Ebf1      | early B-cell factor 1                                               | 10.4 | 2.2  | 4.7  |
| Btf3l4    | basic transcription factor 3-like 4                                 | 10.4 | 0.2  | 58.3 |
| Stt3b     | STT3, subunit of the oligosaccharyltransferase complex, homolog l   | 10.4 | 3.9  | 2.6  |
| Gli3      | GLI-Kruppel family member GLI3                                      | 10.3 | 8.8  | 1.2  |
| Ndufa13   | NADH dehydrogenase (ubiquinone) 1 alpha subcomplex, 13 [ MGI        | 10.3 | 1.7  | 6.2  |
| Trim35    | tripartite motif-containing 35                                      | 10.3 | 5.4  | 1.9  |
| Gpi1      | glucose phosphate isomerase 1                                       | 10.3 | 6.0  | 1.7  |
| Fnip2     | folliculin interacting protein 2                                    | 10.3 | 2.6  | 3.9  |
| Usp45     | ubiquitin specific petidase 45                                      | 10.3 | 1.2  | 8.5  |
| Ppap2b    | phosphatidic acid phosphatase type 2B                               | 10.3 | 5.6  | 1.8  |
| Pgrmc1    | progesterone receptor membrane component 1                          | 10.3 | 3.1  | 3.3  |
| Srprb     | signal recognition particle receptor, B subunit                     | 10.3 | 5.6  | 1.8  |
| Ltbp2     | latent transforming growth factor beta binding protein 2            | 10.3 | 11.6 | 0.9  |
| Gpr107    | G protein-coupled receptor 107                                      | 10.3 | 6.3  | 1.6  |
| Fam136a   | family with sequence similarity 136, member A [ MGI:1913738]        | 10.3 | 1.4  | 7.2  |
| Taok3     | TAO kinase 3                                                        | 10.3 | 4.3  | 2.4  |
| Map4k4    | mitogen-activated protein kinase kinase kinase kinase 4 [ MGI:134   | 10.2 | 7.0  | 1.5  |
| Sh2b3     | SH2B adaptor protein 3                                              | 10.2 | 25.3 | 0.4  |
| Pcgf3     | polycomb group ring finger 3                                        | 10.2 | 3.3  | 3.1  |
| Vps26a    | vacuolar protein sorting 26 homolog A (yeast) [ MGI:1353654]        | 10.2 | 2.0  | 5.1  |
| Brd3      | bromodomain containing 3                                            | 10.2 | 3.3  | 3.1  |
| Atp11a    | ATPase, class VI, type 11A                                          | 10.2 | 5.2  | 2.0  |
| Marveld1  | MARVEL (membrane-associating) domain containing 1                   | 10.2 | 7.9  | 1.3  |
| Srsf1     | serine/arginine-rich splicing factor 1                              | 10.2 | 2.5  | 4.0  |
| Cnbp      | cellular nucleic acid binding protein                               | 10.2 | 1.9  | 5.2  |

|          |                                                              |      |      |      |
|----------|--------------------------------------------------------------|------|------|------|
| Plau     | plasminogen activator, urokinase [ MGI:97611]                | 10.2 | 3.6  | 2.9  |
| Mt1      | metallothionein 1 [ MGI:97171]                               | 10.2 | 1.8  | 5.8  |
| Syncrip  | synaptotagmin binding, cytoplasmic RNA interacting protein   | 10.2 | 1.3  | 8.0  |
| Sfr1     | SWI5 dependent recombination repair 1 [ MGI:1915038]         | 10.2 | 1.8  | 5.5  |
| Kbtbd2   | kelch repeat and BTB (POZ) domain containing 2               | 10.2 | 1.1  | 8.9  |
| Il1r1    | interleukin 1 receptor, type I [ MGI:96545]                  | 10.2 | 2.0  | 5.0  |
| Luc712   | LUC7-like 2 ( <i>S. cerevisiae</i> )                         | 10.2 | 1.1  | 9.6  |
| Hnrnpab  | heterogeneous nuclear ribonucleoprotein A/B                  | 10.1 | 5.5  | 1.9  |
| Mob4     | MOB1, Mps One Binder kinase activator-like 3 (yeast)         | 10.1 | 1.1  | 9.6  |
| Polk     | polymerase (DNA directed), kappa [ MGI:1349767]              | 10.1 | 0.7  | 15.0 |
| Mex3c    | mex3 homolog C ( <i>C. elegans</i> )                         | 10.1 | 3.8  | 2.7  |
| Tmx4     | thioredoxin-related transmembrane protein 4                  | 10.1 | 2.3  | 4.4  |
| Fnbp1    | formin binding protein 1                                     | 10.1 | 7.8  | 1.3  |
| Sgp11    | sphingosine phosphate lyase 1                                | 10.1 | 7.3  | 1.4  |
| Nop56    | NOP56 ribonucleoprotein homolog (yeast)                      | 10.1 | 1.6  | 6.3  |
| Ndufb10  | NADH dehydrogenase (ubiquinone) 1 beta subcomplex, 10        | 10.1 | 0.7  | 14.0 |
| H6pd     | hexose-6-phosphate dehydrogenase (glucose 1-dehydrogenase)   | 10.1 | 7.7  | 1.3  |
| Tgfbr3   | transforming growth factor, beta receptor III                | 10.1 | 2.4  | 4.2  |
| Irak1    | interleukin-1 receptor-associated kinase 1                   | 10.1 | 6.8  | 1.5  |
| Atp6v1b2 | ATPase, H <sup>+</sup> transporting, lysosomal V1 subunit B2 | 10.0 | 3.2  | 3.1  |
| Ufd11    | ubiquitin fusion degradation 1 like                          | 10.0 | 2.5  | 4.0  |
| Prdx1    | peroxiredoxin 1                                              | 10.0 | 1.5  | 6.5  |
| Cdc37    | cell division cycle 37 [ MGI:109531]                         | 10.0 | 4.6  | 2.2  |
| Rpl28    | ribosomal protein L28                                        | 10.0 | 17.6 | 0.6  |
| Scarb2   | scavenger receptor class B, member 2 [ MGI:1196458]          | 10.0 | 2.4  | 4.2  |
| Rnh1     | ribonuclease/angiogenin inhibitor 1 [ MGI:1195456]           | 10.0 | 4.2  | 2.4  |
| RP23-22A | novel protein (1500003O03Rik)                                | 10.0 | 11.9 | 0.8  |
| Sav1     | salvador homolog 1 ( <i>Drosophila</i> ) [ MGI:1927144]      | 10.0 | 3.5  | 2.9  |
| Stk35    | serine/threonine kinase 35                                   | 10.0 | 13.5 | 0.7  |
| Rap1a    | RAS-related protein-1a [ MGI:97852]                          | 10.0 | 1.0  | 10.5 |
| Trip12   | thyroid hormone receptor interactor 12 [ MGI:1309481]        | 10.0 | 4.2  | 2.4  |
| Zfp593   | zinc finger protein 593                                      | 10.0 | 1.2  | 8.5  |
| Stxbp1   | syntaxin binding protein 1                                   | 10.0 | 11.2 | 0.9  |
| Ubxn4    | UBX domain protein 4 [ MGI:1915062]                          | 10.0 | 1.7  | 5.9  |
| Eif3c    | eukaryotic translation initiation factor 3, subunit C        | 10.0 | 3.4  | 2.9  |
| Cox14    | cytochrome c oxidase assembly protein 14 [ MGI:1913629]      | 10.0 | 0.5  | 21.5 |

**Table S10.** Primers used for amplifying potential PCBP4 targets

| <b>Genes</b> | <b>Primers</b> | <b>Sequences</b>            | <b>Region</b> |
|--------------|----------------|-----------------------------|---------------|
| ZFP871       | Forward        | 5'-CAGTTTGGAGCACCATATC-3'   | nt 281-500    |
|              | Reverse        | 5'-AGAGATAAATGGCCAATGAC-3'  |               |
| CCNI         | Forward        | 5'-TGTTGGAAAGGGCAATCTC-3'   | nt 670-933    |
|              | Reverse        | 5'-TCAACAGTCTTAGCAGCCAG-3'  |               |
| BMP1a        | Forward        | 5'-TACACCAGTGAGACAGCAG-3'   | nt 341-570    |
|              | Reverse        | 5'-GTATCCTCTGGTGCTAAAG-3'   |               |
| ARF3         | Forward        | 5'-CCATTGGGTT TAATGTGGAG-3' | nt 371-599    |
|              | Reverse        | 5'-ACACAAGGAGCACAGCATC-3'   |               |
| RAB1         | Forward        | 5'-CAAGTTGTT GGTAGGGAAC-3'  | nt 382-580    |
|              | Reverse        | 5'-CACCAGCTGTAGCTCCAG-3'    |               |
| BMP4         | Forward        | 5'-GTTTGTCAA GATTGGCTCC-3'  | nt 361-510    |
|              | Reverse        | 5'-GTATCAAAC TAGCATGGCTC-3' |               |
| Rhoq         | Forward        | 5'-CATGACTGACGTCTTCCTC-3'   | nt 732-950    |
|              | Reverse        | 5'-GCTAGTTTCTGTCCTTGTTTC-3' |               |
| Polr3gl      | Forward        | 5'-GCACTGAAGCAAGAGCTG-3'    | nt 301-520    |
|              | Reverse        | 5'-GGGAAGGATAATGGTGGT-3'    |               |

**Table S11.** Primers used to amplify fragments A-F from ZFP871 3`UTR

| Probe templates   | Primers | Sequences                                                 |
|-------------------|---------|-----------------------------------------------------------|
| A (nt 1968-3480)  | Forward | 5'-GGATCCTAATACGACTCACTAAGGGAGTCATGGGAGGATTTTTTCC-3'      |
|                   | Reverse | 5'-CAATTTACCAATGAATCTAACAT-3'                             |
| B (nt 3481-5000)  | Forward | 5'-GGATCCTAATACGACTCACTATAGGGAGATATTTGAAGTATGCCAGTCC-3'   |
|                   | Reverse | 5'-AGGTAGTGAATAGCTGCTGG-3'                                |
| C (nt 5001-6520)  | Forward | 5'-GGATCCTAATACGACTCACTATAGGGAGGTAGCTTCTCAGTAAGGGAG-3'    |
|                   | Reverse | 5'-TAAGGGAGTCTACTTGGGAG-3'                                |
| D (nt 6251-8070)  | Forward | 5'-GGATCCTAATACGACTCACTATAGGGAGTTCATCTCTCTAGTTTGTTTAC-3'  |
|                   | Reverse | 5'-TTTCCAGAAATAGAGAACACAC-3'                              |
| E (nt 8071-9582)  | Forward | 5'-GGATCCTAATACGACTCACTATAGGGAGTAATGACATTGGAACCTTTGAGG-3' |
|                   | Reverse | 5'-TAAACATGGAAGAGAACAAATG-3'                              |
| F (nt 9583-10829) | Forward | 5'-GGATCCTAATACGACTCACTATAGGGAGACCTACAGTCTCCTTAATGC-3'    |
|                   | Reverse | 5'-GAGATTTACTTACAGGAGTATC-3'                              |
